# 1 A human pan-genomic analysis reconfigures the genetic 2 and epigenetic make up of facioscapulohumeral 3 muscular dystrophy

4

5 **Authors:** Valentina Salsi, <sup>1†</sup> Matteo Chiara,<sup>2,3†</sup> Sara Pini,<sup>1</sup> Paweł Kuś,<sup>4</sup> Lucia Ruggiero,<sup>5</sup>  
6 Silvia Bonanno,<sup>6</sup> Carmelo Rodolico,<sup>7</sup> Stefano C. Previtali,<sup>8</sup> Maria Grazia D'Angelo,<sup>9</sup> Lorenzo  
7 Maggi,<sup>6</sup> Diego Lopercolo,<sup>10,11</sup> Marek Kimmel,<sup>4,12</sup> Filippo M. Santorelli,<sup>13</sup> Graziano Pesole,<sup>3,14</sup>  
8 Rossella G. Tupler<sup>1,15,16\*</sup>

## 9 **Authors' Affiliations:**

10 1. Department of Biomedical, Metabolic and Neural Sciences, University of Modena and  
11 Reggio Emilia, Modena, 41125, Italy. [valentina.salsi@unimore.it](mailto:valentina.salsi@unimore.it); [pini.saraps@gmail.com](mailto:pini.saraps@gmail.com);  
12 [rossella.tupler@unimore.it](mailto:rossella.tupler@unimore.it)\*

13 2. Dipartimento di Bioscienze, Università degli Studi di Milano, Milan, 20133, Italy.  
14 [matteo.chiara@unimi.it](mailto:matteo.chiara@unimi.it).

15 3. Institute of Biomembranes, Bioenergetics and Molecular Biotechnologies, Consiglio  
16 Nazionale delle Ricerche, Bari, 70126, Italy. [matteo.chiara@unimi.it](mailto:matteo.chiara@unimi.it);  
17 [graziano.pesole@uniba.it](mailto:graziano.pesole@uniba.it).

18 4. Department of Systems Biology and Engineering, Silesian University of Technology,  
19 Gliwice, 44-100, Poland. [pawel.s.kus@protonmail.com](mailto:pawel.s.kus@protonmail.com); [kimmel@rice.edu](mailto:kimmel@rice.edu).

20 5. Department of Neurosciences, Reproductive and Odontostomatological Sciences,  
21 University Federico II of Naples, Naples, 80131, Italy. [ruggilucia@gmail.com](mailto:ruggilucia@gmail.com).

22 6. IRCCS Foundation, C. Besta Neurological Institute, Milan, 20133, Italy.  
23 [Silvia.Bonanno@istituto-besta.it](mailto:Silvia.Bonanno@istituto-besta.it); [Lorenzo.Maggi@istituto-besta.it](mailto:Lorenzo.Maggi@istituto-besta.it).

24 7. Department of Clinical and Experimental Medicine, University of Messina, Messina,  
25 98125 Italy. [carmelo.rodolico@unime.it](mailto:carmelo.rodolico@unime.it).

NOTE: This preprint reports new research that has not been certified by peer review and should not be used to guide clinical practice.

- 26 8. INSPE and Division of Neuroscience, IRCCS San Raffaele Scientific Institute, Milan,  
27 20133, Italy. [previtali.stefano@hsr.it](mailto:previtali.stefano@hsr.it).
- 28 9. Department of Neurorehabilitation, IRCCS Eugenio Medea, Bosisio Parini, 23842, Italy.  
29 [grazia.dangelo@lanostrafamiglia.it](mailto:grazia.dangelo@lanostrafamiglia.it).
- 30 10. Department of Medicine, Surgery and Neurosciences, University of Siena, Siena, 53100  
31 Italy. [diego.lopergolo@unifi.it](mailto:diego.lopergolo@unifi.it).
- 32 11. UOC Neurologia e Malattie Neurometaboliche, Azienda Ospedaliero Universitaria  
33 Senese, Policlinico Le Scotte, 53100 Siena, Italy. [diego.lopergolo@unifi.it](mailto:diego.lopergolo@unifi.it).
- 34 12. Departments of Statistics and Bioengineering, Rice University, Houston, TX, 77005,  
35 United States. [kimmel@rice.edu](mailto:kimmel@rice.edu).
- 36 13. IRCCS Fondazione Stella Maris, Pisa, 56128, Italy. [filippo3364@gmail.com](mailto:filippo3364@gmail.com).
- 37 14. Department of Biosciences, Biotechnology and Environment, University of Bari "A.  
38 Moro", Bari, 70126, Italy. [graziano.pesole@uniba.it](mailto:graziano.pesole@uniba.it).
- 39 15. Department of Molecular, Cell, and Cancer Biology, University of Massachusetts  
40 Medical School, Worcester, MA 01605, United States. [rossella.tupler@unimore.it](mailto:rossella.tupler@unimore.it) \*.
- 41 16. Li Weibo Institute for Rare Diseases Research at the University of Massachusetts  
42 Medical School, Worcester, MA 01605, United States. [rossella.tupler@unimore.it](mailto:rossella.tupler@unimore.it) \*.

43

44 † Valentina Salsi and Matteo Chiara contributed equally to this study and reserve the right to list themselves  
45 as first author.

46

47 **\*Corresponding Author:**

48 Rossella Tupler, M.D., Ph.D., Department of Biomedical, Metabolic and Neural Sciences, University of  
49 Modena and Reggio Emilia, Email: [rossella.tupler@unimore.it](mailto:rossella.tupler@unimore.it)).

50

51 **ABSTRACT**

52 Facioscapulohumeral muscular dystrophy (FSHD) is the only human disease associated  
53 with epigenetic changes at a macrosatellite array. Almost 95% of FSHD cases carry a  
54 reduced number ( $\leq 10$ ) of tandem 3.3 kilobase repeats, termed D4Z4, on chromosome 4q35;  
55 remaining cases bear variants in chromatin remodeling factors, such as SMCHD1,  
56 DNMT3B, LRIF1. Reduced CpG methylation is used for the molecular diagnosis of FSHD,  
57 but D4Z4-like sequences dispersed in the genome can generate ambiguous results. By  
58 analyzing complete haplotype level assemblies from the T2T-CHM13 human genome and  
59 86 haploid genomes from the human pangenome project, we uncovered the extensive  
60 number of D4Z4-like elements and their widespread inter- and intra-individual variability. An  
61 original analytical approach was developed to elucidate this previously unaccounted wealth  
62 of D4Z4-like elements and to analyze CpG methylation at D4Z4 in bisulfite-treated DNA  
63 from 29 FSHD index cases and 15 relatives. Integrated analysis of clinical phenotype, D4Z4  
64 CpG methylation level and gene variants showed that low D4Z4 methylation was associated  
65 with variants in the *SMCHD1* gene, but not with the patients' clinical phenotypes. This is the  
66 first study showing the relevance of the pangenome and T2T-CHM13 assemblies for  
67 investigating the genotype-phenotype correlation in genetic diseases. The extension and  
68 the variability of D4Z4-like elements scattered throughout the human genome and the  
69 inconsistent association of phenotypes with methylation profiles advocate for a critical  
70 revision of FSHD diagnostic tests based on D4Z4 CpG methylation assays and indicate that  
71 molecular investigations must be complemented by family studies for the proper  
72 interpretation of results.

73

## 74 Introduction

75

76 Facioscapulohumeral muscular dystrophy (FSHD) is the third most common form of  
77 hereditary myopathy with an estimated prevalence from 1/8,000 to 1/20,000<sup>1,2</sup>. FSHD is the  
78 only hereditary human disease associated with reductions in copy number of a 3.3 kb  
79 macrosatellite<sup>3</sup>, termed D4Z4. In the general population, the size of the D4Z4 repeat varies  
80 between 11 and 150 units, whereas FSHD patients carry fewer than 11 repeats<sup>4</sup>. Each copy  
81 of the 3.3 kb D4Z4 repeat contains an open reading frame (ORF) with two homeobox  
82 domains, named *DUX4*-Like (*DUXL*)<sup>5</sup>, and two different classes of GC-rich repetitive  
83 DNA<sup>6,7</sup>: hhspm3, a member of a low copy human repeat family<sup>8</sup>, and LSau, a middle  
84 repetitive DNA family<sup>8,9</sup>. A tandemly arrayed D4Z4 repeat with 98% identity to the 4q35  
85 array is located at 10q26<sup>10</sup>, but only alleles with reduced D4Z4 copy number on  
86 chromosome 4q35 have been associated with FSHD (Figure 1).

87 Two genetically distinct FSHD subtypes, FSHD1 and FSHD2, are currently  
88 described. In FSHD1 [OMIM #158900], the reduction of 4q35-D4Z4 repeats below a critical  
89 threshold (10 or fewer repeat units, RU)<sup>11</sup> is thought to determine epigenetic alterations and  
90 the inappropriate expression of nearby genes leading to disease<sup>12-14</sup>. In FSHD2 [OMIM  
91 #158901] affected individuals carry two D4Z4 arrays in the healthy range (>10 RU), but bear  
92 damaging heterozygous variants in chromatin remodeling factor genes, such as *SMCHD1*  
93 (for structural maintenance of chromosomes flexible hinge domain containing 1)<sup>15</sup>, *DNMT3B*  
94 (for methyltransferase 3B)<sup>16</sup> and *LRIF1* (for ligand-dependent nuclear receptor interacting  
95 factor 1)<sup>17</sup>. It has thus been proposed that similar to the reduction of D4Z4 RU, the  
96 inactivation of these genes alters the epigenetic configuration of the D4Z4 array at 4q35  
97 (Figure 1). Recent studies linked the molecular etiology of FSHD with the inappropriate  
98 expression of the DUX4 protein from the terminal D4Z4 repeat. Only a specific haplotype  
99 labelled 4qA-PAS is considered to be permissive for DUX4 protein expression, due to the

100 presence of a 260-bp sequence, termed pLAM, which provides a 3'-terminal exon (Exon 3)  
101 and a polyadenylation signal (PAS) (AUUAAA) in juxtaposition to the terminal copy of *DUX4*  
102 ORF (hereafter *ter-DUX4*) on 4q<sup>18,19</sup> (Figure S1). Although a similar arrangement is  
103 observed also on chr 10q26, at this locus the PAS signal is disrupted by a single nucleotide  
104 variant (AUCAAA), preventing the polyadenylation of the *ter-DUX4* mRNA. By analogy, 4qB,  
105 an alternative (to 4qA-PAS) haplotype at 4q (Figure S1), is considered not permissive for  
106 the expression of the *DUX4* protein due to the lack of pLam. Based on these observations  
107 (D4Z4 reduced copy number or heterozygous variants in chromatin remodelers, associated  
108 with 4qA-PAS haplotype) a reduction of CpG methylation of D4Z4 has been proposed as a  
109 faithful indicator of anomalous *DUX4* gene expression and it is used as a proxy of disease  
110 status in the clinical setting<sup>20</sup>.

111 This model is in contrast with clinical and epidemiological data showing reduced  
112 penetrance and clinical variability in FSHD families<sup>21-27</sup>, as well as with observations  
113 obtained by adopting an articulate neurological assessment for the study of genotype-  
114 phenotype correlation in FSHD. This latter approach includes the phenotypic classification  
115 of probands and relatives by applying the Comprehensive Clinical Evaluation Form  
116 (CCEF)<sup>28</sup>, which beside quantifying the degree of motor disability<sup>29</sup>, classifies individuals on  
117 the basis of detailed phenotypic features which include parameters such as age at onset or  
118 site of disease onset beside the detailed description of muscle impairment. Four main  
119 descriptive categories have been created. They identify: (1) subjects presenting facial and  
120 scapular girdle muscle weakness typical of FSHD (category A, subcategories A1-A3), (2)  
121 subjects presenting an incomplete phenotype with muscle weakness limited to scapular  
122 girdle or facial muscles (category B, subcategories B1 and B2), (3) asymptomatic or healthy  
123 subjects (category C, subcategories C1 and C2), and (4) subjects with myopathic  
124 phenotypes presenting clinical features not consistent with FSHD canonical phenotype  
125 (category D, subcategories D1 and D2)<sup>28</sup>. The application of this methodology for the

126 stratification of clinical phenotypes has permitted the quantification of the large phenotypic  
127 variability observed in individuals carrying a D4Z4 Reduced Allele (DRA) which is in contrast  
128 to the indication that a positive molecular test is the only determining aspect for FSHD  
129 diagnosis<sup>30–37</sup>. Studies also showed that the different categories are associated with  
130 different disease trajectories; in particular subjects assessed with a classical FSHD  
131 phenotype (Category A) display a steeper functional decline, than subjects with limited  
132 muscle impairment (Category B)<sup>31,35</sup>. Large genotype-phenotype studies also highlighted  
133 differences between probands and relatives, including 30-50% of relatives remaining non-  
134 penetrant carriers. Consistent with these findings it has been assessed that DRA with 4-8  
135 RU have the frequency of a common polymorphism (3% in the general population<sup>25,38–40</sup>),  
136 which is not compatible with the incidence of FSHD; moreover the DRA 4qA-PAS haplotype  
137 has a 2% frequency in the human population<sup>39</sup>. Finally, studies reported a wide variability in  
138 D4Z4 CpG methylation levels among FSHD index cases and FSHD families with no clear  
139 association between D4Z4 methylation status and disease manifestations or severity<sup>32,41</sup>.

140       Here, we report the results of comparative analyses of 86 haplotype-level assemblies  
141 from the Human Pangenome Project dataset (hereafter PGR)<sup>42</sup> and the outcome of high-  
142 throughput CpG methylation assay of the D4Z4 repeat based on the T2T-CHM13 human  
143 genome assembly (hereafter T2T). Our study displays all the potential of complete, high-  
144 quality haplotype level genome assemblies for the analysis of D4Z4 arrays in human  
145 diseases, confirms the high frequency of the permissive 4qA-PAS haplotype, which is  
146 comparable to a common polymorphism and shows that across the 3.3 kb D4Z4 elements  
147 only two sequences are 4q/10q-specific and amenable for the study of methylation patterns  
148 in FSHD. This refined CpG methylation assay reveals that 4q/10q-specific reduced  
149 methylation correlates with the presence of damaging *SMCHD1* heterozygous variants, but  
150 not with the clinical status of FSHD2 cases and advocate revisions of previous findings  
151 based on the GRCh38 reference (hereafter hg38).

152

## 153 **Subjects and methods**

154

### 155 **Participants**

156 The study cohort included 26 subjects (8F, 18M) reported to the Miogen Laboratory of the  
157 University of Modena and Reggio Emilia for the diagnosis of FSHD<sup>43</sup>. These cases carried  
158 D4Z4 alleles with 10 or more repeats. In 8 cases the study was extended to one or both  
159 parents, for a total of 14 subjects (7F, 7M). Overall, 5 trios and 3 parent-child couples were  
160 analyzed. Four subjects carrying a 4U DRA were also included (2F, 2M). In three of these  
161 subjects (Family C individuals III-1 and III-3; Family 1252 subject 297/08<sup>32</sup>) D4Z4  
162 methylation was previously assessed through the BSS assay using primer sets specific for  
163 the distal 4qA and 4qA-Long (4qA-L) D4Z4 repeat regions<sup>32</sup>.

164 The clinical phenotype was determined (Table S1) according to the Comprehensive  
165 Clinical Evaluation Form (CCEF), which evaluates the distribution and degree of motor  
166 impairment, age at onset of motor impairment and site of muscle weakness at onset, the  
167 presence of typical and atypical symptoms<sup>24</sup>. The CCEF has been developed by the Italian  
168 Clinical Network for FSHD to classify subjects on the basis of these clinical features. The  
169 CCEF classifies: 1) subjects presenting facial and scapular girdle muscle weakness typical  
170 of FSHD (category A, subcategories A1-A3), 2) subjects with muscle weakness limited to  
171 scapular girdle or facial muscles (category B subcategories B1, B2), 3)  
172 asymptomatic/healthy subjects (category C, subcategories C1, C2), 4) subjects with  
173 myopathic phenotype presenting clinical features not consistent with FSHD canonical  
174 phenotype (category D, subcategories D1, D2). Degree of motor impairment was also  
175 established by applying a standardized evaluation that generates the FSHD score <sup>29</sup>.

176 Signed informed consent was obtained from all the subjects prior to the inclusion in  
177 the study.



178

## 179 **Bisulfite sequencing**

180 Bisulfite sequence analysis was performed on high molecular weight genomic DNA  
181 obtained from peripheral frozen blood through phenol-chloroform extraction. To assess the  
182 methylation level at D4Z4 locus, specific primer sets were designed on hg38 genome  
183 assembly using MethPrimer tool<sup>44</sup>. No CpG sites were allowed in the primer sequence. The  
184 amplicon selection was based on following criteria: i) the sequences contain SNPs allowing  
185 to discriminate between the 4q and 10q D4Z4 repeats; and ii) include the maximum number  
186 of CpG sites possible. Amplicons were representative of the whole D4Z4 array and included  
187 functional domains such as the D4Z4 binding element (DBE)<sup>12</sup>. Table S2 and Table S3,  
188 Figure S2 summarize the characteristics of the four selected primer sets. Specific Illumina  
189 adapters were added to each set of primers.

190 Bisulfite conversion was performed on 1 µg of genomic DNA by using the EpiTec  
191 Bisulfite Kit (Cat N°59104 QIAGEN) following the manufacturer's protocol.

192 PCR amplification of both converted and non-converted DNA was performed using  
193 the four selected primer pairs (Table S2). For every subject we generated two pools of  
194 amplicons: one from bisulfite converted (BSC), one from non-converted DNA. Illumina  
195 paired-end sequencing was then performed by Eurofins genomics on the amplicon pools  
196 for a total of 36 Mb (60K read pairs per amplicon with 2 x 300 bp read mode).

197

## 198 **Bioinformatics analyses**

### 199 ***Identification and characterization of D4Z4-like sequences and D4Z4 associated*** 200 ***elements in human genome assemblies***

201 The complete sequence of a reference D4Z4 element was obtained from the hg38 assembly  
202 in UCSC genome browser (<https://genome.ucsc.edu/>). Sequence similarity searches based  
203 on the BLAST program<sup>45</sup> were performed to annotate D4Z4-like elements and functional



204 elements of the D4Z4 array (see below), in the hg38 reference assembly of the human  
205 genome [[GRCh38.p14 - hg38 - Genome - Assembly - NCBI](#) ], the T2T assembly [[T2T-  
206 CHM13v1.1 - Genome - Assembly - NCBI](#)], and 86 distinct haplotype-level assemblies from  
207 the PGR, as available from [https://github.com/human-  
208 pangenomics/HPP\\_Year1\\_Assemblies](https://github.com/human-pangenomics/HPP_Year1_Assemblies).

209 Results of BLAST sequences similarity searches were stored in simple tabular format  
210 and processed by custom Perl scripts. A similarity threshold of 85% and an alignment length  
211 threshold of 300 aligned or more aligned residues were used to define D4Z4-like elements.  
212 Matches were binned in 5 bins according to their size (<500bp; <1000bp; <1500bp;  
213 <2500bp; and <3300bp). Matches of size in-between 3200 and 3300 bp were considered  
214 to provide a complete representation of a D4Z4 macrosatellite (full match).

215 D4Z4 arrays were annotated based on the terminal repeat for the presence of qA or  
216 qB sequence variants; presence/absence of the pLam sequence and integrity of the  
217 AUUAAA polyadenylation signal (PAS). qA/B has been annotated based on the sequence  
218 of the respective probes used for the FSHD diagnostic protocol; pLam has been annotated  
219 based on the sequence reported in UCSC genome browser (<https://genome.ucsc.edu/>)  
220 (Supplemental Material and Methods).

221

### 222 ***Similarity-based clustering of D4Z4 like elements and terminal DUX4 coding*** 223 ***sequences***

224 D4Z4-like sequences of 3200 or more bp in size (full matches) were extracted from their  
225 respective genome assemblies and aligned with Kalign<sup>46</sup>. Conserved alignment blocks were  
226 extracted with Gblocks<sup>47</sup>, using the following parameter: Minimum Length Of A Block: 3,  
227 Allowed Gap Positions: none. A sequence similarity matrix was computed by means of the  
228 EMBOSS distmat program<sup>48</sup>, using the Tajima-Nei correction for multiple substitutions<sup>49</sup>.  
229 Phenetic clustering was performed by using the NJ algorithm, as implemented by hclust()

230 function from the cluster package in R<sup>50</sup>. Six distinct groups with high sequence identity  
231 were defined for the D4Z4 complete elements. D4Z4 from T2T were used to anchor/assign  
232 each group to a chromosome.

233 The same method was applied to cluster *ter-DUX4* coding sequences by sequence  
234 similarity. Terminal repeats were identified based on the presence of a qA or qB element *in*  
235 *cis* and within 15 Kb from a complete *DUX4* ORF and tentatively assigned to chr 4 or 10  
236 based on sequence similarity.

237

### 238 ***In-silico identification of target regions of primer sets in hg38 and T2T genome*** 239 ***assemblies***

240 Potential target regions of primer sets in the hg38 and T2T genome assemblies were  
241 determined by a custom Perl script (Table S4). Sequence similarity searches of primer  
242 sequences on the hg38 and T2T reference assemblies were performed by blastn, with  
243 default parameters<sup>45</sup>. All matches of 17 bp or longer and with at most 1 mismatch and all  
244 perfect matches of 16 bp or longer were recorded. Genomic coordinates were cross-  
245 referenced, and potential target genomic regions were identified as those spanned by a 5'  
246 and 3' primer pairs, in the correct orientation, and within a distance >50 bp and <600 bp.  
247 The same procedure was applied for the identification of potential primer target regions in  
248 the BSC space, in this case both the genome and the primer sequences were converted *in-*  
249 *silico*.

250

### 251 **Statistical analyses**

252 Distribution of values were compared by applying the non-parametric, two tailed  
253 Kolmogorov Smirnov test, as implemented by the `ks.test()` function from the stats package  
254 of the R programming language.

255

256 **Analysis of bisulfite converted reads**

257 ***Quality control and determination of target regions***

258 Reads' quality was assessed by Fastqc<sup>51,52</sup>. Individual reports were merged by MultiQC<sup>53</sup>  
259 and quality metrics were visually inspected.

260 Non-converted amplicons' reads were aligned to T2T and hg38 human genome  
261 assemblies using Bowtie2<sup>54</sup>. Sample-level coverage profiles were computed by bedtools  
262 genomecov<sup>55</sup>. Genomic regions covered by 100 or more reads in at least 50% of samples  
263 were considered for subsequent analyses. By this approach a total of 172 and 57 candidate  
264 target regions were identified in the T2T and hg38 assemblies, respectively. 50/57 and  
265 169/172 had at least a high similarity match (17 bp with at most 1 mismatch) to one or more  
266 primer sequences.

267 Highly similar candidate regions were collapsed to provide a non-redundant  
268 representation of repetitive sequences and allow non-ambiguous mapping of BSC reads.  
269 Different sequence identity thresholds were tested through a titration analysis to identify the  
270 ideal sequence similarity threshold. The total number of non-ambiguously mapped BSC  
271 reads and the total number of CpGs covered by at least 10 BSC reads in at least 50% of  
272 samples (testable CpGs) were recorded (Table 1). Considerations based on the number  
273 and cumulative size of genomic regions that were merged, and on the number of testable  
274 CpGs, prompted us to select 95% identity as the most appropriate threshold. In conclusion,  
275 by comparing hg38 and T2T-based analyses of non-converted reads, we defined a total of  
276 60 and 9 distinct consensus groups (groups of sequences GS) respectively (Table S5 and  
277 Table S6). For every target region the consensus sequence was determined by majority  
278 rule consensus, by applying the cons EMBOSS program<sup>48</sup>. These consensus sequences  
279 were used for the further analysis of methyl-seq data.

280

281 ***Assessment of methylation levels***

282 BSC reads were aligned to consensus target region sequences and methylation levels were  
283 determined by Bismark<sup>56</sup> +Bowtie2. The bismark\_methylation\_extractor tool was applied to  
284 compute CpG methylation levels. Only CpGs covered by more than 10 reads in at least 25  
285 patients were considered for the delineation of methylation profiles.

286

### 287 ***SMCHD1* variants analysis**

288 FSHD2 probands are routinely tested for the presence of *SMCHD1*, *DNMT3B*, *LRIF1*  
289 variants. We collected the identified *SMCHD1* variants in the cohort and performed a  
290 reannotation on GRCh37 genome assembly using wAnnovar<sup>57</sup>  
291 (<https://wannovar.wglab.org/>; the analysis was performed on the 27.9.22) and filtered. We  
292 excluded intron variants and considered only exonic (missense, stop or frameshift variants)  
293 and splicing variants with a GnomAD exome all MAF < 10<sup>-4</sup> (GnomAD frequency for PM2  
294 pathogenic moderate rule in Varsome)<sup>58</sup>. Among the filtered variants we then excluded the  
295 ones which were benign and likely benign according to Varsome ACMG (American College  
296 of Medical Genetics and Genomics) prediction<sup>59,60</sup> (<https://varsome.com/>; the analysis was  
297 performed on 27.9.22). As *SMCHD1* gene function has not been thoroughly investigated  
298 yet, we decided not to filter out the variants predicted as VUS (Variants of Uncertain  
299 Significance). Finally, variant validation through Sanger sequencing was performed on  
300 probands and on relatives (Table S7).

301

## 302 **Results**

303

### 304 **T2T and PGR reveal the extended variability of D4Z4 repeats throughout the human 305 genome**

306 The extent of D4Z4-like repeat elements in the human genome was investigated by  
307 analyzing T2T and 86 haplotype-level genome assemblies from the PGR<sup>42</sup>.

308 Our analyses uncovered hundreds of “complete” (>3200 bp) as well as partial (300  
309 – 3200 bp) D4Z4-like sequences (hereafter D4Z4-I), irrespective of the reported geographic  
310 origin of the subjects (Table S8). The cumulative size of D4Z4-I spanned in-between 700  
311 Kb to 1.5 Mb of sequence in the haplotype-level assemblies of the 43 subjects from the  
312 PGR and accounted for approximately 1.2 Mb of sequence in T2T. D4Z4-I were scattered  
313 through several chromosomes in T2T and accounted for hundreds of kilobases of  
314 sequences on chr 1, chr 4, chr 10, chr 15, chr 21 and chr 22 (Figure 2A). Notably, in hg38  
315 only 86.5 Kb of D4Z4-I were observed, representing a more than 10-fold reduction  
316 compared with T2T and PGR (Figure 2B). In hg38, D4Z4-I were prevalently associated with  
317 the long arms of chr 4 and chr 10 (Figure 2A) where they are arranged as two large arrays  
318 of 8 and 10 complete D4Z4 repeats, respectively. PGR and T2T instead harbored a large  
319 number (minimum 285, maximum 626, Table S8) of “incomplete” D4Z4-I repeats of < 2.5  
320 Kb in size, which are lacking in hg38. Conversely (Figure 2B), the number of complete D4Z4  
321 elements included in hg38 was within the range of variability observed in T2T and PGR (26  
322 to 121). Interestingly, subjects from AFR (African) ancestry were associated with a higher  
323 variability in D4Z4-I copy numbers (Kolmogorov Smirnov test p-value p-value = 0.0006403),  
324 while a narrower range was observed in individuals of EAS (Eastern Asia) and AMR (South  
325 America) ancestry (Figure S3).

326 Figure 2C shows the variability and the distribution of complete D4Z4-I elements. Six  
327 different groups were defined on the basis of sequence identity levels. D4Z4 from T2T were  
328 used to anchor/assign each group to a chromosome. The largest clusters (Table 2) and the  
329 majority of the sequences (87%) were assigned to either chr 4 (cluster-2) or chr 10 (cluster-  
330 1); this notwithstanding, complete D4Z4 elements were also observed on chr 14 (cluster-3),  
331 chr 22 (cluster-5 and cluster-6), chr 15 and chr 21 (cluster-4). The number of complete D4Z4  
332 elements assigned to distinct clusters in the 86 PGR haplotypes is summarized in Figure  
333 2D and Table 2. Chr 4 and chr 10 were associated with a median number of 22 and 19

334 repeats, respectively. The difference was statistically significant according to a Kolmogorov  
335 Smirnov test (p-value: 0.02518). Complete D4Z4 repeats on chr 10 displayed lower  
336 variability compared with those on chr 4. Substitution rates estimates at haplotype levels  
337 suggested a high inter-individual variability, with rates ranging from 0.164 to 0.4312  
338 (average of 0.245) substitutions for 100 bp for chr 4 and from 0.015 to 0.21 (average of  
339 0.13) for chr 10 (Figure S4 and Figure S5). Interestingly, as shown in Table 2, more than  
340 75% of the assemblies carried D4Z4-I assigned to cluster-6 (chr 22); whereas less than 50%  
341 of the haplotype assemblies in the PGR had one sequence assigned to cluster-3 (chr 14),  
342 cluster-4 (chr 15-21) and cluster-5 (chr 22).

343

#### 344 **The pangenome assemblies show the high frequency of the 4qA-PAS haplotype** 345 **associated with FSHD in the world population**

346 The permissive DRA 4qA-PAS haplotype has been proposed to cause FSHD. However, we  
347 previously reported a frequency of 2% for this haplotype<sup>38</sup>, which is not compatible with the  
348 prevalence of the disease<sup>61</sup>. We thus analyzed the T2T and PGR to investigate the  
349 prevalence of this molecular signature in other populations and to study the conservation  
350 and the integrity of *ter-DUX4*.

351 The pLam and telomeric qA and qB sequences (Supplemental Material and  
352 Methods) were used to identify and classify terminal D4Z4 repeat in PGR, T2T and hg38. A  
353 total of 172 D4Z4 terminal repeats were identified (Table S9) and tentatively assigned to chr  
354 4 or chr 10 based on sequence similarity profiles (as described by the clustering of the  
355 D4Z4-I sequences in Figure 2C). Haplotypes with inconsistent annotations (2 or more qA/qB  
356 probes assigned to the same chromosome and none to the other chromosome) were not  
357 included in subsequent analysis<sup>62,63</sup>. By this approach the complete set of alleles at D4Z4  
358 repeat loci at chr 4 and chr 10 was determined for 72 haplotypes from PGR (Table S9).  
359 Patterns of conservation of *ter-DUX4* sequences were investigated. Figure 3A shows that

360 *ter-DUX4* assigned to the 10q D4Z4 terminal repeat are found to be highly similar and  
361 formed a single cluster; while 4q *ter-DUX4* are more heterogeneous and were partitioned in  
362 3 groups (Figure 3A-B). Interestingly, as shown in Figure 3C, in chr 10 and chr4\_group 2  
363 *ter-DUX4* displayed lower levels of variability (average 0.061 subs per 100 bp) compared to  
364 both chr4\_group 3 (average 0.12 subs per 100 bp) and chr4\_group 1 (average 0.142 subs  
365 per 100 bp); Figure 3A also shows that the most variable sequences (chr4\_group 1 and  
366 chr4\_group 3) were preferentially associated with qB alleles. All *ter-DUX4* sequences were  
367 found to be intact, and none was associated with frameshifts or premature stop codons.  
368 Consistent with previous observations<sup>18,19</sup>, all the alleles classified as qB did not carry a  
369 pLam and were more proximal to the *ter-DUX4* compared to qA (Figure 3D-G). In the same  
370 way, (Figure 3E-F) the vast majority of alleles classified as qA (112/119) were associated  
371 with a pLam both on chr 4 (41/47) and chr 10 (71/72). Only terminal 4q pLam had valid  
372 PAS<sup>64</sup>; while in pLam assigned to 10q the PAS sequences were disrupted by a single  
373 nucleotide substitution (AUUAAA→AUCAAA). Perfect conservation of PAS/PAS-like  
374 elements was observed both on 4q and 10q terminal D4Z4 repeats. One qB haplotype was  
375 assigned to 10q (Table 3).

376 Remarkably, in line with our previous observations<sup>38-40</sup> (Table 3), 4/86 haplotypes  
377 (4.6%) carried D4Z4 alleles with 6-8 RU and 4qA-PAS (Figure 3F). None of these  
378 haplotypes carried disruptive variants in the *ter-DUX4* or in the pLam sequence element.

379 No statistically significant difference in the total number of chr 4 D4Z4 repeats was  
380 observed when qA/qB alleles pLam+/pLam- alleles were compared (Figure 3H-I),  
381 suggesting that alleles that are not permissive for the expression of the *ter-DUX4* are not  
382 associated with significant differences in D4Z4 copy numbers compared with the permissive  
383 qA-PAS haplotype.

384



385 **D4Z4 hypomethylation correlates with *SMCHD1* damaging variants but not with FSHD**  
386 **clinical phenotype**

387 Results shown above uncover all the heterogeneity of D4Z4 repeats in the human genome,  
388 including the presence of qA D4Z4 alleles with 8 repeats or fewer, and raise potential  
389 concerns about the reliability of methylation/diagnostic tests based on the hg38. As bisulfite  
390 treated DNA sequencing at targeted regions is commonly used to diagnose FSHD<sup>65</sup>, the  
391 uncovered variability of D4Z4-I sequences prompted us to investigate D4Z4 CpG  
392 methylation comparing the hg38 and the T2T.

393 A set of primers spanning the entire length of the D4Z4 repeat and a total of 126  
394 CpGs (Figure S2 and Table S3) were designed based on hg38 assembly to recapitulate  
395 previous findings in the field<sup>41</sup>. This experimental design was used to assess a carefully  
396 selected cohort of 26 index cases referred for FSHD2 diagnosis, and 14 relatives all carrying  
397 10 or more RU. All the participants assayed were searched for damaging variants in the  
398 chromatin remodelers *SMCHD1*, *DNMT3B* and *LRIF1*. In addition, 3 FSHD1 index cases  
399 and 1 relative carrying 4 RU were studied.

400 Amplicon targeted regions were sequenced both in non-converted and in BSC DNA  
401 samples. This approach was undertaken: i. to test the 4q/10q-specificity of the primer sets  
402 commonly used and designed based on hg38 assembly<sup>41</sup>, ii. to facilitate the alignment of  
403 short BSC derived reads. Both non-converted and BSC NGS data were used for sequence  
404 alignment based on hg38 and T2T reference genomes (Table S4).

405 A total of 77% and 99.43% non-converted short reads mapped to hg38 and T2T  
406 respectively. Moreover, the majority of BSC reads (62% for T2T and 54% for hg38) did not  
407 align at 4q primer target regions, potentially suggesting “off target” sequences, and/or high  
408 levels of heterogeneity in methylation levels. To identify genomic regions targeted by our  
409 assay in an unbiased manner, genomic intervals covered by 100 or more non-converted  
410 reads in at least 50% of the samples were recorded. A total of 57 and 172 genomic regions

411 in hg38 and T2T displayed these remarkable levels of coverage. Notably, 50/57 and  
412 169/172 of the target regions delineated by coverage analyses had at least a high similarity  
413 match (17 bp with at most 1 mismatch) to one or more primer sequences. Based on these  
414 observations sequences above 95% sequence similarity were collapsed to prevent  
415 inconsistent mapping of BSC short reads across highly similar D4Z4-I elements. By this  
416 approach, we defined a total of 60 and 9 distinct consensus groups (groups of sequences,  
417 hereafter GS) in T2T and hg38 respectively (Table S5 and Table S6). Consensus  
418 sequences were computed for each GS and used for the further analysis of methyl-seq  
419 data.

420 This *ad-hoc* bioinformatics workflow revealed remarkable differences in the  
421 completeness, number, and breadth of testable CpGs when the GSs derived from hg38 and  
422 T2T were compared: hg38 125 CpG; T2T 938 CpG. Global methylation patterns were  
423 summarized in the form of a heatmap (Figure S6 and Figure S7). In the T2T-based analysis  
424 a total of 4 distinct GS including 81 distinct CpGs had no missing data and complete  
425 methylation profiles across all samples, as shown in Figure 4 and Table 4: GS1 (primer D6):  
426 28 CpGs; GS2 (primer D1): 32 CpGs; GS5 (chr 13-chr 15): 16 CpGs and GS6 (chr 13-chr  
427 15): 5 CpGs). Notably, only GS1 and GS2 included D4Z4 5' 4q/10q-specific regions  
428 exclusively, for a total of 60 CpGs, while GS5 and GS6 mapped in D4Z4-I repeats on chr  
429 13 and 15. The wide-range distributions of CpG methylation levels, as displayed in Figure  
430 S8, highlight a high variability at regions GS1 and GS2, while off-target regions GS5 and  
431 GS6 have high methylation levels, with a narrower distribution. Figure S9 shows a general  
432 overview of the CpG methylation patterns observed in all the 60 distinct GSs defined in our  
433 analysis. Taken together these findings indicate that a significant proportion of the BSC  
434 reads recovered by our targeted high throughput assay derive from off-target, hyper-  
435 methylated D4Z4-I regions. We also observed that when hg38 is considered as reference,  
436 the criteria we established for the T2T-based analysis (namely no missing data and

437 complete methylation profiles across all samples) identified only a single group, GS3 (primer  
438 D1) including 26 CpGs (Figure 4, Figure 5 and Table 4). In the light of these observations,  
439 methylation profiles inferred from T2T were considered more informative and were selected  
440 for subsequent analyses. Only primer D1 had complete data both in T2T and hg38 (Table  
441 4); however, CpG methylation levels estimated on hg38 were slightly more elevated  
442 compared to those observed on T2T at the equivalent target region (Figure S10, median  
443 values: 49.13 hg38, 43.75 T2T). An observation that might be consistent with discrepancies  
444 in the mapping of BSC reads on different genome assemblies.

445 Further, our analysis revealed that 4q/10q-specific methylation patterns at GS1 and  
446 GS2 stratified samples into 3 groups: low methylation (average CpG methylation 24%),  
447 intermediate methylation (average CpG methylation 48%), and high methylation (average  
448 CpG methylation 71%). The methylation pattern of GS5 and GS6 was highly uniform across  
449 all samples, with an average of 89%.

450 Interestingly, the observed methylation profiles did not correlate with the disease  
451 status. As shown in Figure 6A, of 16 samples presenting low methylation 10 (62.5%) derived  
452 from cases presenting the classical FSHD features (CCEF category A), 6 (37,5%) derived  
453 from cases presenting incomplete (2, CCEF clinical Category B) or complex (4, CCEF  
454 clinical category D) phenotypes. Of 16 samples, presenting intermediate methylation 9  
455 (56.3%) derived from cases assessed as clinical category A. Of 12 samples presenting high  
456 methylation 7 were from Category A cases (58.3%). Consistently, the methylation level  
457 distributions assessed in DNA from subjects presenting the CCEF clinical categories A, B  
458 and D was not statistically different (Figure S11). Instead, the majority (11/16) of participants  
459 in the low methylation group carried Pathogenic, Likely Pathogenic variants or Variants of  
460 Uncertain Significance according to ACMG classification<sup>60</sup> (P/LP/VUS variants) in *SMCHD1*  
461 (Fisher exact test p-value 0.0003). This association was confirmed by the comparison of the  
462 methylation profile distributions of *SMCHD1* P/LP/VUS variants carriers and non-carriers

463 (Figure 4, Kolmogorov-Smirnov test  $p$ -value  $\leq 1e-16$ ). Identical patterns were recovered  
464 also when methylation levels on the hg38 assembly were assessed with our approach  
465 (Figure 5).

466

## 467 **Discussion**

468

### 469 **The pangenome assemblies provide novel hints to evaluate the significance of the** 470 **D4Z4-like sequences in the clinical setting**

471 Thirty years ago, reduction below a critical threshold of the number of repeats belonging to  
472 the D4Z4 macrosatellite at 4q35 was causally associated with FSHD. D4Z4 is part a family  
473 of repetitive elements characteristic of heterochromatin and it was then known that many  
474 D4Z4-I were present in the human genome<sup>66</sup>. At that time, the lack of a complete genome  
475 assembly hampered the possibility of fully deciphering the significance of molecular and  
476 epigenetic findings in FSHD. Very recently, these limitations have been overcome by the  
477 availability of complete, high quality haplotype level genome assemblies. By analyzing the  
478 haplotypes from the PGR we collected relevant information on the size, the distribution and  
479 the composition of the D4Z4 locus, including distal sequence elements that are considered  
480 a hallmark of the FSHD molecular signature. We established that the number of 3.3 kb D4Z4  
481 repeats included in each array ranges from 6 RU to 89 RU<sup>40</sup>. We observed that the distance  
482 between the qA sequences and the last D4Z4 repeat varies. We also confirmed that qA  
483 sequences are more distal compared to qB sequences; the pLam sequence is in association  
484 with qA haplotypes<sup>18</sup>, and valid PAS is exclusively associated with 4q<sup>64</sup>; chr 10 D4Z4  
485 repeats were all marked by qA, with a single exception: a 10qB allele carrying 1 RU. Notably,  
486 PGR haplotype analysis confirmed the high frequency of the permissive 4qA-PAS  
487 haplotype, which is comparable to a common polymorphism<sup>61</sup>. In fact, in 4.6% of cases we  
488 identified permissive haplotypes consisting of reduced 4q D4Z4 arrays with  $\leq 8$  RU and the

489 4qA-PAS. Since all *ter-DUX4* and pLam sequence elements associated with 4qA alleles  
490 were found to be conserved and functionally intact, we speculate that disruptive genomic  
491 variants at the *ter-DUX4* are unlikely to account for the staggering discrepancy between the  
492 frequency of the presumed causative 4qA-PAS allele and the prevalence of FSHD.  
493 Furthermore, no skewed association has been detected between 4q D4Z4 arrays copy  
494 number and qA/B alleles<sup>19</sup>, indicating that non-permissive 4qB alleles and potentially  
495 permissive 4qA alleles do not have a different selective pressure for the maintenance of  
496 the physiological number of D4Z4 RU.

497 The consistency between data obtained from the analysis of PGR and previous  
498 observations<sup>6,61,66</sup> shows the validity of the PGR to advance knowledge of the molecular  
499 signature used to diagnose FSHD on a world-wide scale.

500 The PGR analysis also identified 6 haplotypes with peculiar annotations where 2 or  
501 more qA/qB probes were assigned to the same chromosome and none to the other  
502 chromosome (Table S9). This condition has been reported before<sup>62</sup> and is ascribable to the  
503 spreading of repetitive and polymorphic D4Z4-I at different loci of the genome<sup>63,67</sup>.

504 Our comparative analyses of complete D4Z4-I (Figure 2C) highlighted that D4Z4  
505 repeats, as well as the *ter-DUX4*, located at chr 4 present a higher variability compared to  
506 chr 10. In addition, PGR haplotypes from different ancestries showed different levels of  
507 variability in the number of complete D4Z4-I, with a significant difference in D4Z4 copy  
508 number between individuals of African ancestry, native Americans and far east Asians.

509

#### 510 **D4Z4 methylation assay must consider the T2T sequence for the identification of** 511 **4q/10q-specific CpGs**

512 Reduced CpG methylation at D4Z4 has been widely studied and proposed as a biomarker  
513 for the presence of FSHD. Previous studies of D4Z4 methylation presented some  
514 drawbacks: technical limitations and lack of reproducibility led to discordant results

515 regarding which regions are the most representative for D4Z4 methylation status<sup>20,32,68–74</sup>.  
516 In addition, the correlation between D4Z4 methylation level and FSHD clinical status has  
517 often been postulated, but different technical settings in the various studies, the lack of clear  
518 clinical evaluation of patients and the prominent absence of family studies had hindered the  
519 interpretation of results<sup>20,41,73,74</sup>. In the present work, we comprehensively evaluated the  
520 D4Z4 methylation status by considering a high number of reads and excluding technical  
521 biases introduced by the previous studies based on hg38 and on standard bioinformatics  
522 pipelines. We established (Figure S2) that the primer sets BSS-D1 and BSS-D6 identify  
523 CpG methylation signals deriving from 4q/10q-specific regions only, whereas the primer  
524 sets BSS-D3 and BSS-D5 amplify D4Z4-I distributed not only at 4q and 10q but also on  
525 chromosome 1 and on the short arms of acrocentric chromosomes. Thus, the study of D4Z4  
526 CpG methylation can be hazardous if the distribution of D4Z4-I elements and their variability  
527 are not correctly taken into account.

528         Despite all this, the application of short read-based assays for the analysis of  
529 repetitive elements of relatively large size has limitations. When non-converted reads were  
530 aligned to both hg38 and T2T, more than 50% of mapped reads did not align at expected  
531 target regions. Nevertheless, the total fraction of mapped reads and the number of testable  
532 CpGs were higher when aligned to T2T compared to hg38, confirming that T2T provides a  
533 more accurate representation of the human genome. We can anticipate that long read  
534 sequencing technologies, such as Oxford Nanopore, will provide relevant technical  
535 advances and open new possibilities for the study of repetitive elements' organization and  
536 function in the genome. In this respect, Butterfield and colleagues (2023)<sup>75</sup> applied targeted  
537 nanopore sequencing to FSHD patients and healthy subjects and showed that an  
538 asymmetric methylation gradient forms in a length-dependent manner at the proximal end  
539 of the D4Z4 repeat array reaching saturation approximately at the 10th repeat. They also  
540 observed a highly similar methylation pattern at 4q and 10q which was irrespective of the

541 clinical phenotype (FSHD or healthy)<sup>75</sup>. This notwithstanding, at present, long-read  
542 sequencing technologies are not mature for systematic large-scale applications in the  
543 clinical settings. Instead, the targeted CpG methylation analysis we set up is manageable  
544 on a large scale as it follows a simple protocol, is less expensive and highly reproducible.  
545 Remarkably, our data are consistent with the results obtained by Butterfield and colleagues.

546

#### 547 **D4Z4 CpG methylation level is not a predictor of FSHD disease**

548 Beside the formal demonstration that primer design is a crucial point in the analysis of D4Z4  
549 methylation, our study also revealed that contrary to common knowledge<sup>20</sup>, not all DNAs  
550 from myopathic patients referred as FSHD2 (26 index cases) presented a low methylation  
551 level. Our analysis identified three clusters with low, intermediate and high D4Z4 CpG  
552 methylation (mean at 24%, 48% and 71% respectively). Figure 6 depicts the results of  
553 several comparisons regarding the following parameters: clinical phenotype, D4Z4  
554 methylation level and *SMCHD1* mutational status. Figure 6A shows that some genotype-  
555 phenotype intersections are not in agreement with the current indications for FSHD  
556 diagnosis<sup>76,77</sup>. Remarkably, we observed the full range of D4Z4 methylation levels in DNA  
557 from the 26 participants presenting a classical FSHD phenotype (CCEF Clinical Category  
558 A); of those 16 carriers of a damaging *SMCHD1* variant, 11 presented low 4q/10q-specific  
559 D4Z4 CpG methylation, 5 displayed intermediate CpG methylation. We also observed 5  
560 samples with low CpG methylation with no damaging *SMCHD1* or *DNMT3B* or *LRIF1*  
561 variants and presenting classical (2), incomplete (1) or complex (2) phenotypes. underlying  
562 the genetic heterogeneity of this molecular phenotype.

563 The variants we identified were distributed all along *SMCHD1* gene body and did not  
564 provide information on specific *SMCHD1* region/domain that might account for the reduced  
565 methylation at 4q/10q-specific D4Z4 sequences (Figure 6B).



566 To further explore this aspect, we investigated genotype-phenotype correlation in  
567 eight trios/parent-child pairs participating to this study (Figure 6C, Table S7). We observed  
568 participants presenting the classical FSHD phenotype (CCEF Category A), healthy subjects  
569 (CCEF Category C) or complex phenotypes presenting atypical features (CCEF Category  
570 D). According to our data, only in families 1 and 26 subjects presenting a classic FSHD  
571 phenotype displayed a reduced CpG methylation profile and carried a damaging  
572 heterozygous *SMCHD1* variant. In family 22 the classic clinical phenotype, in presence of  
573 D4Z4 reduced methylation, was not associated with variants in known chromatin modifiers.  
574 In family 8 the probands presented the classic clinical phenotype associated with  
575 intermediate D4Z4 methylation level in presence of a damaging *SMCHD1* variant, as the  
576 healthy mother. In family 27 the proband presented the Category A phenotype associated  
577 with reduced CpG methylation and a damaging *SMCHD1* variant, whereas intermediate  
578 D4Z4 methylation level was detected in the healthy father carrying the same *SMCHD1*  
579 allele. In family 30 father and daughter presented a complex phenotype with atypical clinical  
580 symptoms (Category D1); both reported clinical onset at pelvic girdle and distal lower limbs.  
581 They were heterozygous for *SMCHD1* damaging variant and presented reduced D4Z4 CpG  
582 methylation. In families 9 both the probands and her father presented Category A phenotype  
583 without displaying reduced D4Z4 CpG methylation and carrying WT *SMCHD1* alleles, as  
584 the proband in family 11.

585 Altogether, these results suggest that *SMCHD1* modulates, directly or indirectly,  
586 D4Z4 methylation at 4q and 10q, at the same time it seems that deleterious variants at  
587 *SMCHD1* are not sufficient for the pathogenesis of FSHD and cannot be considered faithful  
588 indicators of FSHD clinical status.

589 In conclusion, our work uncovered the complexity of the genomic setting of D4Z4-I  
590 and showed that a molecular diagnostic test for FSHD2 based on *SMCHD1* inactivation and  
591 D4Z4 hypomethylation must follow rigorous protocols to avoid biased interpretation.

592 Molecular analysis should be considered together with precise clinical assessment and  
593 complemented by family studies for the proper interpretation of results. Moreover, the  
594 variability unveiled by our analysis should warn about the risk of relying on a single ideal  
595 reference genome sequence in FSHD. In fact, this simplification could strongly narrow our  
596 capacity of observing the variability ascribable to each single human genome producing  
597 biased interpretations of sequencing data. Finally, our study indicates that a linear approach  
598 to diagnose FSHD is obsolete and novel genomic approaches integrated with the precise  
599 phenotypic description of patients and their families are needed for the comprehension of  
600 the molecular network leading to muscle wasting in FSHD.

601

## 602 **Declarations**

603

## 604 **Acknowledgements**

605 We are grateful to Francesca Brocco for contributing to the molecular analysis. In addition,  
606 we are indebted to all FSHD patients and their families for participating in this study. We  
607 acknowledge the Fondazione di Modena for FAR-FOMO 2021 grant funding this work.

608

## 609 **Authors' contributions**

610 RGT, VS, MC conceived the study concept and supervised the project; VS, SP conducted  
611 the molecular analysis; MC conducted bioinformatics analysis; PK and MK contributed to  
612 bioinformatic analysis; LR, SCP, MGD, CR, SB, LM, DL contributed to the patients clinical  
613 analysis and sample collection; FMS, GP contributed to results discussion; RGT, VS, MC,  
614 SP wrote the paper (original draft); all authors read and approved the final manuscript.

615

## 616 **Declaration of interests**

617 The authors declare no competing interests.

618

## 619 **Web sources**

620 The PGR dataset analyzed during the current study is available at

621 [https://github.com/human-pangenomics/HPP\\_Year1\\_Assemblies](https://github.com/human-pangenomics/HPP_Year1_Assemblies).

622

## 623 **Availability of data and materials**

624 Data generated and/or analyzed during the current study and not included in this  
625 published article are available from the corresponding author on reasonable request.

626

## 627 **Ethics approval and consent to participate**

628 Signed informed consent was obtained from all the subjects prior to the inclusion in the  
629 study. The study was approved by the ethics committee of Emilia Romagna Area Vasta  
630 Nord 743/2022/OSS/UNIMO SIRER ID 5111.

631

## 632 **References**

633

- 634 1. Deenen, J.C.W., Arnts, H., Van Der Maarel, S.M., Padberg, G.W., Verschuuren, J.J.G.M.,  
635 Bakker, E., Weinreich, S.S., Verbeek, A.L.M., and Van Engelen, B.G.M. (2014). Population-  
636 based incidence and prevalence of facioscapulohumeral dystrophy. *Neurology* 83, 1056–  
637 1059. 10.1212/WNL.0000000000000797.
- 638 2. Mostacciuolo, M.L., Pastorello, E., Vazza, G., Miorin, M., Angelini, C., Tomelleri, G., Galluzzi,  
639 G., and Trevisan, C. Pietro (2009). Facioscapulohumeral muscular dystrophy:  
640 Epidemiological and molecular study in a north-east Italian population sample. *Clinical*  
641 *Genetics* 75, 550–555. 10.1111/j.1399-0004.2009.01158.x.
- 642 3. Dumbovic, G., Forcales, S. V., and Perucho, M. (2017). Emerging roles of macrosatellite  
643 repeats in genome organization and disease development. *Epigenetics* 12, 515–526.  
644 10.1080/15592294.2017.1318235.
- 645 4. Lunt, P.W. (1998). 44th ENMC International Workshop: Facioscapulohumeral muscular  
646 dystrophy: Molecular studies, 19-21 July 1996, Naarden, The Netherlands. *Neuromuscular*  
647 *Disorders* 8, 126–130. 10.1016/S0960-8966(98)00012-1.

- 648 5. Hewitt, J.E., Lyle, R., Clark, L.N., Valleley, E.M., Wright, T.J., Wijmenga, C., Van Deutekom, J.C.  
649 t., Francis, F., Sharpe, P.T., Hofker, M., et al. (1994). Analysis of the tandem repeat locus  
650 D4Z4 associated with facioscapulohumeral muscular dystrophthyy. *Human Molecular*  
651 *Genetics* 3, 1287–1295. 10.1093/hmg/3.8.1287.
- 652 6. Winokur, S.T., Bengtsson, U., Feddersen, J., Mathews, K.D., Weiffenbach, B., Bailey, H.,  
653 Markovich, R.P., Murray, J.C., Wasmuth, J.J., Altherr, M.R., et al. (1994). The DNA  
654 rearrangement associated with facioscapulohumeral muscular dystrophy involves a  
655 heterochromatin-associated repetitive element: Implications for a role of chromatin  
656 structure in the pathogenesis of the disease. *Chromosome Research* 2, 225–234.  
657 10.1007/BF01553323.
- 658 7. Zhang, X.Y., Loflin, P.T., Gehrke, C.W., Andrews, P.A., and Ehrlich, M. (1987).  
659 Hypermethylation of human DNA sequences in embryonal carcinoma cells and somatic  
660 tissues but not in sperm. *Nucleic Acids Research* 15, 9429–9449.  
661 10.1093/nar/15.22.9429.
- 662 8. Agresti, A., Meneveri, R., Siccardi, A.G., Marozzi, A., Corneo, G., Gaudi, S., and Ginelli, E.  
663 (1989). Linkage in human heterochromatin between highly divergent Sau3A repeats and  
664 a new family of repeated DNA sequences (HaeIII family). *Journal of Molecular Biology* 205,  
665 625–631. 10.1016/0022-2836(89)90308-2.
- 666 9. Meneveri, R., Agresti, A., Marozzi, A., Saccone, S., Rocchi, M., Archidiacono, N., Corneo, G.,  
667 Valle, G.D., and Ginelli, E. (1993). Molecular organization and chromosomal location of  
668 human GC-rich heterochromatic blocks. *Gene* 123, 227–234. 10.1016/0378-  
669 1119(93)90128-P.
- 670 10. Deidda, G., Cacurri, S., Grisanti, P., Vigneti, E., Piazzo, N., and Felicetti, L. (1995). Physical  
671 mapping evidence for a duplicated region on chromosome 10qter showing high homology  
672 with the facioscapulohumeral muscular dystrophy locus on chromosome 4qter. *European*  
673 *Journal of Human Genetics* 3, 155–167. 10.1159/000472291.
- 674 11. Deutekom, J.C.T. van, Wljmenga, C., Tlenhoven, E.A.E. van, Gruter, A.M., Hewitt, J.E.,  
675 Padberg, G.W., van Ommen, G.J.B., Hofker, M.H., and Fronts, R.R. (1993). FSHD associated  
676 DNA rearrangements are due to deletions of integral copies of a 3.2 kb tandemly repeated  
677 unit. *Human Molecular Genetics* 2, 2037–2042. 10.1093/hmg/2.12.2037.
- 678 12. Gabellini, D., Green, M.R., and Tupler, R. (2002). Inappropriate gene activation in FSHD: A  
679 repressor complex binds a chromosomal repeat deleted in dystrophic muscle. *Cell* 110,  
680 339–348. 10.1016/S0092-8674(02)00826-7.
- 681 13. Cabianca, D.S., Casa, V., Bodega, B., Xynos, A., Ginelli, E., Tanaka, Y., and Gabellini, D.  
682 (2012). A long ncRNA links copy number variation to a polycomb/trithorax epigenetic  
683 switch in fshd muscular dystrophy. *Cell* 149, 819–831. 10.1016/j.cell.2012.03.035.
- 684 14. Laoudj-Chenivresse, D., Carnac, G., Bisbal, C., Hugon, G., Bouillot, S., Desnuelle, C., Vassetzky,  
685 Y., and Fernandez, A. (2005). Increased levels of adenine nucleotide translocator 1 protein  
686 and response to oxidative stress are early events in facioscapulohumeral muscular  
687 dystrophy muscle. *Journal of molecular medicine (Berlin, Germany)* 83, 216–224.  
688 10.1007/s00109-004-0583-7.

- 689 15. Lemmers, R.J.L.F., Tawil, R., Petek, L.M., Balog, J., Block, G.J., Santen, G.W.E., Amell, A.M.,  
690 Vliet, P.J. Van Der, Almomani, R., Straasheijm, R., et al. (2012). Digenic inheritance of an  
691 SMCHD1 mutation and an FSHD-permissive D4Z4 allele causes facioscapulohumeral  
692 muscular dystrophy type 2. *Nat Genet.* 44, 1370–1374. 10.1038/ng.2454.Digenic.
- 693 16. Van Den Boogaard, M.L., Lemmers, R.J.L.F., Balog, J., Wohlgemuth, M., Auranen, M.,  
694 Mitsuhashi, S., Van Der Vliet, P.J., Straasheijm, K.R., Van Den Akker, R.F.P., Kriek, M., et al.  
695 (2016). Mutations in DNMT3B Modify Epigenetic Repression of the D4Z4 Repeat and the  
696 Penetrance of Facioscapulohumeral Dystrophy. *American Journal of Human Genetics* 98,  
697 1020–1029. 10.1016/j.ajhg.2016.03.013.
- 698 17. Hamanaka, K., Šikrová, D., Mitsuhashi, S., Masuda, H., Sekiguchi, Y., Sugiyama, A., Shibuya,  
699 K., Lemmers, R.J.L.F., Goossens, R., Ogawa, M., et al. (2020). Homozygous nonsense variant  
700 in LRIF1 associated with facioscapulohumeral muscular dystrophy. *Neurology* 94, E2441–  
701 E2447. 10.1212/WNL.0000000000009617.
- 702 18. Van Geel, M., Dickson, M.C., Beck, A.F., Bolland, D.J., Frants, R.R., Van der Maarel, S.M., De  
703 Jong, P.J., and Hewitt, J.E. (2002). Genomic analysis of human chromosome 10q and 4q  
704 telomeres suggests a common origin. *Genomics* 79, 210–217. 10.1006/geno.2002.6690.
- 705 19. Lemmers, R.J.L.F., de Kievit, P., Sandkuijl, L., Padberg, G.W., van Ommen, G.J.B., Frants, R.R.,  
706 and van der Maarel, S.M. (2002). Facioscapulohumeral muscular dystrophy is uniquely  
707 associated with one of the two variants of the 4q subtelomere. *Nature Genetics* 32, 235–  
708 236. 10.1038/ng999.
- 709 20. Gould, T., Jones, T.I., and Jones, P.L. (2021). Precise epigenetic analysis using targeted  
710 bisulfite genomic sequencing distinguishes fshd1, fshd2, and healthy subjects. *Diagnostics*  
711 11, 1–17. 10.3390/diagnostics11081469.
- 712 21. Ricci, G., Scionti, I., Sera, F., Govi, M., D’Amico, R., Frambolli, I., Mele, F., Filosto, M., Vercelli,  
713 L., Ruggiero, L., et al. (2013). Large scale genotype-phenotype analyses indicate that novel  
714 prognostic tools are required for families with facioscapulohumeral muscular dystrophy.  
715 *Brain* 136, 3408–3417. 10.1093/brain/awt226.
- 716 22. K Goto, I Nishino, Y.K.H. (2004). Very low penetrance in 85 Japanese families with  
717 facioscapulohumeral muscular dystrophy 1A K. *J Med Genet* 41.  
718 10.4324/9780203994559-14.
- 719 23. Wu, Z.Y., Wang, Z.Q., Murong, S.X., and Wang, N. (2004). FSHD in Chinese population:  
720 Characteristics of translocation and genotype-phenotype correlation. *Neurology* 63, 581–  
721 583. 10.1212/01.WNL.0000133210.93075.81.
- 722 24. Nikolic, A., Ricci, G., Sera, F., Bucci, E., Govi, M., Mele, F., Rossi, M., Ruggiero, L., Vercelli, L.,  
723 Ravaglia, S., et al. (2016). Clinical expression of facioscapulohumeral muscular dystrophy  
724 in carriers of 1-3 D4Z4 reduced alleles: Experience of the FSHD Italian National Registry.  
725 *BMJ Open* 6, 1–10. 10.1136/bmjopen-2015-007798.
- 726 25. Nakagawa, M., Matsuzaki, T., Higuchi, I., Fukunaga, H., Inui, T., Nagamitsu, S., Yamada, H.,  
727 Arimura, K., and Osame, M. (1997). Facioscapulohumeral Muscular Dystrophy: Clinical  
728 Diversity and Genetic Abnormalities in Japanese Patients. *Internal Medicine* 36, 333–339.  
729 10.2169/internalmedicine.36.333.

- 730 26. Sakellariou, P., Kekou, K., Fryssira, H., Sofocleous, C., Manta, P., Panousopoulou, A.,  
731 Gounaris, K., and Kanavakis, E. (2012). Mutation spectrum and phenotypic manifestation  
732 in FSHD Greek patients. *Neuromuscular Disorders* 22, 339–349.  
733 10.1016/j.nmd.2011.11.001.
- 734 27. Salort-Campana, E., Nguyen, K., Bernard, R., Jouve, E., Solé, G., Nadaj-Pakleza, A.,  
735 Niederhauser, J., Charles, E., Ollagnon, E., Bouhour, F., et al. (2015). Low penetrance in  
736 facioscapulohumeral muscular dystrophy type 1 with large pathological D4Z4 alleles: A  
737 cross-sectional multicenter study. *Orphanet Journal of Rare Diseases* 10, 4–11.  
738 10.1186/s13023-014-0218-1.
- 739 28. Ricci, G., Ruggiero, L., Vercelli, L., Sera, F., Nikolic, A., Govi, M., Mele, F., Daolio, J., Angelini,  
740 C., Antonini, G., et al. (2016). A novel clinical tool to classify facioscapulohumeral muscular  
741 dystrophy phenotypes. *Journal of Neurology* 263, 1204–1214. 10.1007/s00415-016-  
742 8123-2.
- 743 29. Lamperti, C., Fabbri, G., Vercelli, L., D’Amico, R., Frusciante, R., Bonifazi, E., Fiorillo, C.,  
744 Borsato, C., Cao, M., Servida, M., et al. (2010). A standardized clinical evaluation of patients  
745 affected by facioscapulohumeral muscular dystrophy: The FSHD clinical score. *Muscle and*  
746 *Nerve* 42, 213–217. 10.1002/mus.21671.
- 747 30. Ruggiero, L., Mele, F., Manganelli, F., Bruzzese, D., Ricci, G., Vercelli, L., Govi, M., Vallarola,  
748 A., Tripodi, S., Villa, L., et al. (2020). Phenotypic Variability Among Patients With D4Z4  
749 Reduced Allele Facioscapulohumeral Muscular Dystrophy. *JAMA network open* 3,  
750 e204040. 10.1001/jamanetworkopen.2020.4040.
- 751 31. Vercelli, L., Mele, F., Ruggiero, L., Sera, F., Tripodi, S., Ricci, G., Vallarola, A., Villa, L., Govi,  
752 M., Maranda, L., et al. (2021). A 5-year clinical follow-up study from the Italian National  
753 Registry for FSHD. *Journal of Neurology* 268, 356–366. 10.1007/s00415-020-10144-7.
- 754 32. Nikolic, A., Jones, T.I., Govi, M., Mele, F., Maranda, L., Sera, F., Ricci, G., Ruggiero, L., Vercelli,  
755 L., Portaro, S., et al. (2020). Interpretation of the epigenetic signature of  
756 facioscapulohumeral muscular dystrophy in light of genotype-phenotype studies.  
757 *International Journal of Molecular Sciences* 21. 10.3390/ijms21072635.
- 758 33. Ricci, G., Cammish, P., Siciliano, G., Tupler, R., Lochmuller, H., and Evangelista, T. (2019).  
759 Phenotype may predict the clinical course of facioscapulohumeral muscular dystrophy.  
760 *Muscle and Nerve* 59, 711–713. 10.1002/mus.26474.
- 761 34. Ricci, G., Mele, F., Govi, M., Ruggiero, L., Sera, F., Vercelli, L., Bettio, C., Santoro, L., Mongini,  
762 T., Villa, L., et al. (2020). Large genotype–phenotype study in carriers of D4Z4 borderline  
763 alleles provides guidance for facioscapulohumeral muscular dystrophy diagnosis.  
764 *Scientific Reports* 10, 1–12. 10.1038/s41598-020-78578-7.
- 765 35. He, J.J., Lin, X.D., Lin, F., Xu, G.R., Xu, L.Q., Hu, W., Wang, D.N., Lin, H.X., Lin, M.T., Wang, N., et  
766 al. (2018). Clinical and genetic features of patients with facial-sparing  
767 facioscapulohumeral muscular dystrophy. *European Journal of Neurology* 25, 356–364.  
768 10.1111/ene.13509.
- 769 36. Wang, Z., Qiu, L., Lin, M., Chen, L., Zheng, F., Lin, L., Lin, F., Ye, Z., Lin, X., He, J., et al. (2022).  
770 Prevalence and disease progression of genetically-confirmed facioscapulohumeral  
771 muscular dystrophy type 1 (FSHD1) in China between 2001 and 2020: a nationwide



- 772 population-based study. *The Lancet regional health. Western Pacific* 18, 100323.  
773 [10.1016/j.lanwpc.2021.100323](https://doi.org/10.1016/j.lanwpc.2021.100323).
- 774 37. Salsia, V., Vatteemi, G.N.A., and Tupler, R.G. (2023). The FSHD jigsaw: are we placing the  
775 tiles in the right position? *Curr Opin Neurol*. [10.1097/WCO.0000000000001176](https://doi.org/10.1097/WCO.0000000000001176).
- 776 38. Wohlgenuth, M., Lemmers, R.J., Van der Kooi, E.L., Van der Wielen, M.J., Van Overveld, P.G.,  
777 Dauwerse, H., Bakker, E., Frants, R.R., Padberg, G.W., and Van der Maarel, S.M. (2003).  
778 Possible phenotypic dosage effect in patients compound heterozygous for FSHD-sized  
779 4q35 alleles. *Neurology* 61, 909–913. [10.1212/WNL.61.7.909](https://doi.org/10.1212/WNL.61.7.909).
- 780 39. Scionti, I., Greco, F., Ricci, G., Govi, M., Arashiro, P., Vercelli, L., Berardinelli, A., Angelini, C.,  
781 Antonini, G., Cao, M., et al. (2012). Large-scale population analysis challenges the current  
782 criteria for the molecular diagnosis of fascioscapulohumeral muscular dystrophy.  
783 *American Journal of Human Genetics* 90, 628–635. [10.1016/j.ajhg.2012.02.019](https://doi.org/10.1016/j.ajhg.2012.02.019).
- 784 40. Van Overveld, P.G.M., Lemmers, R.J.F.L., Deidda, G., Sandkuijl, L., Padberg, G.W., Frants,  
785 R.R., and Van Der Maarel, S.M. (2000). Interchromosomal repeat array interactions  
786 between chromosomes 4 and 10: A model for subtelomeric plasticity. *Human Molecular*  
787 *Genetics* 9, 2879–2884. [10.1093/hmg/9.19.2879](https://doi.org/10.1093/hmg/9.19.2879).
- 788 41. Salsi, V., Magdinier, F., and Tupler, R. (2020). Does DNA methylation matter in FSHD?  
789 *Genes* 11. [10.3390/genes11030258](https://doi.org/10.3390/genes11030258).
- 790 42. Wang, T., Antonacci-Fulton, L., Howe, K., Lawson, H.A., Lucas, J.K., Phillippy, A.M., Popejoy,  
791 A.B., Asri, M., Carson, C., Chaisson, M.J.P., et al. (2022). The Human Pangenome Project: a  
792 global resource to map genomic diversity. *Nature* 604, 437–446. [10.1038/s41586-022-](https://doi.org/10.1038/s41586-022-04601-8)  
793 [04601-8](https://doi.org/10.1038/s41586-022-04601-8).
- 794 43. Bettio, C., Salsi, V., Orsini, M., Calanchi, E., Magnotta, L., Gagliardelli, L., Kinoshita, J.,  
795 Bergamaschi, S., and Tupler, R. (2021). The Italian National Registry for FSHD: an  
796 enhanced data integration and an analytics framework towards Smart Health Care and  
797 Precision Medicine for a rare disease. *Orphanet Journal of Rare Diseases* 16, 1–21.  
798 [10.1186/s13023-021-02100-z](https://doi.org/10.1186/s13023-021-02100-z).
- 799 44. Li, L.C., and Dahiya, R. (2002). MethPrimer: Designing primers for methylation PCRs.  
800 *Bioinformatics* 18, 1427–1431. [10.1093/bioinformatics/18.11.1427](https://doi.org/10.1093/bioinformatics/18.11.1427).
- 801 45. Altschup, S.F., Gish, W., Pennsylvania, T., and Park, U. (1990). Basic Local Alignment  
802 Search Tool 2Department of Computer Science. 403–410.
- 803 46. Lassmann, T. (2020). Kalign 3: Multiple sequence alignment of large datasets.  
804 *Bioinformatics* 36, 1928–1929. [10.1093/bioinformatics/btz795](https://doi.org/10.1093/bioinformatics/btz795).
- 805 47. Castresana, J. (2000). Selection of conserved blocks from multiple alignments for their use  
806 in phylogenetic analysis. *Molecular Biology and Evolution* 17, 540–552.  
807 [10.1093/oxfordjournals.molbev.a026334](https://doi.org/10.1093/oxfordjournals.molbev.a026334).
- 808 48. Rice, P., Longden, L., and Bleasby, A. (2000). EMBOSS: The European Molecular Biology  
809 Open Software Suite. *Trends in Genetics* 16, 276–277. [10.1016/S0168-9525\(00\)02024-2](https://doi.org/10.1016/S0168-9525(00)02024-2).
- 810 49. Tajima, F., and Nei, M. (1984). Estimation of evolutionary distance between nucleotide  
811 sequences. *Molecular Biology and Evolution* 1, 269–285.



- 812 50. R Core Team (2020). R: A language and environment for statistical computing. R  
813 Foundation for Statistical Computing, Vienna, Austria. <https://www.r-project.org/>.
- 814 51. Andrews, S. (2010). FastQC: A Quality Control Tool for High Throughput Sequence Data.  
815 <http://www.bioinformatics.babraham.ac.uk/projects/fastqc/>.
- 816 52. FastQC (2015). <https://qubeshub.org/resources/fastqc>.
- 817 53. Ewels, P., Lundin, S., and Max, K. (2016). Data and text mining MultiQC : summarize  
818 analysis results for multiple tools and samples in a single report. *32*, 3047–3048.  
819 10.1093/bioinformatics/btw354.
- 820 54. Langmead, B., and Salzberg, S.L. (2012). Fast gapped-read alignment with Bowtie 2.  
821 *Nature Methods* *9*, 357–359. 10.1038/nmeth.1923.
- 822 55. Quinlan, A.R., and Hall, I.M. (2010). BEDTools : a flexible suite of utilities for comparing  
823 genomic features. *26*, 841–842. 10.1093/bioinformatics/btq033.
- 824 56. Krueger, F., and Andrews, S.R. (2011). Bismark: A flexible aligner and methylation caller  
825 for Bisulfite-Seq applications. *Bioinformatics* *27*, 1571–1572.  
826 10.1093/bioinformatics/btr167.
- 827 57. Chang, X.; Wang, K. (2008). wANNOVAR: annotating genetic variants for personal  
828 genomes via the web. *Journal of Human Genetics* *6*, 2166–2171. 10.1136/jmedgenet-  
829 2012-100918.wANNOVAR.
- 830 58. Chen, K., Hu, J., Moore, D.L., Liu, R., Kessans, S.A., Breslin, K., Lucet, I.S., Keniry, A., Leong,  
831 H.S., Parish, C.L., et al. (2015). Genome-wide binding and mechanistic analyses of Smchd1-  
832 mediated epigenetic regulation. *Proceedings of the National Academy of Sciences of the*  
833 *United States of America* *112*, E3535–E3544. 10.1073/pnas.1504232112.
- 834 59. Kopanos, C., Tsiolkas, V., Kouris, A., Chapple, C.E., Albarca Aguilera, M., Meyer, R., and  
835 Massouras, A. (2019). VarSome: the human genomic variant search engine. *Bioinformatics*  
836 *35*, 1978–1980. 10.1093/bioinformatics/bty897.
- 837 60. Richards S, Aziz N, Bale S, Bick D, Das S, Gastier-Foster J, Grody WW, Hegde M, Lyon E,  
838 Spector E, Voelkerding K, R.H., and Committee, A.L.Q.A. (2015). Standards and guidelines  
839 for the interpretation of sequence variants: a joint consensus recommendation of the  
840 American College of Medical Genetics and Genomics and the Association for Molecular  
841 Pathology. *Genet Med* *17*, 405–424. 10.1038/gim.2015.30.
- 842 61. Scionti, I., Greco, F., Ricci, G., Govi, M., Arashiro, P., Vercelli, L., Berardinelli, A., Angelini, C.,  
843 Antonini, G., Cao, M., et al. (2012). Large-scale population analysis challenges the current  
844 criteria for the molecular diagnosis of fascioscapulohumeral muscular dystrophy.  
845 *American Journal of Human Genetics* *90*, 628–635. 10.1016/j.ajhg.2012.02.019.
- 846 62. Delourme, M., Charlene, C., Gerard, L., Ganne, B., Perrin, P., Vovan, C., Bertaux, K., Nguyen,  
847 K., and Magdinier, F. (2023). Complex 4q35 and 10q26 Rearrangements.  
848 10.1212/NXG.000000000200076.
- 849 63. Cacurri, S., Piazzo, N., Deidda, G., Vigneti, E., Galluzzi, G., Colantoni, L., Merico, B., Ricci, E.,  
850 and Felicetti, L. (1998). Sequence homology between 4qter and 10qter loci facilitates the

- 851 instability of subtelomeric KpnI repeat units implicated in facioscapulohumeral muscular  
852 dystrophy. *American Journal of Human Genetics* 63, 181–190. 10.1086/301906.
- 853 64. Lemmers, R.J.L.F., van der Vliet, P.J., van der Gaag, K.J., Zuniga, S., Frants, R.R., de Knijff, P.,  
854 and van der Maarel, S.M. (2010). Worldwide Population Analysis of the 4q and 10q  
855 Subtelomeres Identifies Only Four Discrete Interchromosomal Sequence Transfers in  
856 Human Evolution. *American Journal of Human Genetics* 86, 364–377.  
857 10.1016/j.ajhg.2010.01.035.
- 858 65. de Greef, J.C., Lemmers, R.J.L.F., van Engelen, B.G.M., Sacconi, S., Venance, S.L., Frants, R.R.,  
859 Tawil, R., and van der Maarel, S.M. (2009). Common epigenetic changes of D4Z4 in  
860 contraction-dependent and contraction-independent FSHD. *Human Mutation* 30, 1449–  
861 1459. 10.1002/humu.21091.
- 862 66. Hewitt, J.E., Lyle, R., Clark, L.N., Valleley, E.M., Wright, T.J., Wijmenga, C., Van Deutekom, J.C.  
863 t., Francis, F., Sharpe, P.T., Hofker, M., et al. (1994). Analysis of the tandem repeat locus  
864 D4Z4 associated with facioscapulohumeral muscular dystrophthhy. *Human Molecular*  
865 *Genetics* 3, 1287–1295. 10.1093/hmg/3.8.1287.
- 866 67. Pini, S., Napoli, F.M., Tagliafico, E., La Marca, A., Bertucci, E., Salsi, V., and Tupler, R. (2023).  
867 De novo variants and recombination at 4q35: Hints for preimplantation genetic testing in  
868 facioscapulohumeral muscular dystrophy. *Clinical Genetics* 103, 242–246.  
869 10.1111/cge.14250.
- 870 68. Gaillard, M.C., Roche, S., Dion, C., Tasmadjian, A., Bouget, G., Salort-Campana, E., Vovan, C.,  
871 Chaix, C., Broucqsault, N., Morere, J., et al. (2014). Differential DNA methylation of the  
872 D4Z4 repeat in patients with FSHD and asymptomatic carriers. *Neurology* 83, 733–742.  
873 10.1212/WNL.0000000000000708.
- 874 69. Lemmers, R.J.L.F., Goeman, J.J., Van der Vliet, P.J., Van Nieuwenhuizen, M.P., Balog, J., Vos-  
875 Versteeg, M., Camano, P., Ramos Arroyo, M.A., Jerico, I., Rogers, M.T., et al. (2015). Inter-  
876 individual differences in CpG methylation at D4Z4 correlate with clinical variability in  
877 FSHD1 and FSHD2. *Human Molecular Genetics* 24, 659–669. 10.1093/hmg/ddu486.
- 878 70. Jones, T.I., King, O.D., Himeda, C.L., Homma, S., Chen, J.C.J., Beermann, M. Lou, Yan, C.,  
879 Emerson, C.P., Miller, J.B., Wagner, K.R., et al. (2015). Individual epigenetic status of the  
880 pathogenic D4Z4 macrosatellite correlates with disease in facioscapulohumeral muscular  
881 dystrophy. *Clinical Epigenetics* 7, 1–22. 10.1186/s13148-015-0072-6.
- 882 71. Calandra, P., Cascino, I., Lemmers, R.J.L.F., Galluzzi, G., Teveroni, E., Monforte, M., Tasca, G.,  
883 Ricci, E., Moretti, F., Van Der Maarel, S.M., et al. (2016). Allele-specific DNA  
884 hypomethylation characterises FSHD1 and FSHD2. *Journal of Medical Genetics* 53, 348–  
885 355. 10.1136/jmedgenet-2015-103436.
- 886 72. Dion, C., Roche, S., Laberthonnière, C., Broucqsault, N., Mariot, V., Xue, S., Gurzau, A.D.,  
887 Nowak, A., Gordon, C.T., Gaillard, M.C., et al. (2019). SMCHD1 is involved in de novo  
888 methylation of the DUX4-encoding D4Z4 macrosatellite. *Nucleic Acids Research* 47, 2822–  
889 2839. 10.1093/nar/gkz005.
- 890 73. Hiramuki, Y., Kure, Y., Saito, Y., Ogawa, M., Ishikawa, K., Yoshimura, M.M., Oya, Y.,  
891 Takahashi, Y., Kim, D.S., Arai, N., et al. (2022). Simultaneous measurement of the size and  
892 methylation of chromosome 4qA - D4Z4 repeats in facioscapulohumeral muscular

- 893 dystrophy by long - read sequencing. *Journal of Translational Medicine*, 1–12.  
894 [10.1186/s12967-022-03743-7](https://doi.org/10.1186/s12967-022-03743-7).
- 895 74. Erdmann, H., Scharf, F., Gehling, S., Benet-Pagès, A., Jakubiczka, S., Becker, K., Seipelt, M.,  
896 Kleefeld, F., Knop, K.C., Prott, E.-C., et al. (2023). Methylation of the 4q35 D4Z4 repeat  
897 defines disease status in facioscapulohumeral muscular dystrophy. *Brain* *146*, 1388–1402.  
898 [10.1093/brain/awac336](https://doi.org/10.1093/brain/awac336).
- 899 75. Butterfield, R.J., Dunn, D.M., Duvall, B., Moldt, S., and Weiss, R.B. (2023). Deciphering D4Z4  
900 CpG methylation gradients in facioscapulohumeral muscular dystrophy using nanopore  
901 sequencing. *bioRxiv : the preprint server for biology*. [10.1101/2023.02.17.528868](https://doi.org/10.1101/2023.02.17.528868).
- 902 76. Lemmers, R.J.L.F., Wohlgemuth, M., Van Der Gaag, K.J., Van Der Vliet, P.J., Van Teijlingen,  
903 C.M.M., De Knijff, P., Padberg, G.W., Frants, R.R., and Van Der Maarel, S.M. (2007). Specific  
904 sequence variations within the 4q35 region are associated with facioscapulohumeral  
905 muscular dystrophy. *American Journal of Human Genetics* *81*, 884–894. [10.1086/521986](https://doi.org/10.1086/521986).
- 906 77. Tawil, R., Kissel, J.T., Heatwole, C., Pandya, S., Gronseth, G., and Benatar, M. (2015).  
907 Evidence-based guideline summary: Evaluation, diagnosis, and management of  
908 facioscapulohumeral muscular dystrophy. *Neurology* *85*, 357–364.  
909 [10.1212/WNL.0000000000001783](https://doi.org/10.1212/WNL.0000000000001783).

910

## 911 **Figure titles and legends**

912

### 913 **Figure 1. Scheme of the proposed models for FSHD1 and FSHD2 pathogenesis**

914 Tandemly arrayed D4Z4 repeats (triangles) and the 4q35 haplotype elements are  
915 represented along with the molecular signatures proposed for FSHD1 and FSHD2  
916 pathogenesis.

917

### 918 **Figure 2. Stratification and variability of D4Z4-I elements**

919 (A) D4Z4-I elements in hg38 and T2T. Cumulative size per chromosome of D4Z4-I elements.  
920 Only chromosomes for which at least 1 Kb of D4Z4-I sequence was identified, in any of the  
921 2 assemblies, are reported. Size (in Kb) is shown on the Y axis. Different colors are used  
922 for T2T and hg38 and to mark complete D4Z4-I (see legend). (B) Cumulative size (in Kb) of  
923 D4Z4-I elements in the hg38, T2T and PGR haplotype level assemblies. Left: cumulative  
924 size of D4Z4-I elements. Right: cumulative size of full D4Z4-I elements. Data is displayed in

925 the form of a barplot. Values are on the Y axis, labels on the X axis. For the human  
926 pangenome haplotype level assemblies, 3 distinct bars are used to indicate the minimum,  
927 maximum and average values. Color codes according to the legend. (C) Dendrogram of  
928 complete D4Z4-l elements. Red rectangles and color codes are used to delineate the 5 main  
929 groups of D4Z4-l elements, as identified by sequence similarity-based clustering. (D) Total  
930 estimated number of complete D4Z4 elements per sequence similarity group. Distributions  
931 of values are displayed in the form of a boxplot, with groups indicated on the X axis and  
932 copy numbers on the Y axis. The top-right panel provides zoom on groups chr 14, chr 15-  
933 21, chr 22-1 and chr 22-2.

934

### 935 **Figure 3. Characterization of D4Z4 alleles**

936 (A) Heatmap of *ter-DUX4*. Scaled identity levels are displayed by the green color gradient  
937 on the right. The dendrogram on the left shows clustering of *ter-DUX4* based on sequence  
938 identity. Colored vertical bars are used to indicate: presence/absence of pLam; classification  
939 as qA or qB; sequence similarity cluster (see top). Color codes are explained directly under  
940 each bar. (B) Numerosity of sequence similarity clusters. The barplot shows (y-axis) the  
941 total number of *ter-DUX4* in each cluster (x-axis). (C) Boxplot of substitution rates.  
942 Substitution rates (substitutions by 100 bp) by cluster. Distribution of values are shown as  
943 a boxplot. Clusters are on the y-axis, values on the x-axis. (D) Distance of qA and qB  
944 elements from *ter-DUX4*. Data are represented in the form of a histogram. Distances (in Kb)  
945 are indicated on the x-axis. qA and qB elements are marked with different colors (see  
946 legend). (E-G) Annotation of terminal D4Z4 repeats. Two barplots are displayed for the 3  
947 (out of 4) clusters to which 5 or more sequences have been assigned. Each barplot reports,  
948 for qA and qB alleles respectively: the total count (tot); the number pLam-like elements  
949 (pLam); the number pLam-like elements with a valid PAS (plamPolyA); the total number of  
950 haplotypes with 8 or less D4Z4 repeats. Values are indicated on the y-axis, labels on the x-

951 axis. Distinct sequence similarity clusters are indicated by a corresponding label directly  
952 under each plot. (G-H) Total number of complete D4Z4-I elements in H) qA and qB  
953 haplotypes; I) haplotypes with (pLam+) and without (pLam-). Distribution of values are  
954 displayed in the form of a boxplot, with values on the X-axis and groups on the Y axis. Color  
955 codes are consistent throughout Figure 2.

956

#### 957 **Figure 4. CpG Methylation profiles of cohort subjects inferred on T2T**

958 A total of 82 CpGs for which complete data are available for all the study subjects are shown.  
959 (A) Heatmap of % CpG methylation: each row represents the CpG methylation pattern of a  
960 single individual. Columns represent the methylation pattern of each analyzed CpG. The  
961 dendrogram shows the clustering of the subjects based on the observed methylation  
962 profiles. Colored vertical bars are used to display CCEF clinical category status, and the  
963 presence/absence of deleterious genomic variants in *SMCHD1*. Color codes are illustrated  
964 directly under each bar. The colored bar at the top demarcates each of the 4 distinct 95%  
965 sequence identity genomic region clusters with complete data for all the subjects. (B)  
966 Boxplots of methylation levels distributions by subject. The color-scale used for the heatmap  
967 and the boxplot is shown at the bottom. (C) Violin-plot of average methylation levels,  
968 restricted to CpGs in regions GS1 and GS6, in subjects with/without deleterious genetic  
969 variants in *SMCHD1*.

970

#### 971 **Figure 5. Methylation profiles of cohort subjects inferred on hg38**

972 A total of 32 distinct CpGs, for which complete data are available for all the study subjects,  
973 are displayed. (A) Heatmap of % CpG methylation: individuals are reported on the rows and  
974 CpGs on the columns. The dendrogram shows a clustering of the subjects based on the  
975 observed methylation profiles. Colored vertical bars are used to display CCEF grades, and  
976 the presence/absence of deleterious genomic variants in *SMCHD1*. Color codes are

977 illustrated directly under each bar. The colored bar at the top demarcates each of the 4  
978 distinct 95% sequence identity genomic regions clusters with complete data for all the  
979 subjects. (B) Boxplots of methylation levels distributions by subject. The color-scale used  
980 for the heatmap and the boxplot is shown at the bottom. (C) Violin-plot of average  
981 methylation levels in subjects with/without deleterious genetic variants in *SMCHD1*. Only  
982 CpGs in primer-targeted regions are considered.

983

#### 984 **Figure 6. Genotype-phenotype correlation**

985 (A) Venn diagrams reporting the number of subjects presenting different combinations of  
986 4q/10q-specific D4Z4 methylation level, *SMCHD1* mutational status and FSHD clinical  
987 category. (B) ACMG classification, median 4q/10q-specific D4Z4 methylation of variant  
988 carriers, variant type and location are reported for each *SMCHD1* variant. When the variant  
989 is carried by more than one subject, median D4Z4 methylation status of all the subjects is  
990 reported. (C) Distribution of 4q/10q-specific D4Z4 methylation, *SMCHD1* mutational status  
991 and FSHD clinical category in the 8 trios/parent-child couples included in the study.  
992 Circles/squares are colored according to the median 4q/10q-specific D4Z4 methylation  
993 level; the color is fading as it represents the variability of CpG methylation pattern in each  
994 individual. WT= subject carrying no *SMCHD1* variants, VAR= subject carrying a damaging  
995 *SMCHD1* variants.

996

997

998

999

1000

1001



1002 **Table titles and legends**

1003

1004 **Table 1. Titration analysis for the identification of the optimal sequence similarity**  
1005 **threshold**

| Identity-level (%) | # regions | size (Kb) | uniquely mapped<br>BSC reads (%) | # testable<br>CpGs |
|--------------------|-----------|-----------|----------------------------------|--------------------|
| 99                 | 145       | 67,41     | 5,43%                            | 237                |
| 98                 | 103       | 59,13     | 12,13%                           | 411                |
| 97                 | 87        | 54,01     | 26,74%                           | 873                |
| 96                 | 73        | 46,14     | 32,47%                           | 997                |
| 95                 | 60        | 40,03     | 49,17%                           | 1176               |
| 94                 | 56        | 38,71     | 51,01%                           | 1083               |
| 93                 | 53        | 37,55     | 53,43%                           | 891                |
| 92                 | 46        | 36,49     | 58,47%                           | 766                |
| 91                 | 45        | 33,02     | 72,71%                           | 637                |
| 90                 | 42        | 32,75     | 75,41%                           | 451                |

1006 Identity-level (%): sequence identity threshold. #regions: number of distinct regions defined  
1007 by the threshold. size (Kb): total size of the regions in Kb. uniquely mapped BSC reads (%):  
1008 percentage of uniquely mapping BSC reads. # testable CpGs: total number of distinct CpGs  
1009 for which more than 10 reads were available for more than 25 subjects. Italic characters  
1010 indicate the selected sequence similarity threshold.

1011

1012

1013

1014

1015

1016



1017 **Table 2. Characterization of complete D4Z4 elements clusters**

| Cluster | Chromosome     | % sequences | Median number of complete repeats (per haplotype) | Average substitution rate per 100 bp | Substitution rates estimates at haplotype level |
|---------|----------------|-------------|---------------------------------------------------|--------------------------------------|-------------------------------------------------|
| 1       | Chr 10         | 87%         | 19                                                | 0.13                                 | 0.015-0.21                                      |
| 2       | Chr 4          |             | 22                                                | 0.245                                | 0.164-0.4312                                    |
| 3       | Chr 14         | 2.3%        | 0.5                                               | 1.73                                 | NA                                              |
| 4       | Chr 15, Chr 21 | 3.1%        | 1                                                 | 1.81                                 | NA                                              |
| 5       | Chr 22-1       | 1.5%+6.1%   | 0                                                 | 0.798                                | NA                                              |
| 6       | Chr 22-2       |             | 2                                                 | 1.24                                 | NA                                              |

1018

1019

1020

1021

1022

1023

1024

1025

1026

1027

1028

1029

1030

| Table 3- Comparison between PGR analysis results and previous knowledge |                                                                                                                                                                                                                                                                                                                                     |
|-------------------------------------------------------------------------|-------------------------------------------------------------------------------------------------------------------------------------------------------------------------------------------------------------------------------------------------------------------------------------------------------------------------------------|
| Haplotype                                                               | Previous knowledge                                                                                                                                                                                                                                                                                                                  |
| <p>4qA</p>                                                              | <p>- 6 to 89 RU alleles;</p> <p>- The majority of alleles classified as qA are associated with a pLam both on 4q and 10q;</p> <p>- AUUAAA PAS at 4q;</p> <p>- 4.6% individuals carry a 4qA-PAS alleles with &lt;8RU;</p> <p>- qA sequence is not always at the same distance from the last D4Z4 repeat (from 4.7 Kb to 8.3 Kb).</p> |
| <p>4qB</p>                                                              | <p>- qB alleles do not carry a pLam sequence;</p> <p>- qB sequence is more proximal than qA (2.5 Kb and 7.3 Kb respectively);</p> <p>- No differences in D4Z4 repeat numbers between 4qA and 4qB alleles.</p>                                                                                                                       |
| <p>10qA</p> <p>10qB</p>                                                 | <p>- AUCAAA PAS at 10q;</p> <p>- One 10qB allele was identified.</p>                                                                                                                                                                                                                                                                |

Table 3- Comparison between PGR analysis results and previous knowledge

1032 **Table 4: GS containing CpGs covered by at least 10 BSC reads in at least 50% of**  
1033 **samples and no missing data across all samples**

| Assembly | Group | Chromosome     | N° CpGs |
|----------|-------|----------------|---------|
| T2T      | GS1   | Chr 4, Chr 10  | 28      |
|          | GS2   |                | 32      |
|          | GS5   | Chr 13, Chr 15 | 16      |
|          | GS6   |                | 5       |
| hg38     | GS3   | Chr 4, Chr 10  | 26      |

1034

# FSHD

Prevalence 1:8.000 - 1:20.000

D4Z4 repeated units (RU)

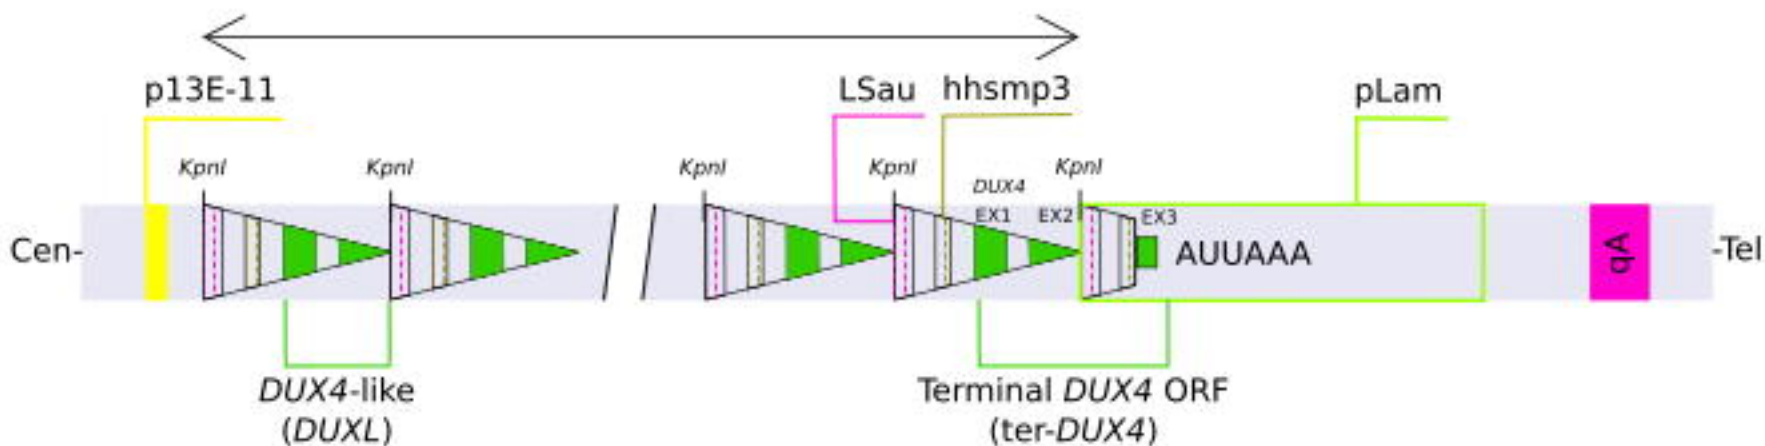

**FSHD 1**

95% cases

**FSHD 2**

5% cases

D4Z4 reduced allele (DRA)  
 $\leq 10$  RU

+  
4qA-PAS haplotype

↓  
Terminal D4Z4  
reduced methylation

↓  
Terminal DUX4 ORF (ter-DUX4) toxic expression

$> 10$  RU

+  
4qA-PAS haplotype

+  
Variants in chromatin remodeling genes  
(SMCHD1/DNMT3B/LRIF-1)

↓  
D4Z4 repeats  
reduced methylation

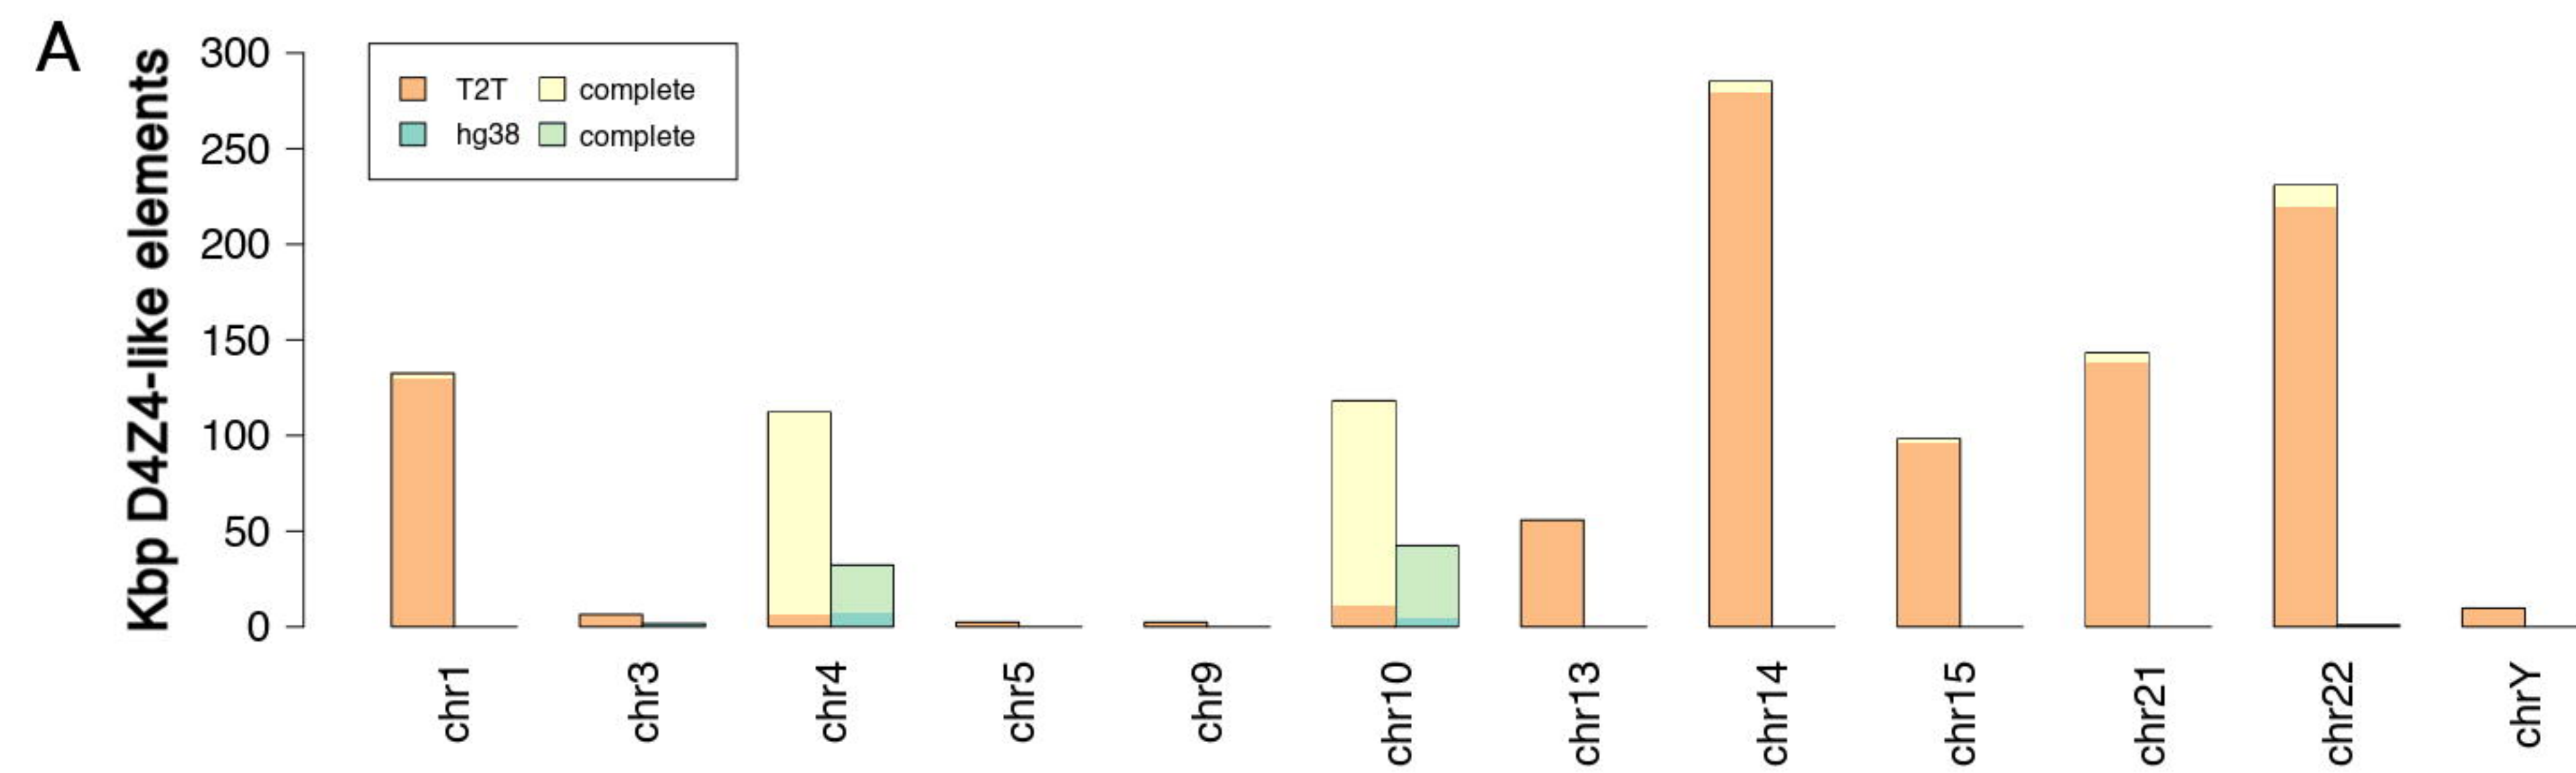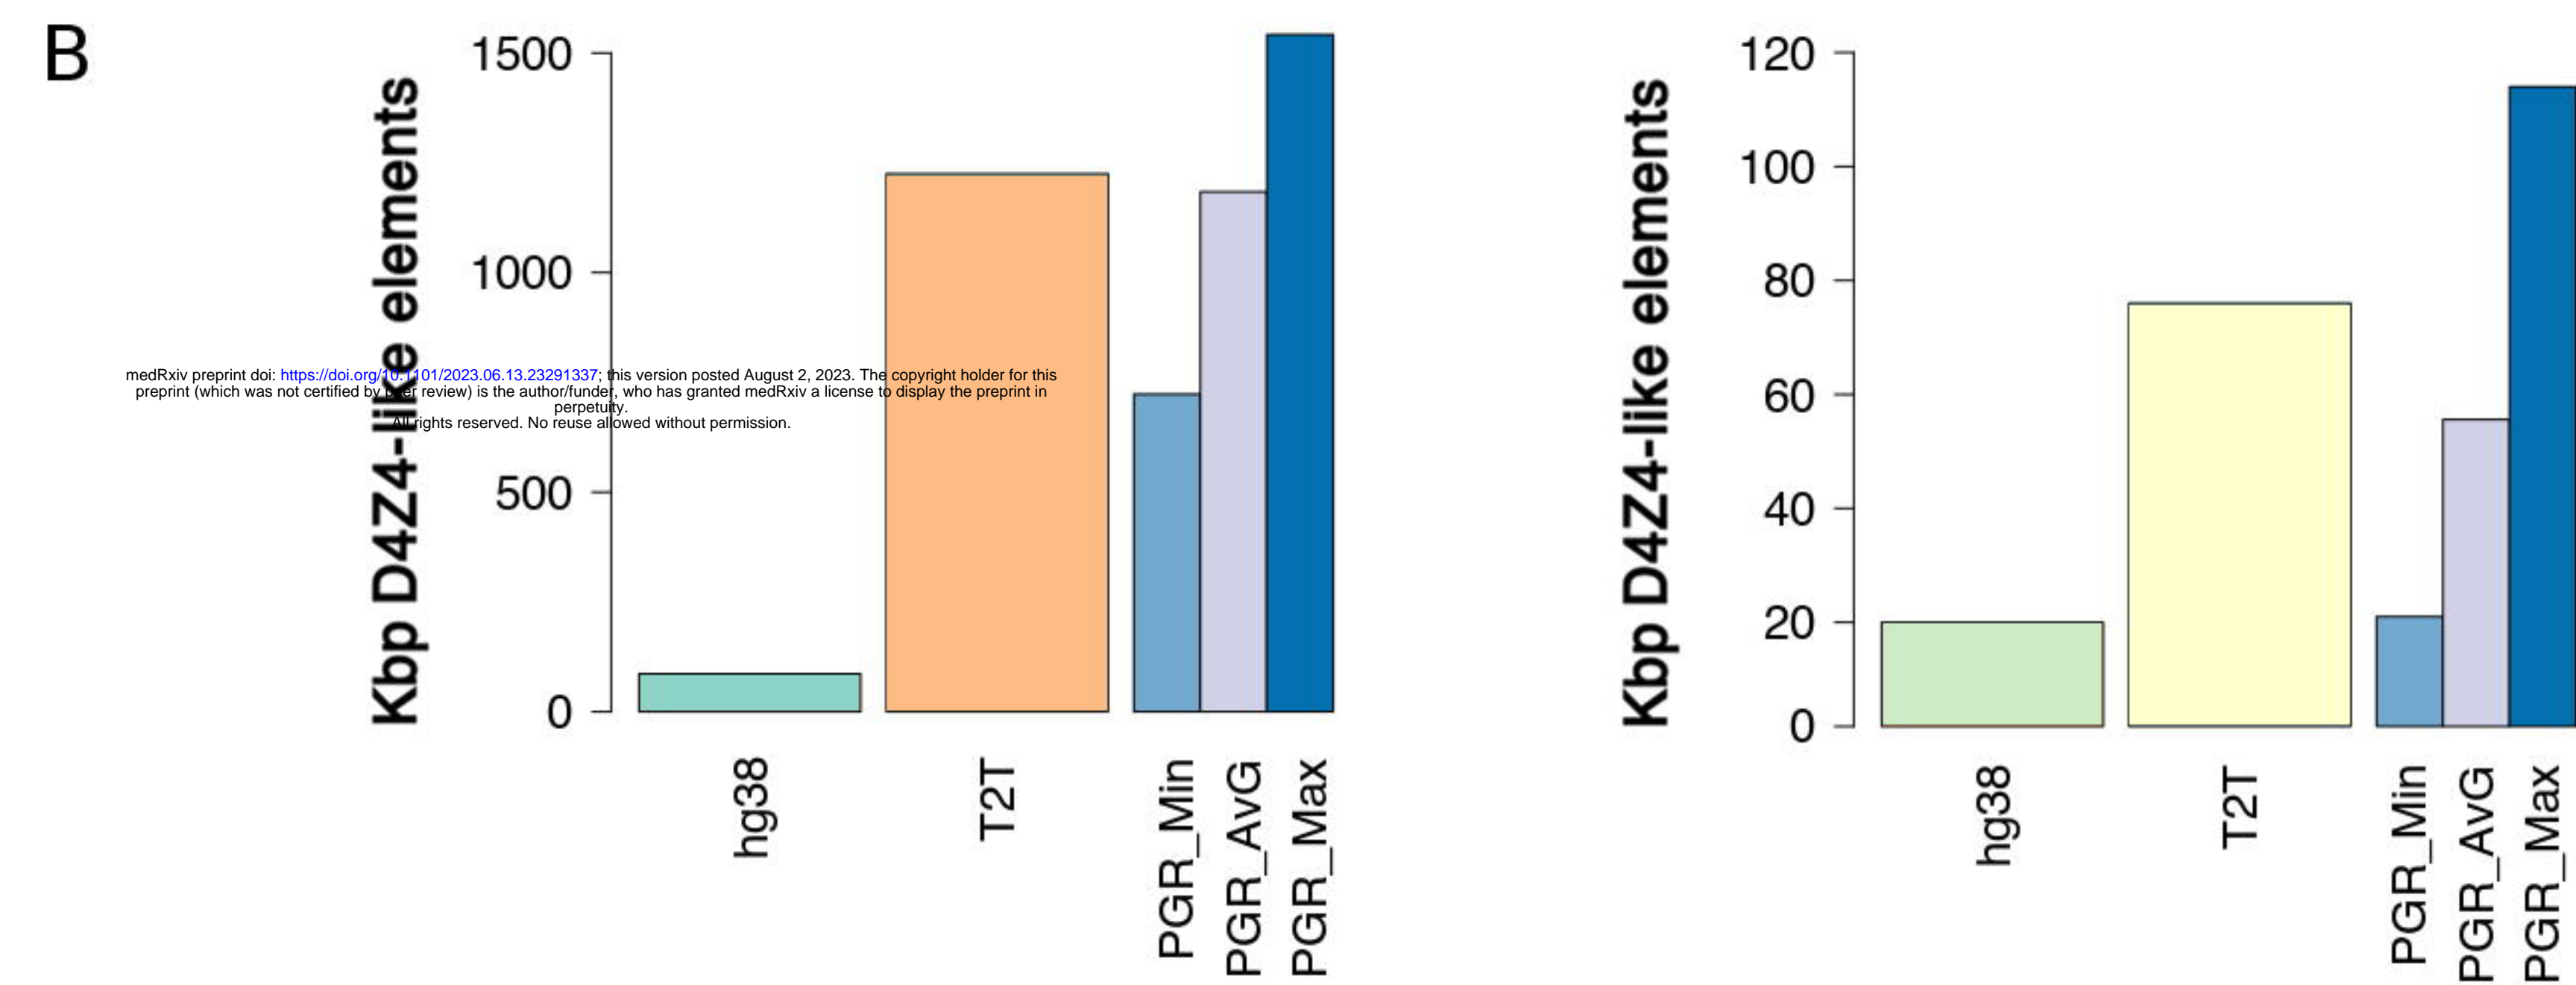

medRxiv preprint doi: <https://doi.org/10.1101/2023.06.13.23291337>; this version posted August 2, 2023. The copyright holder for this preprint (which was not certified by peer review) is the author/funder, who has granted medRxiv a license to display the preprint in perpetuity. All rights reserved. No reuse allowed without permission.

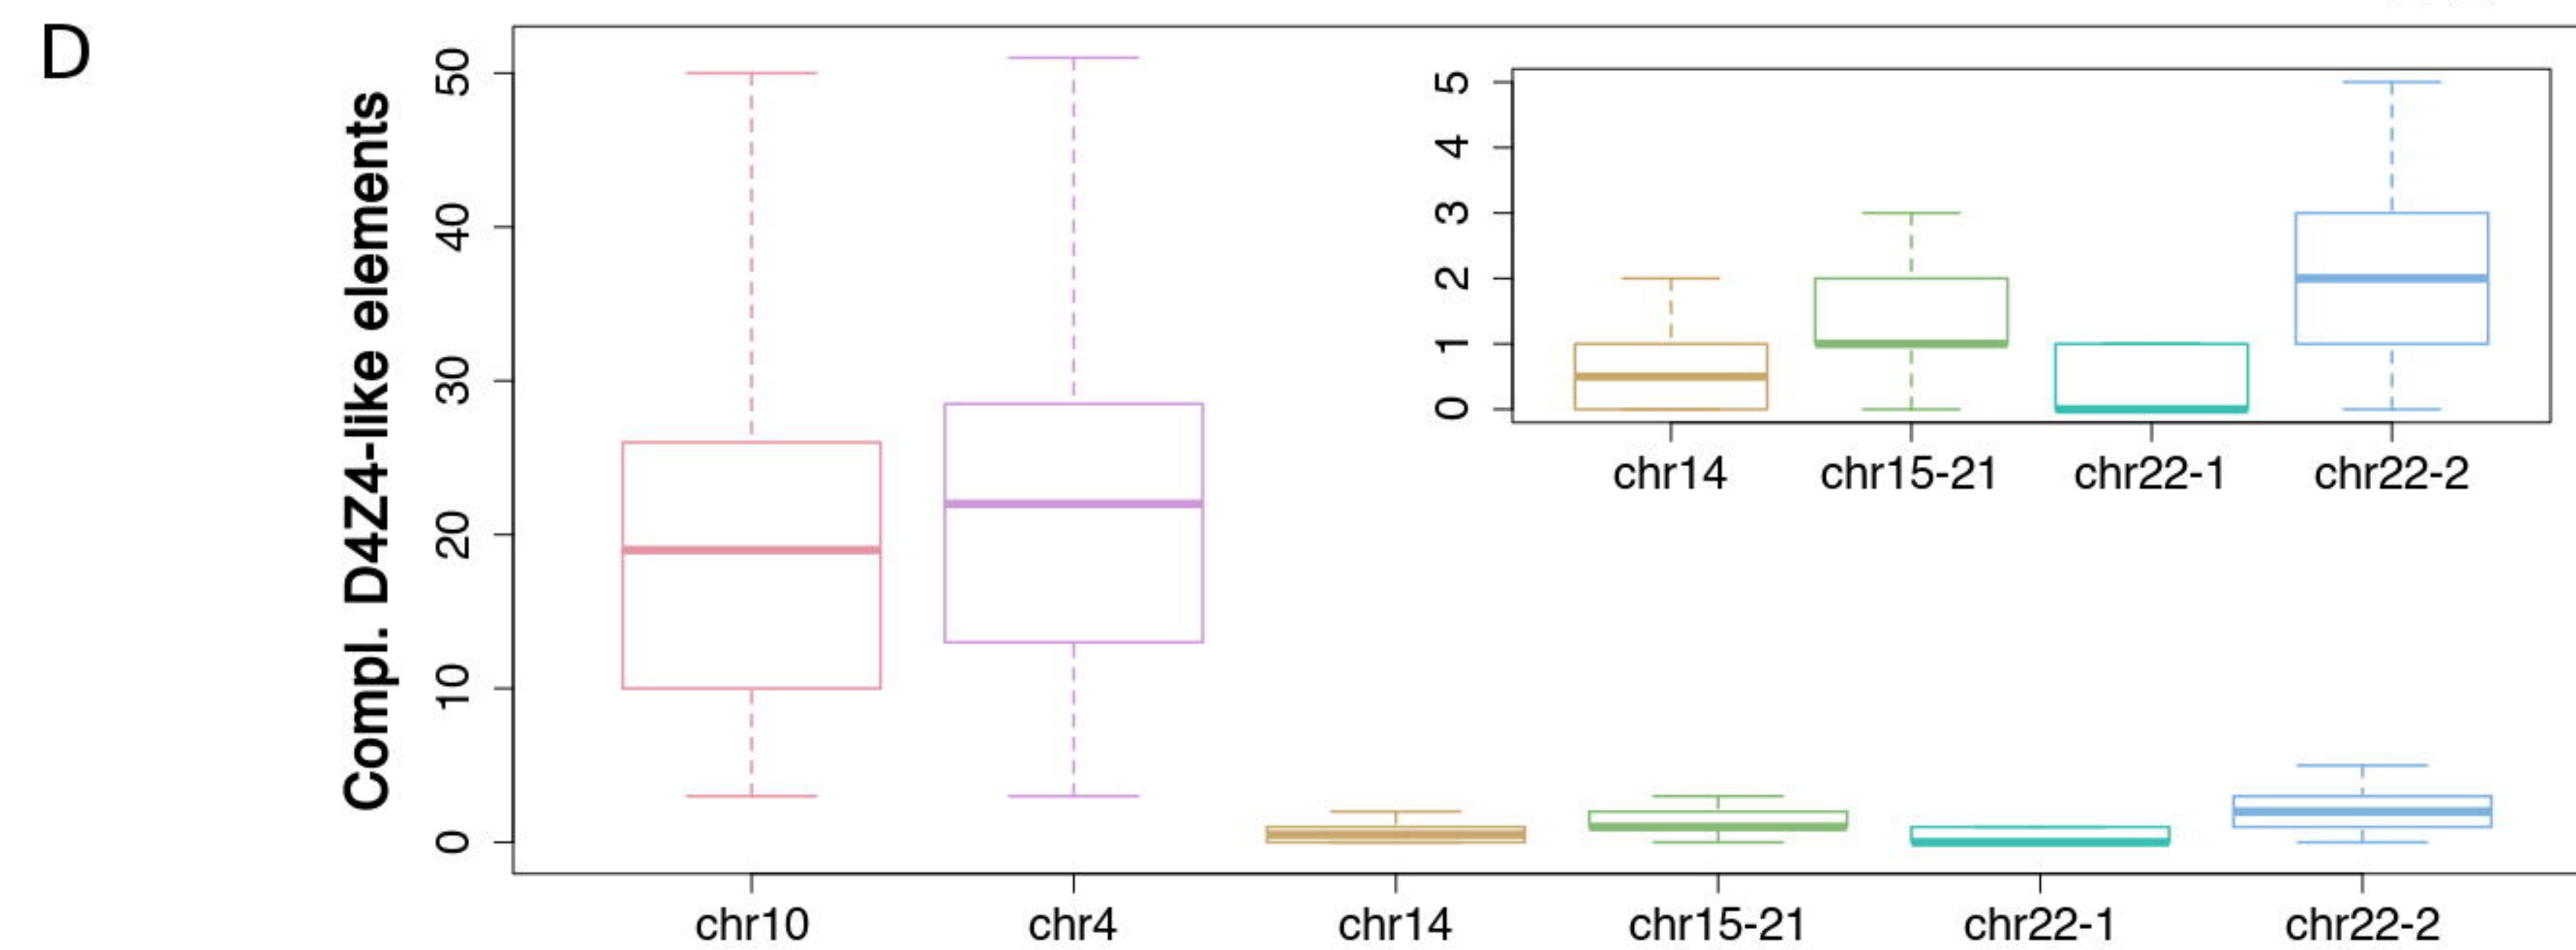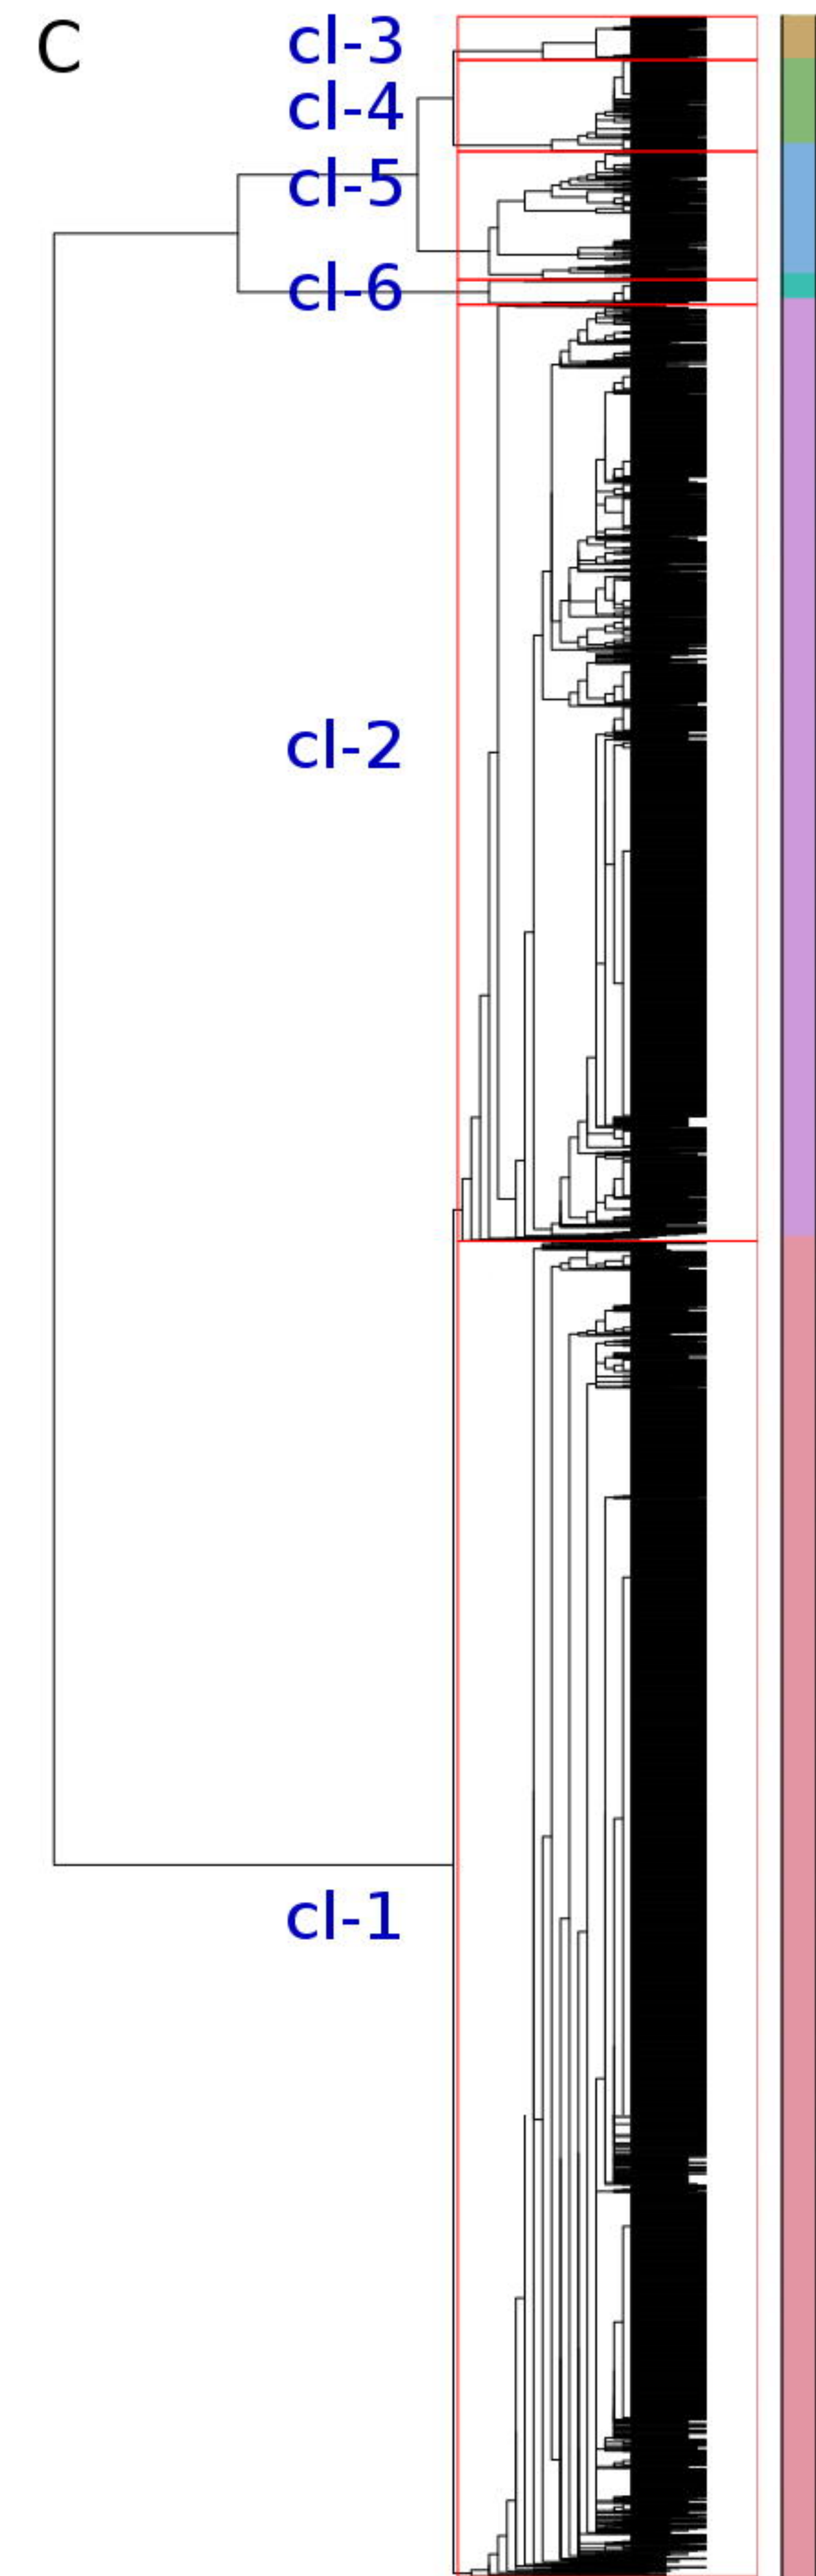



● chr10   
 ● chr4\_gr1   
 ● chr4\_gr2   
 ● chr4\_gr3   
     
 ● plam+   
 ● plam-   
     
 ● qA   
 ● qB

**A**

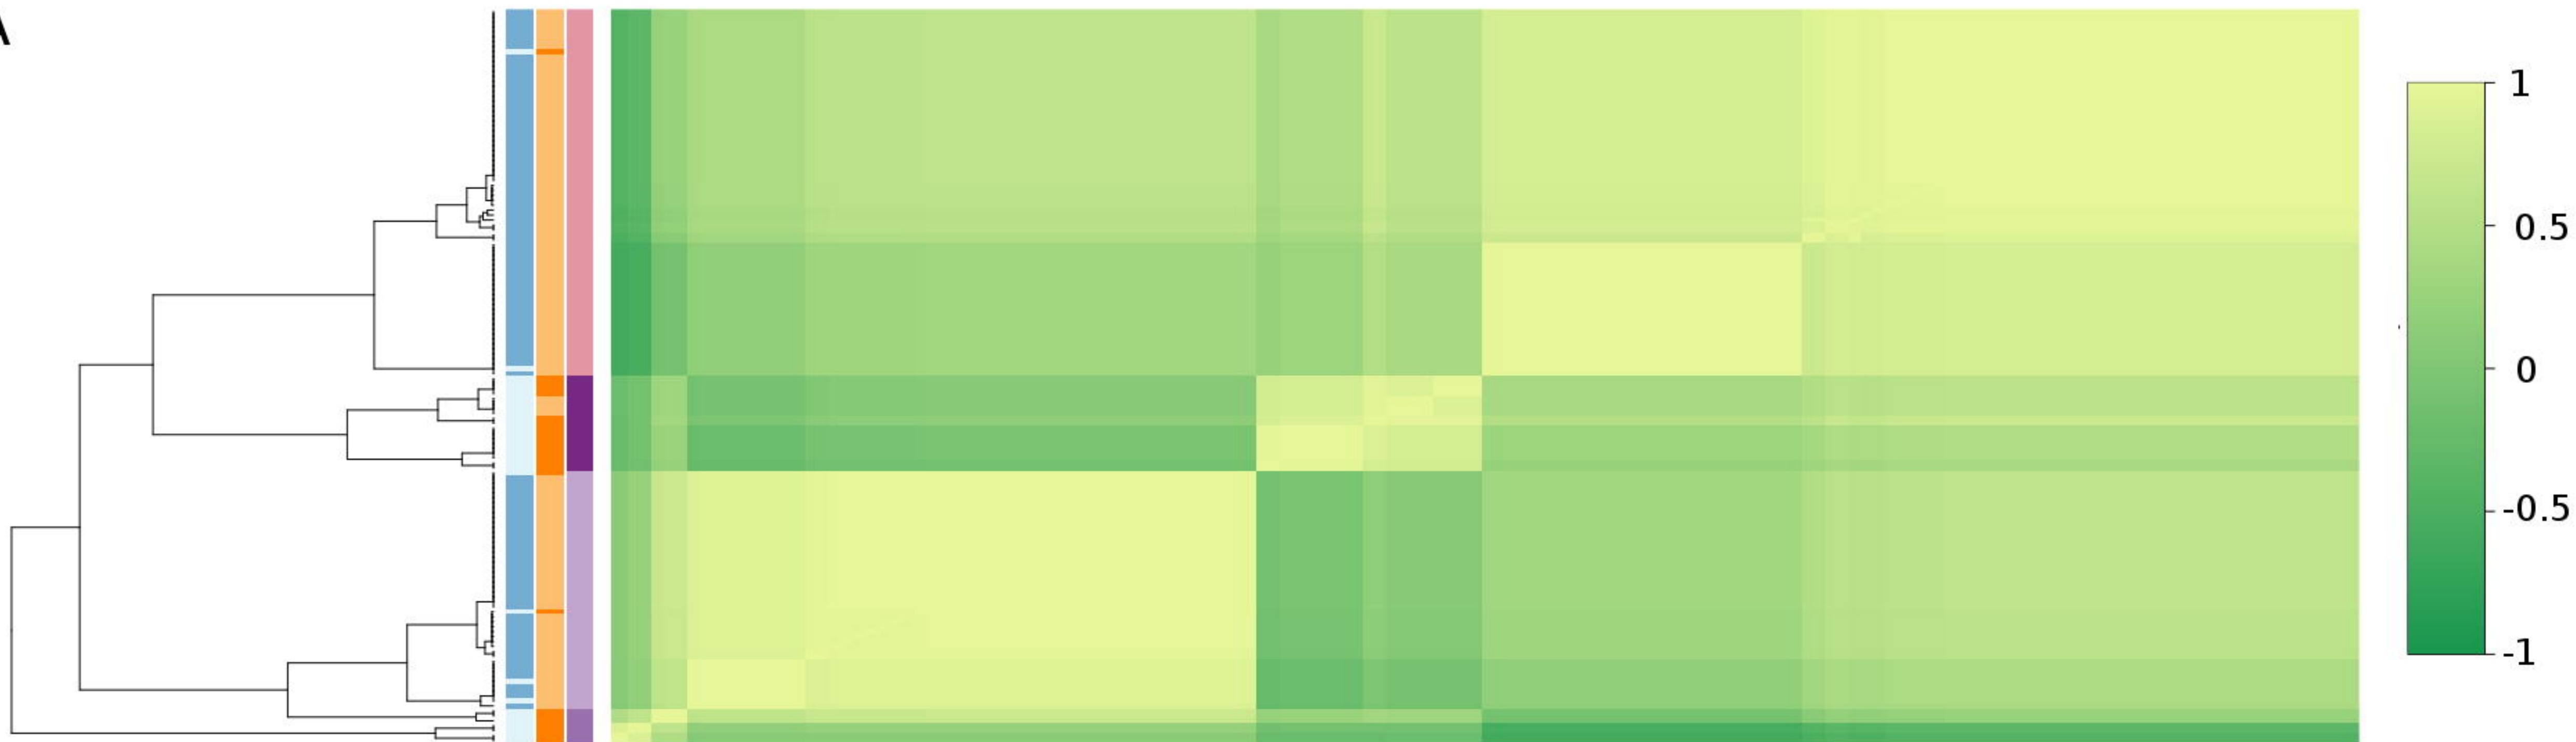

**B**

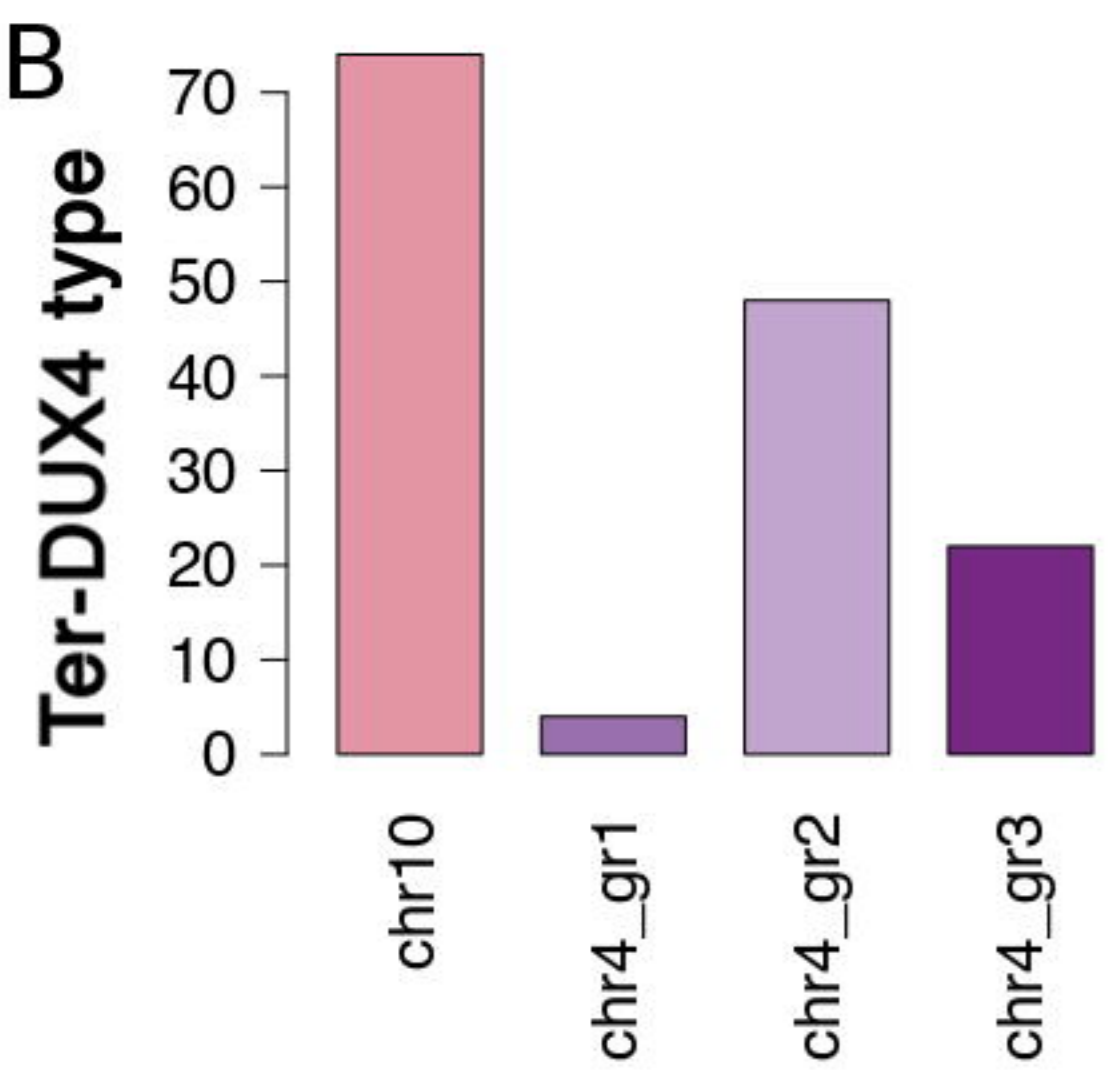

**C**

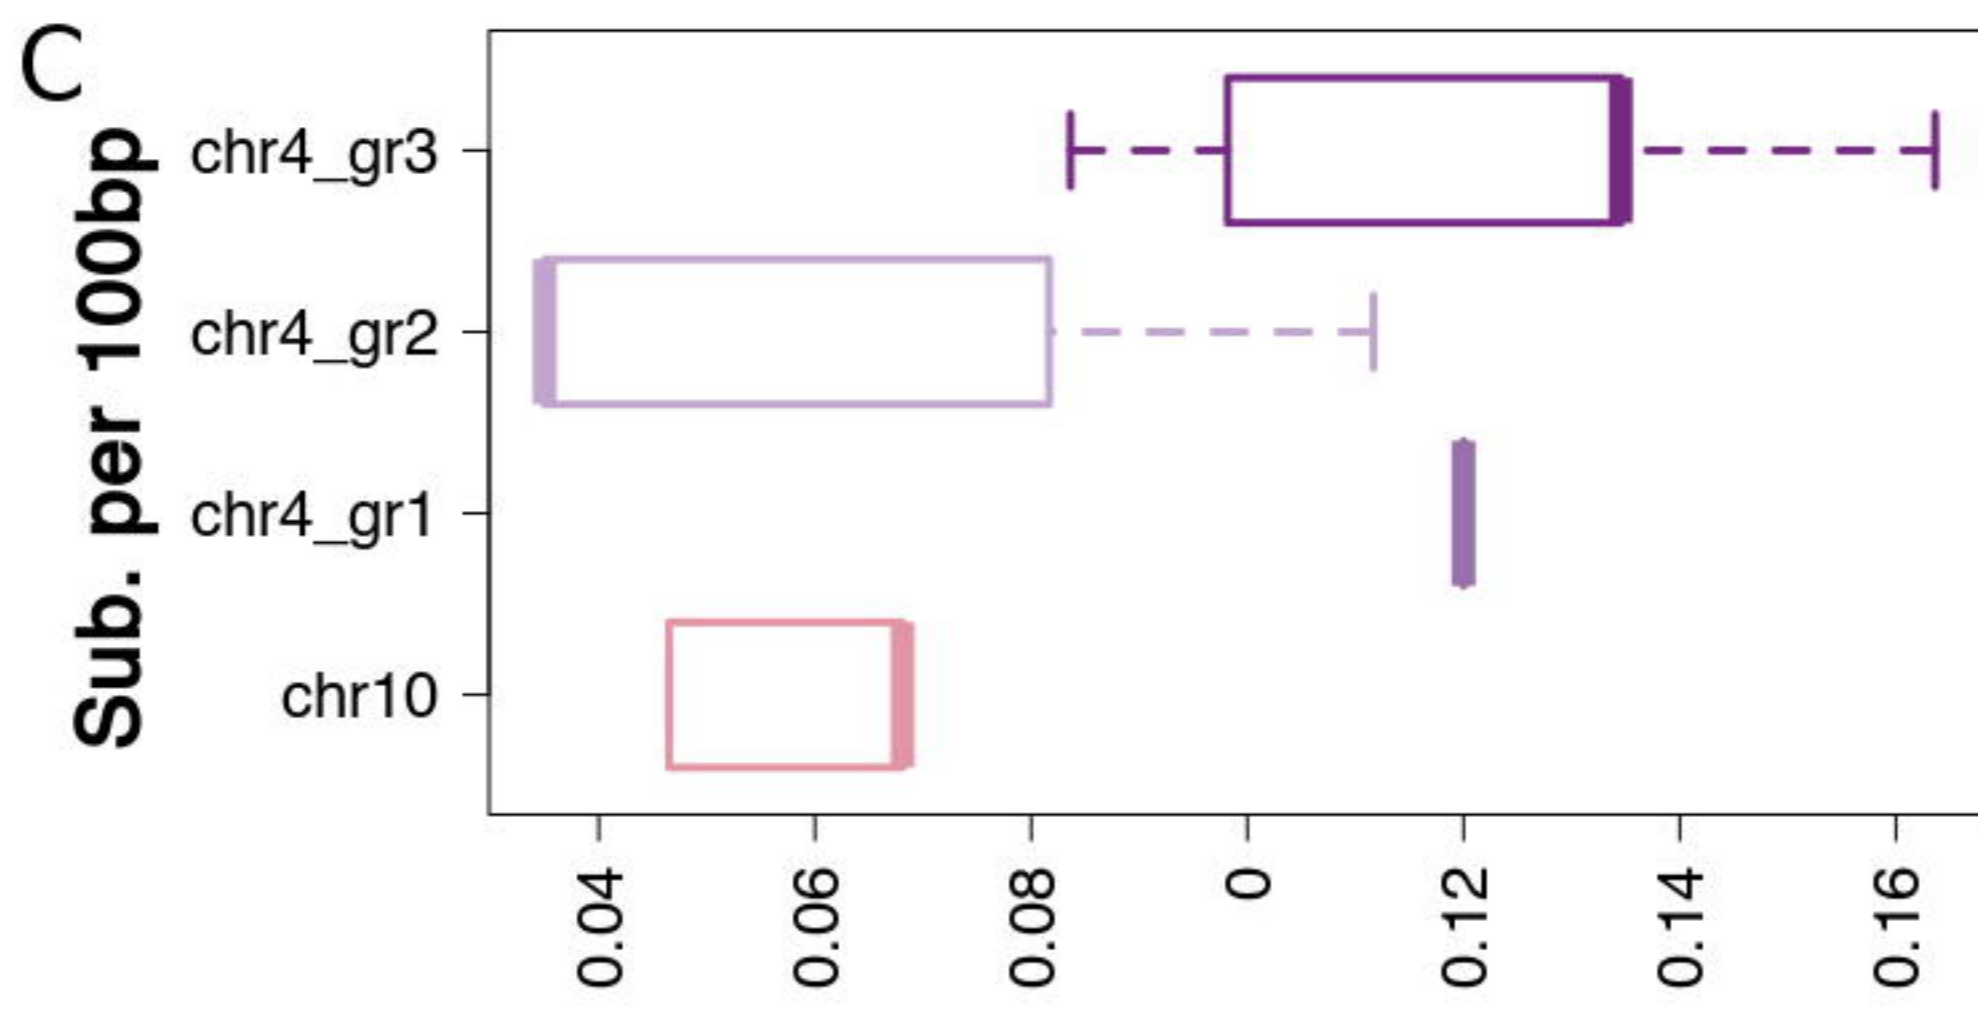

**D**

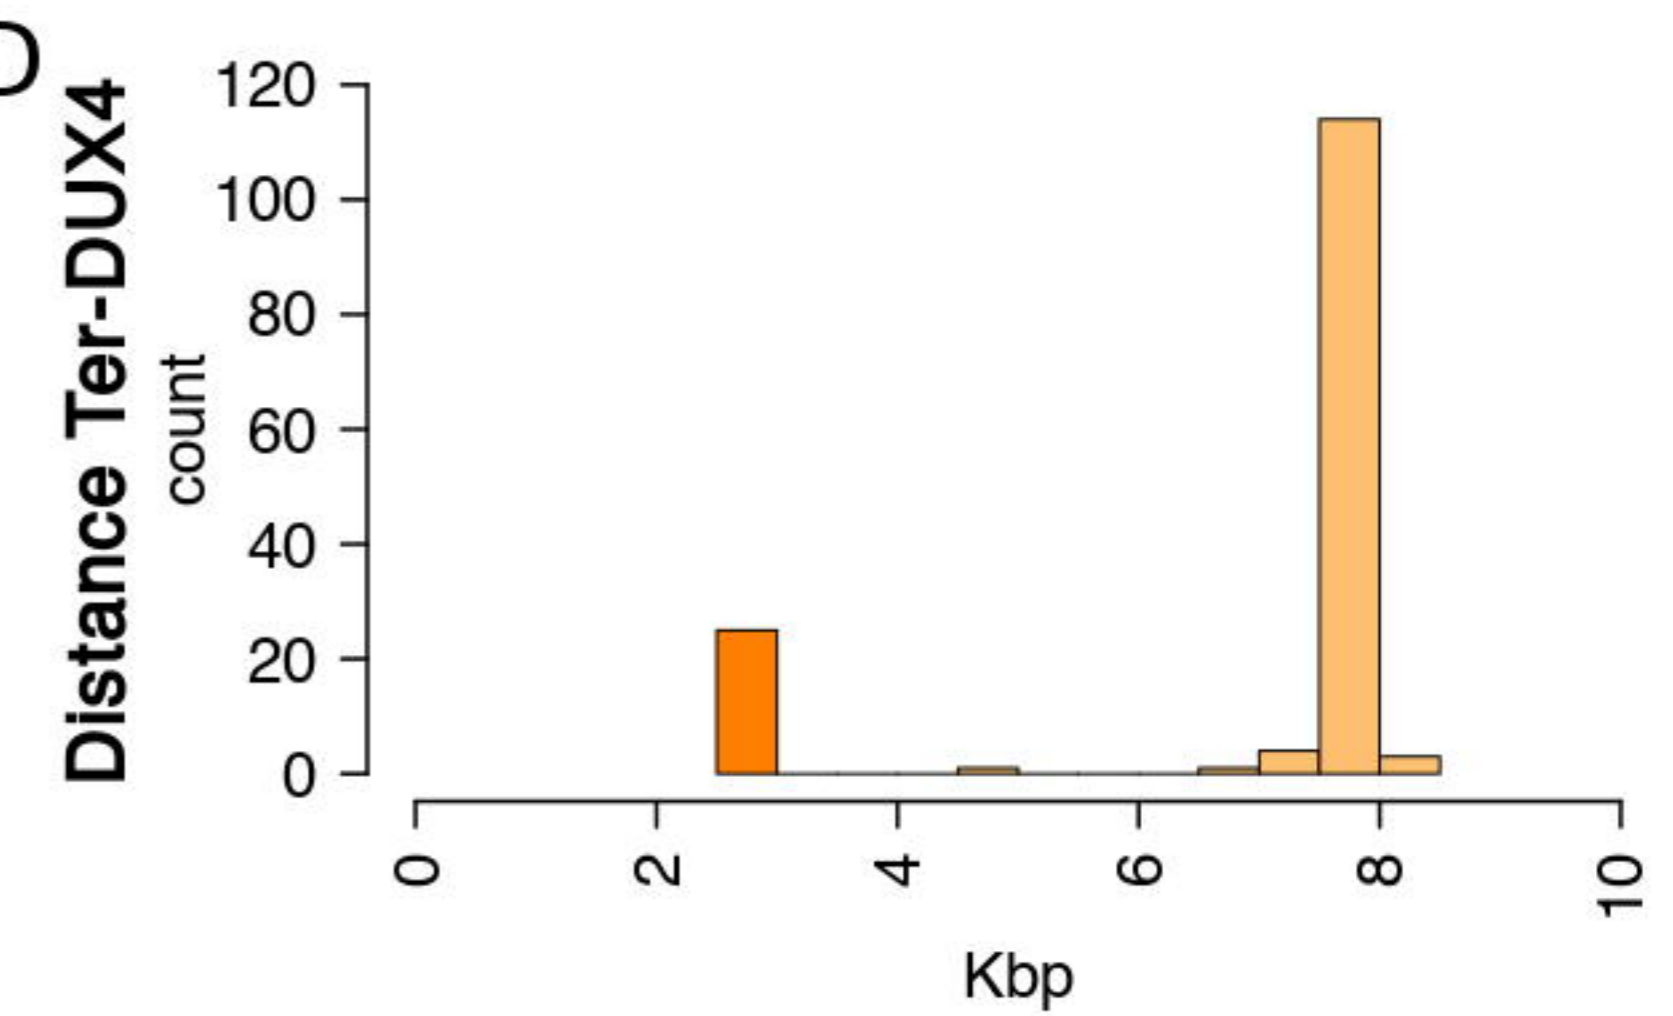

**E**

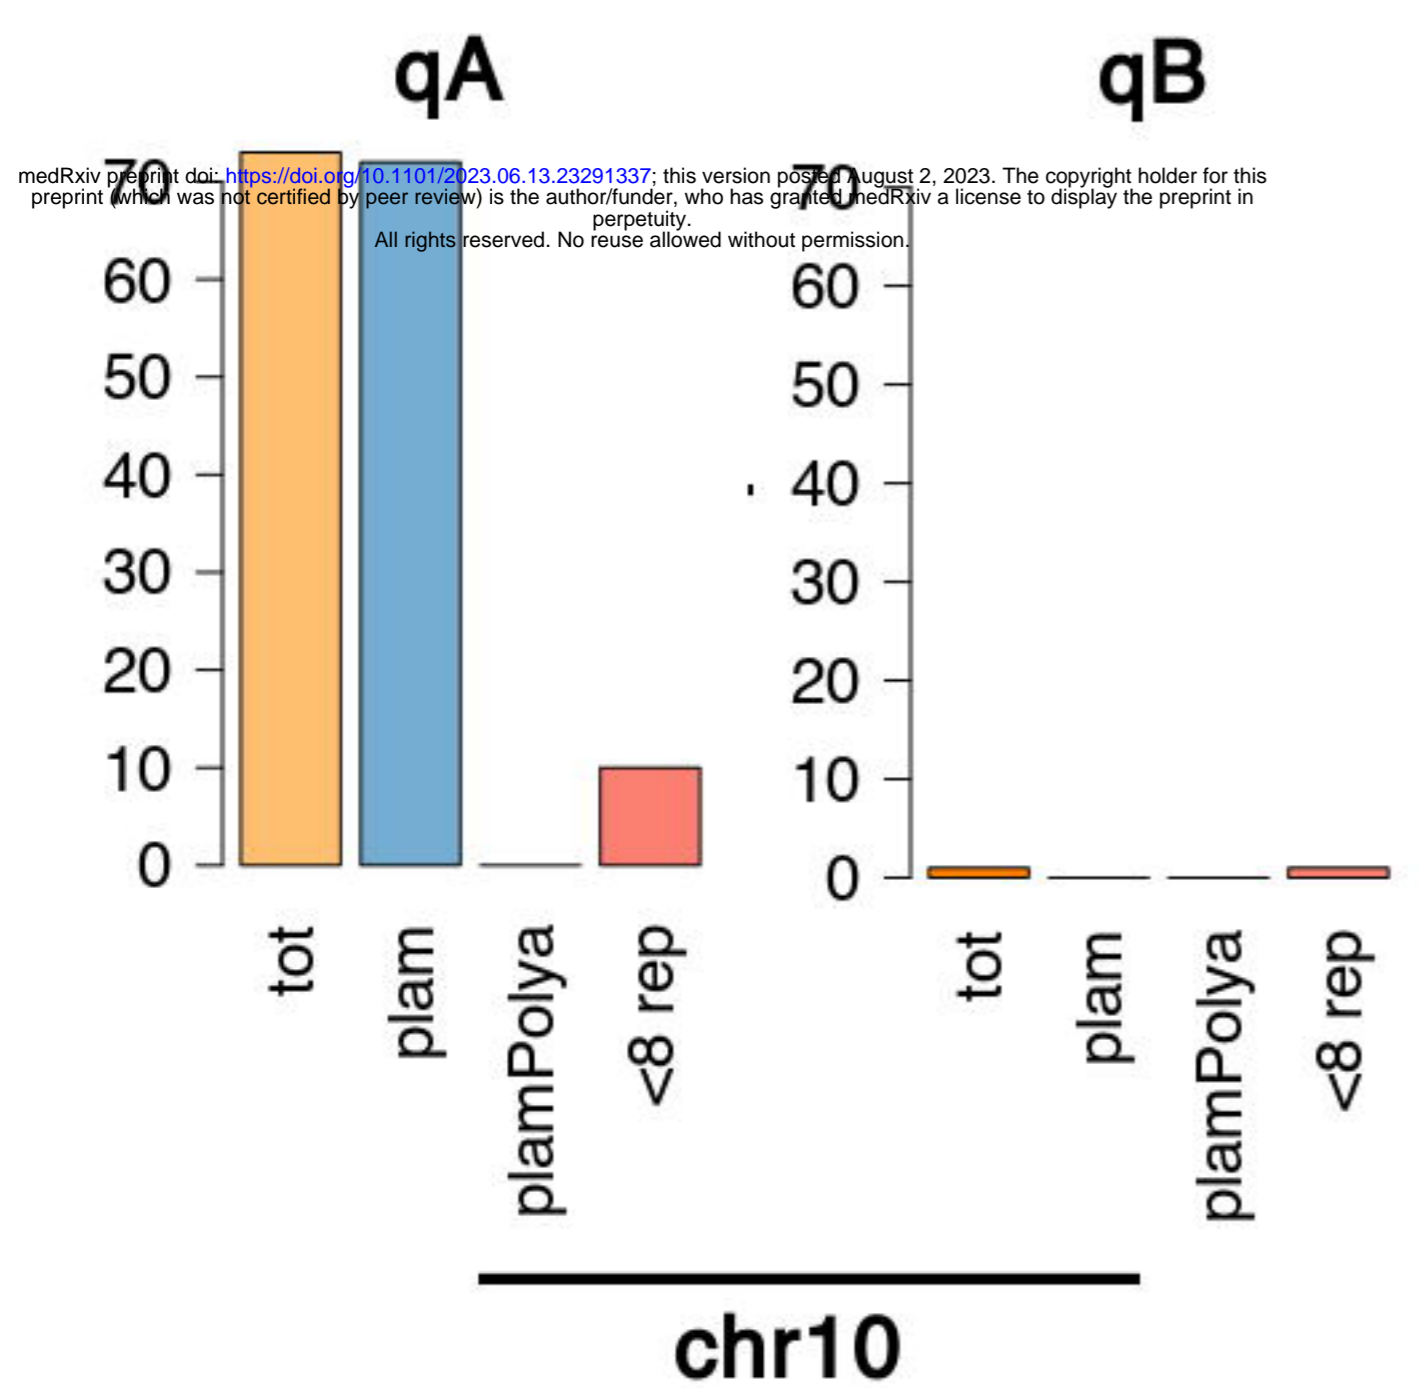

**F**

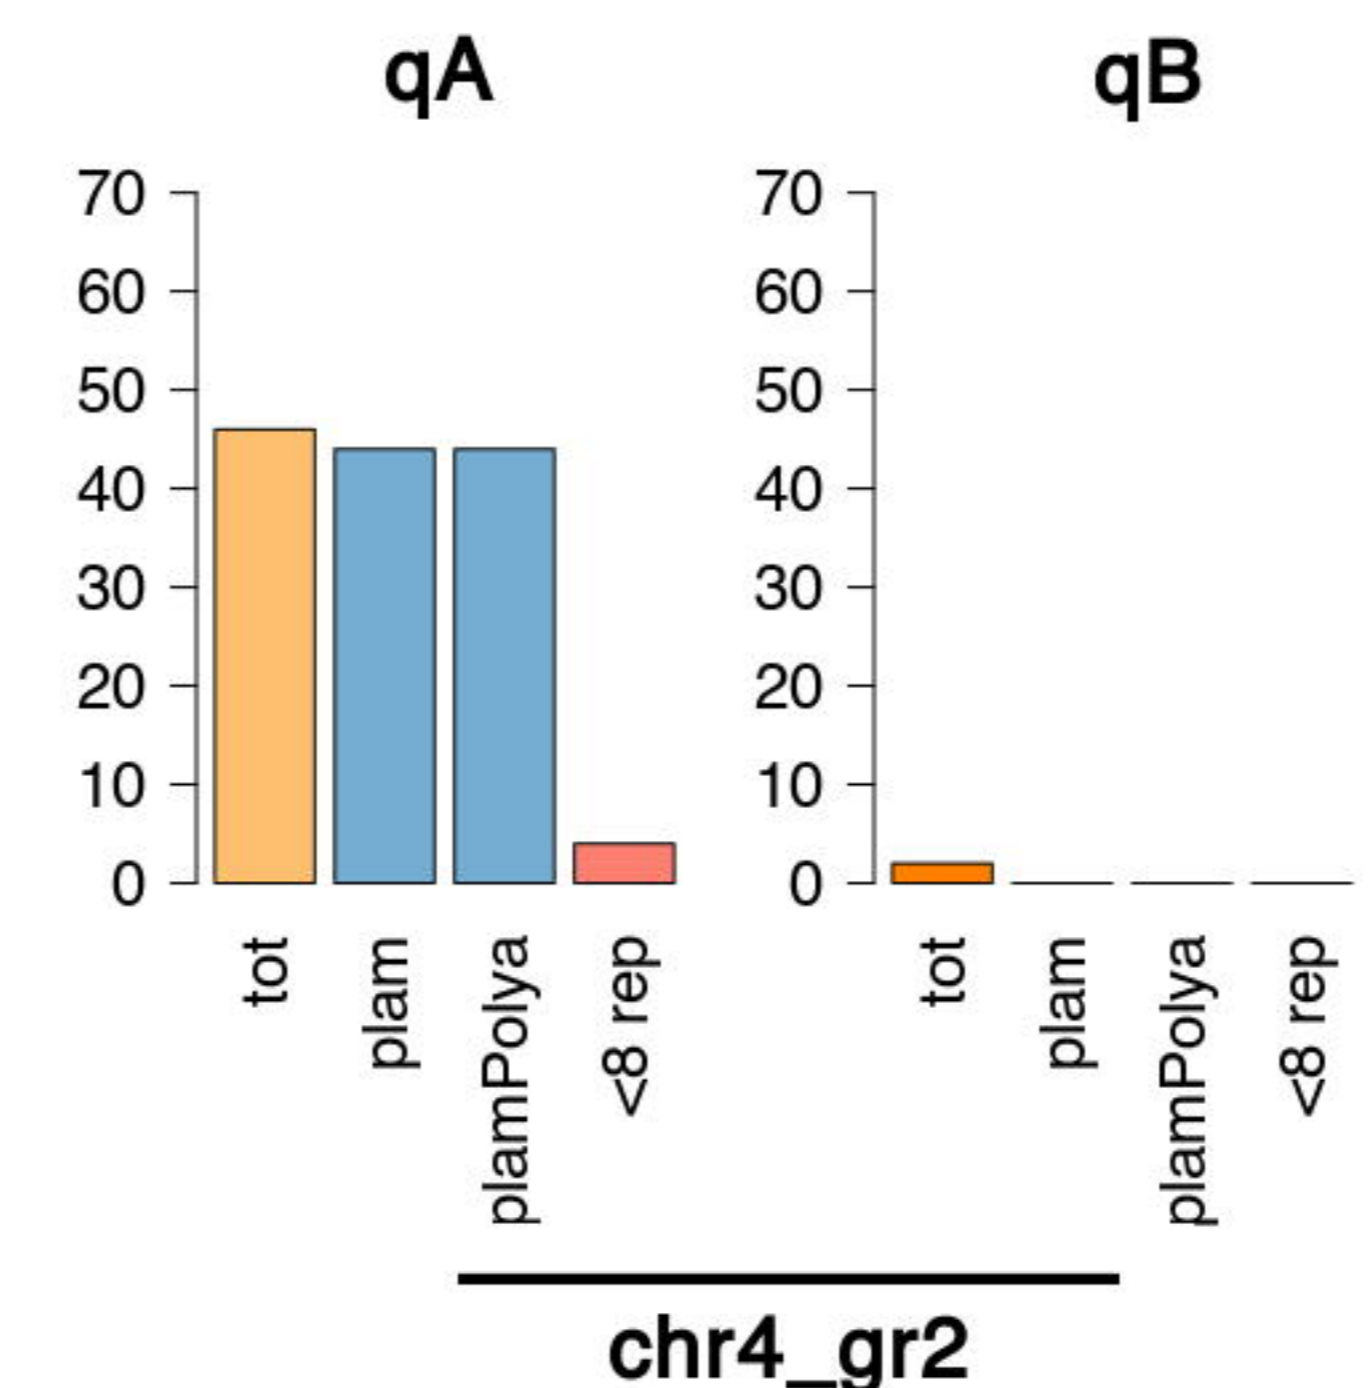

**G**

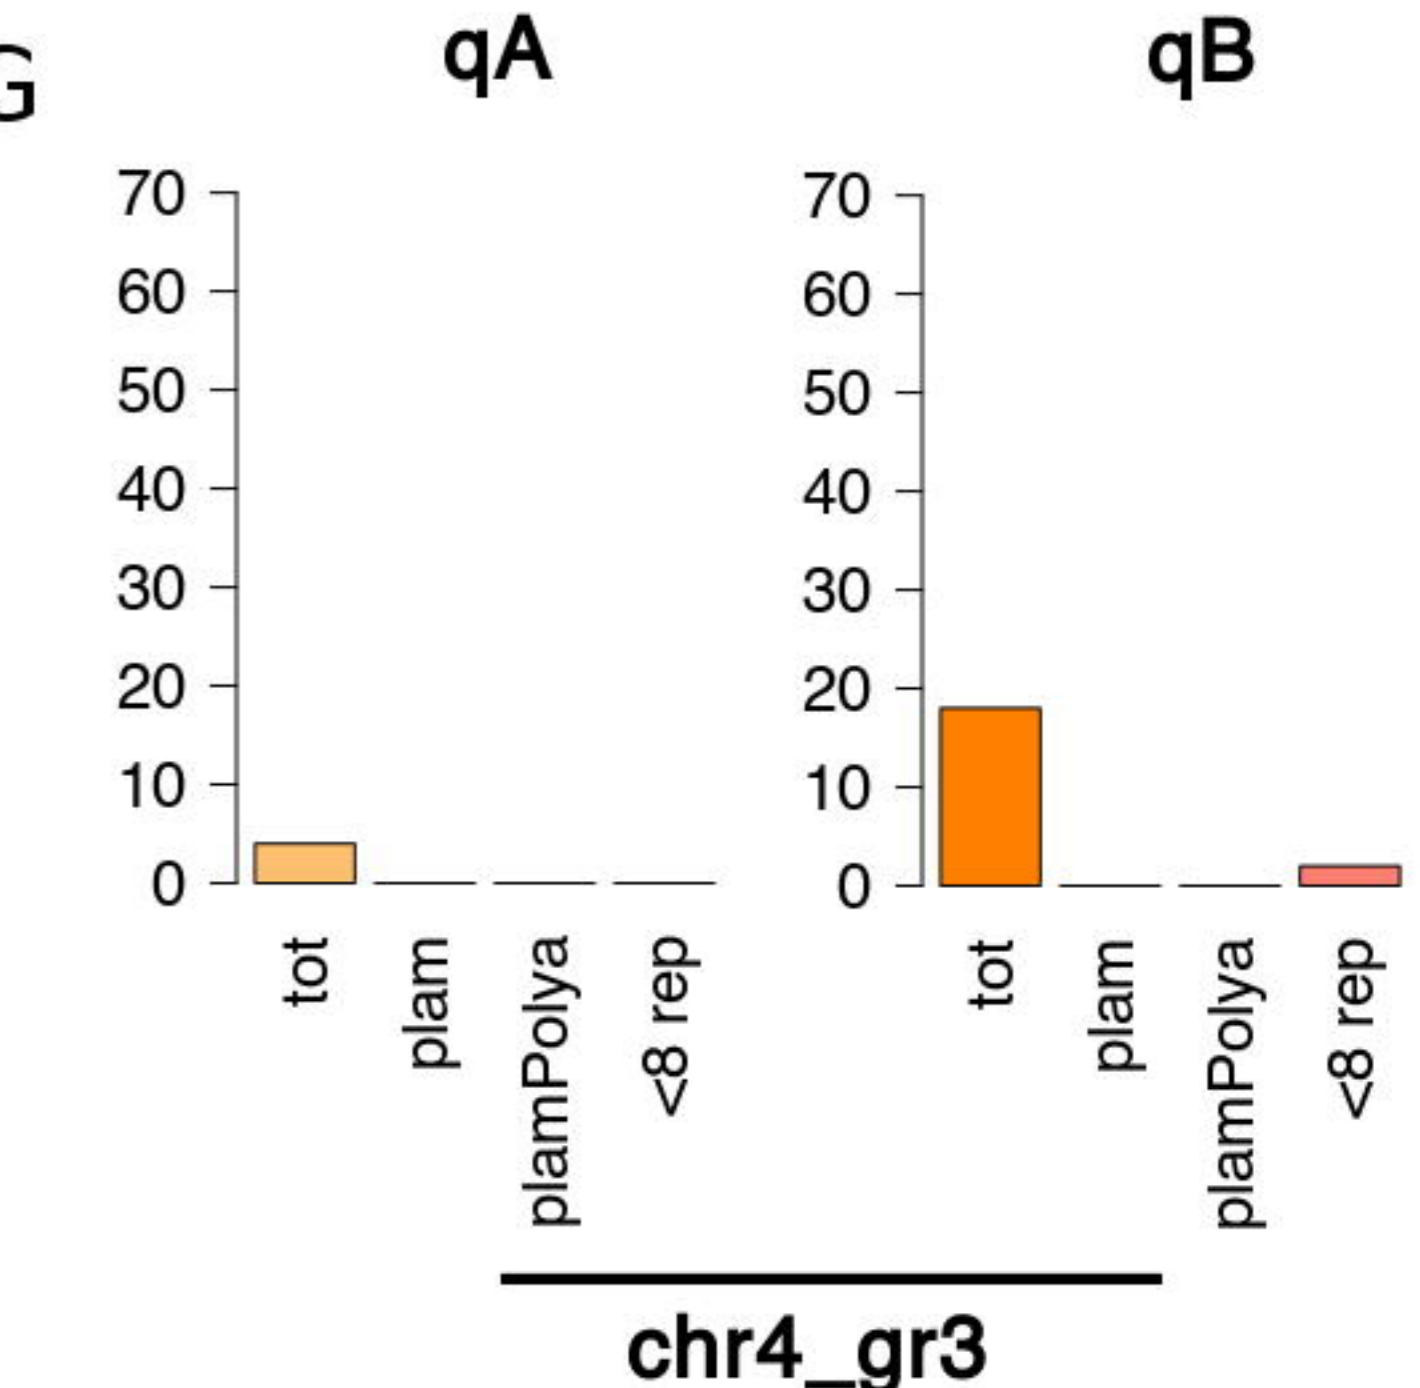

**H**

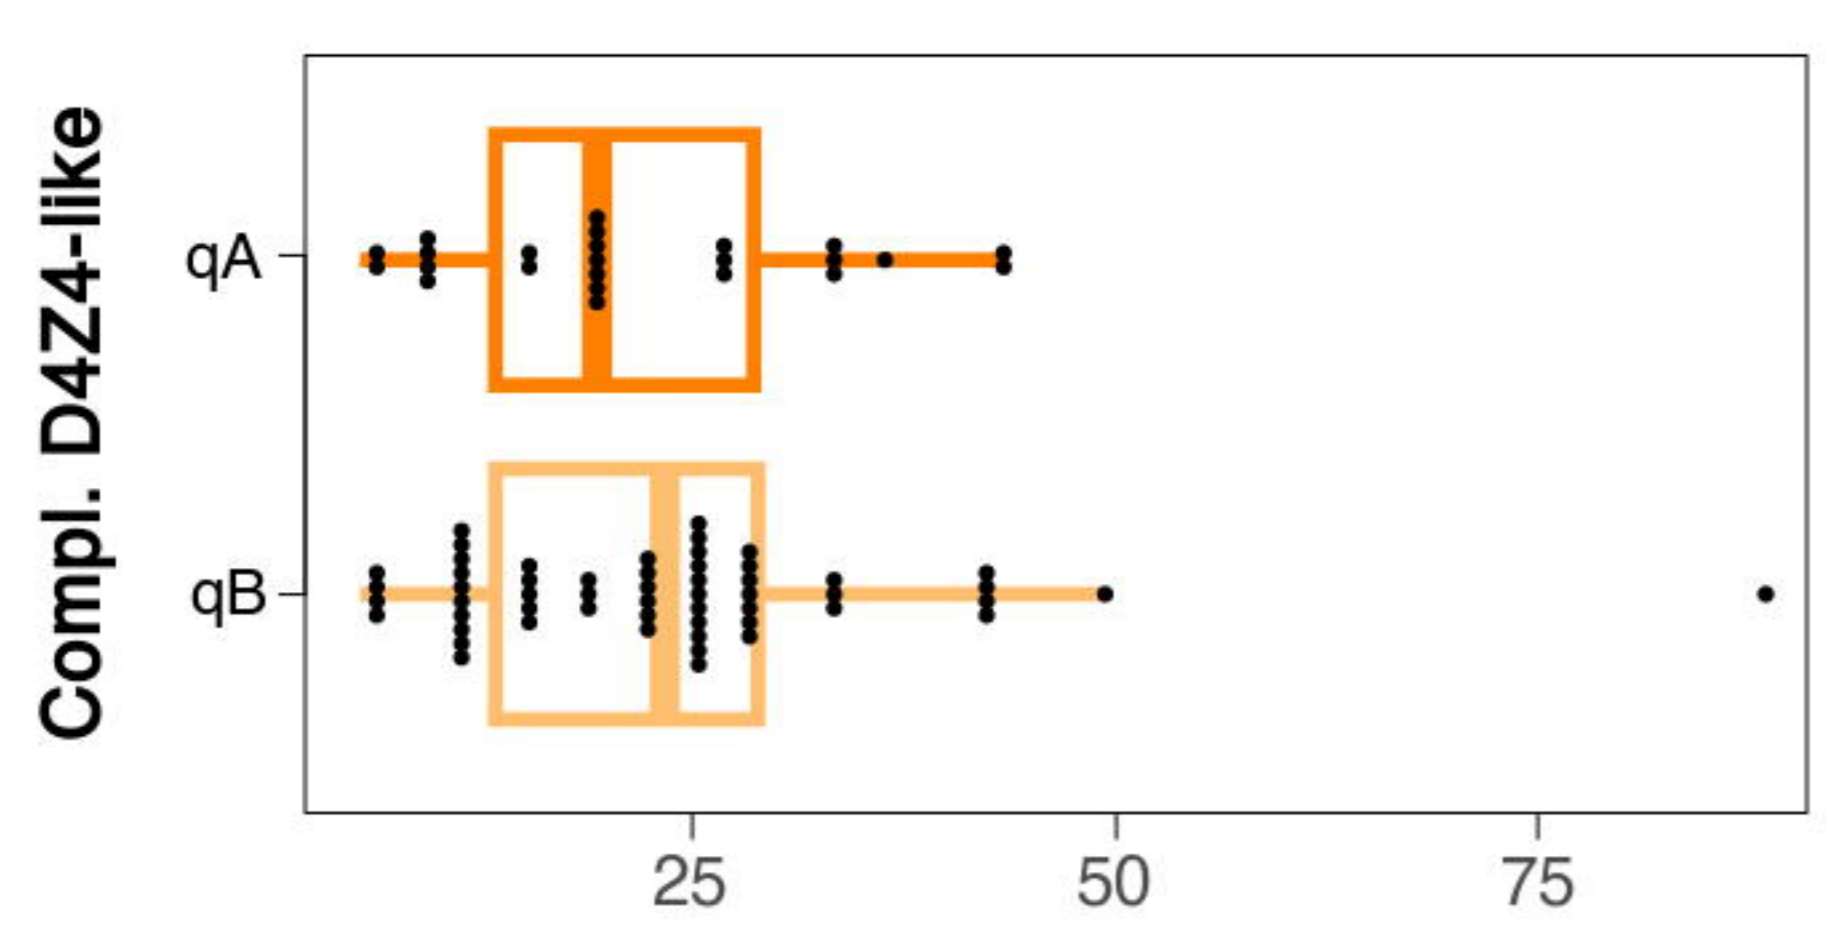

**I**

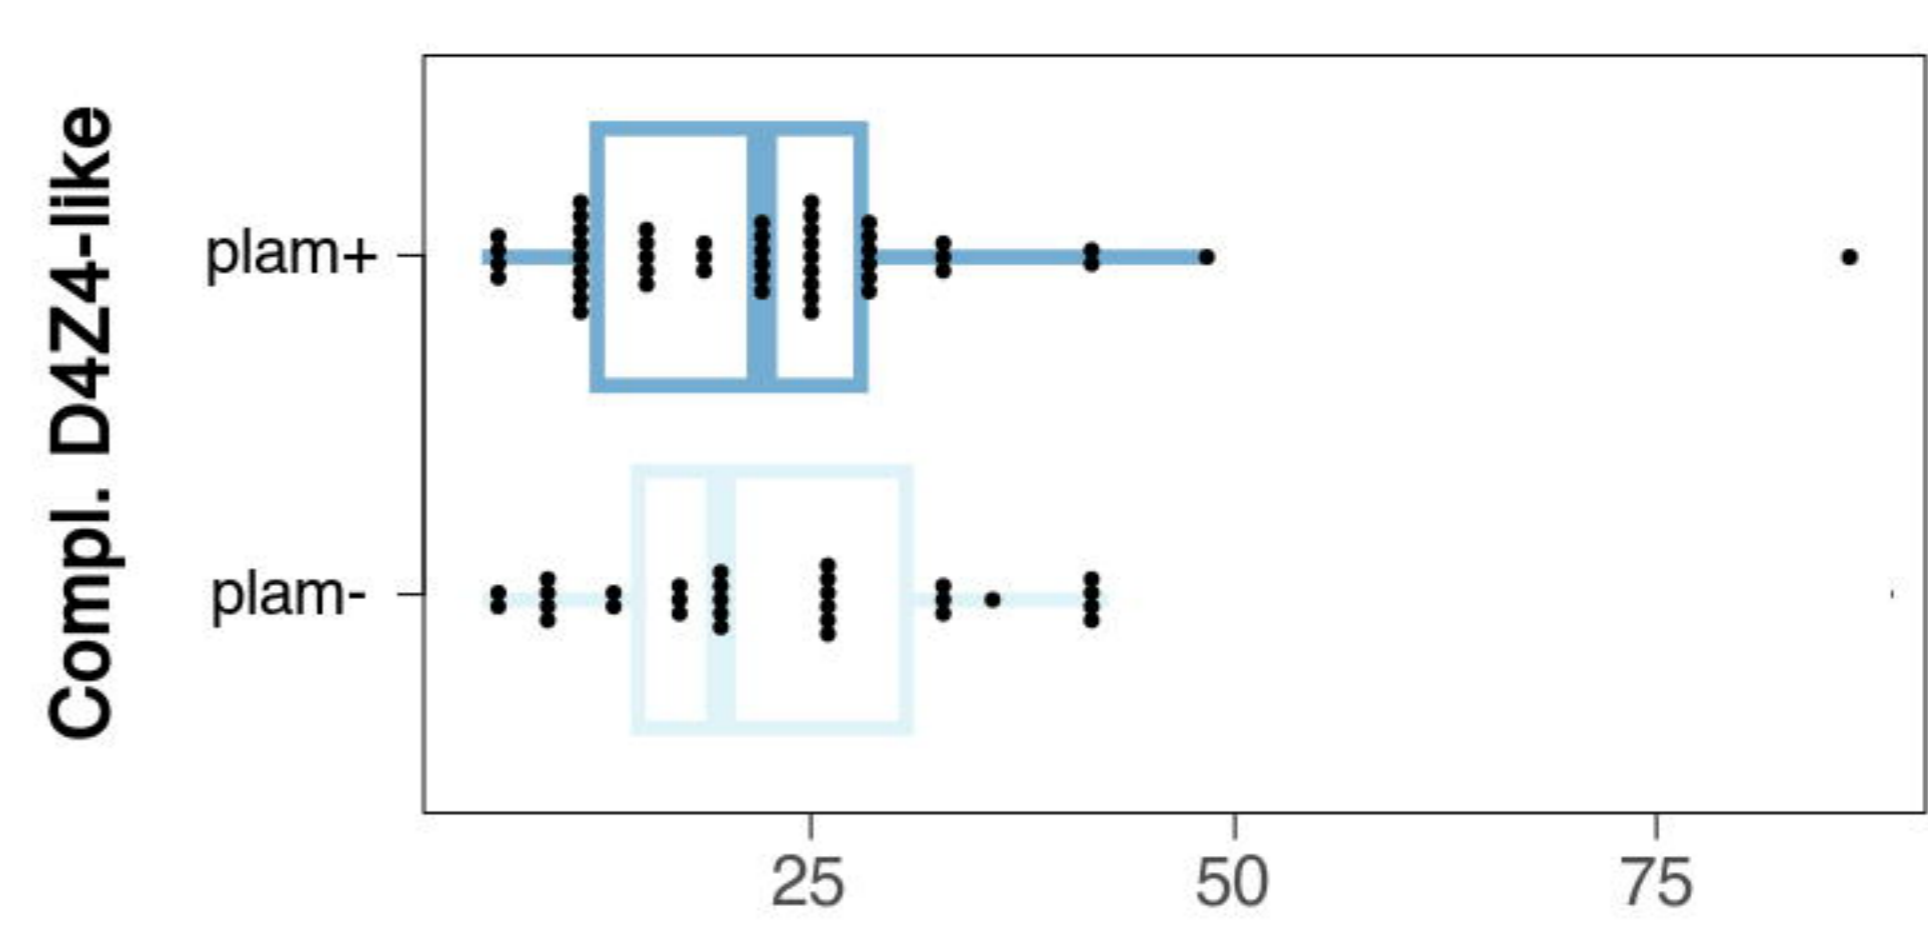



**A**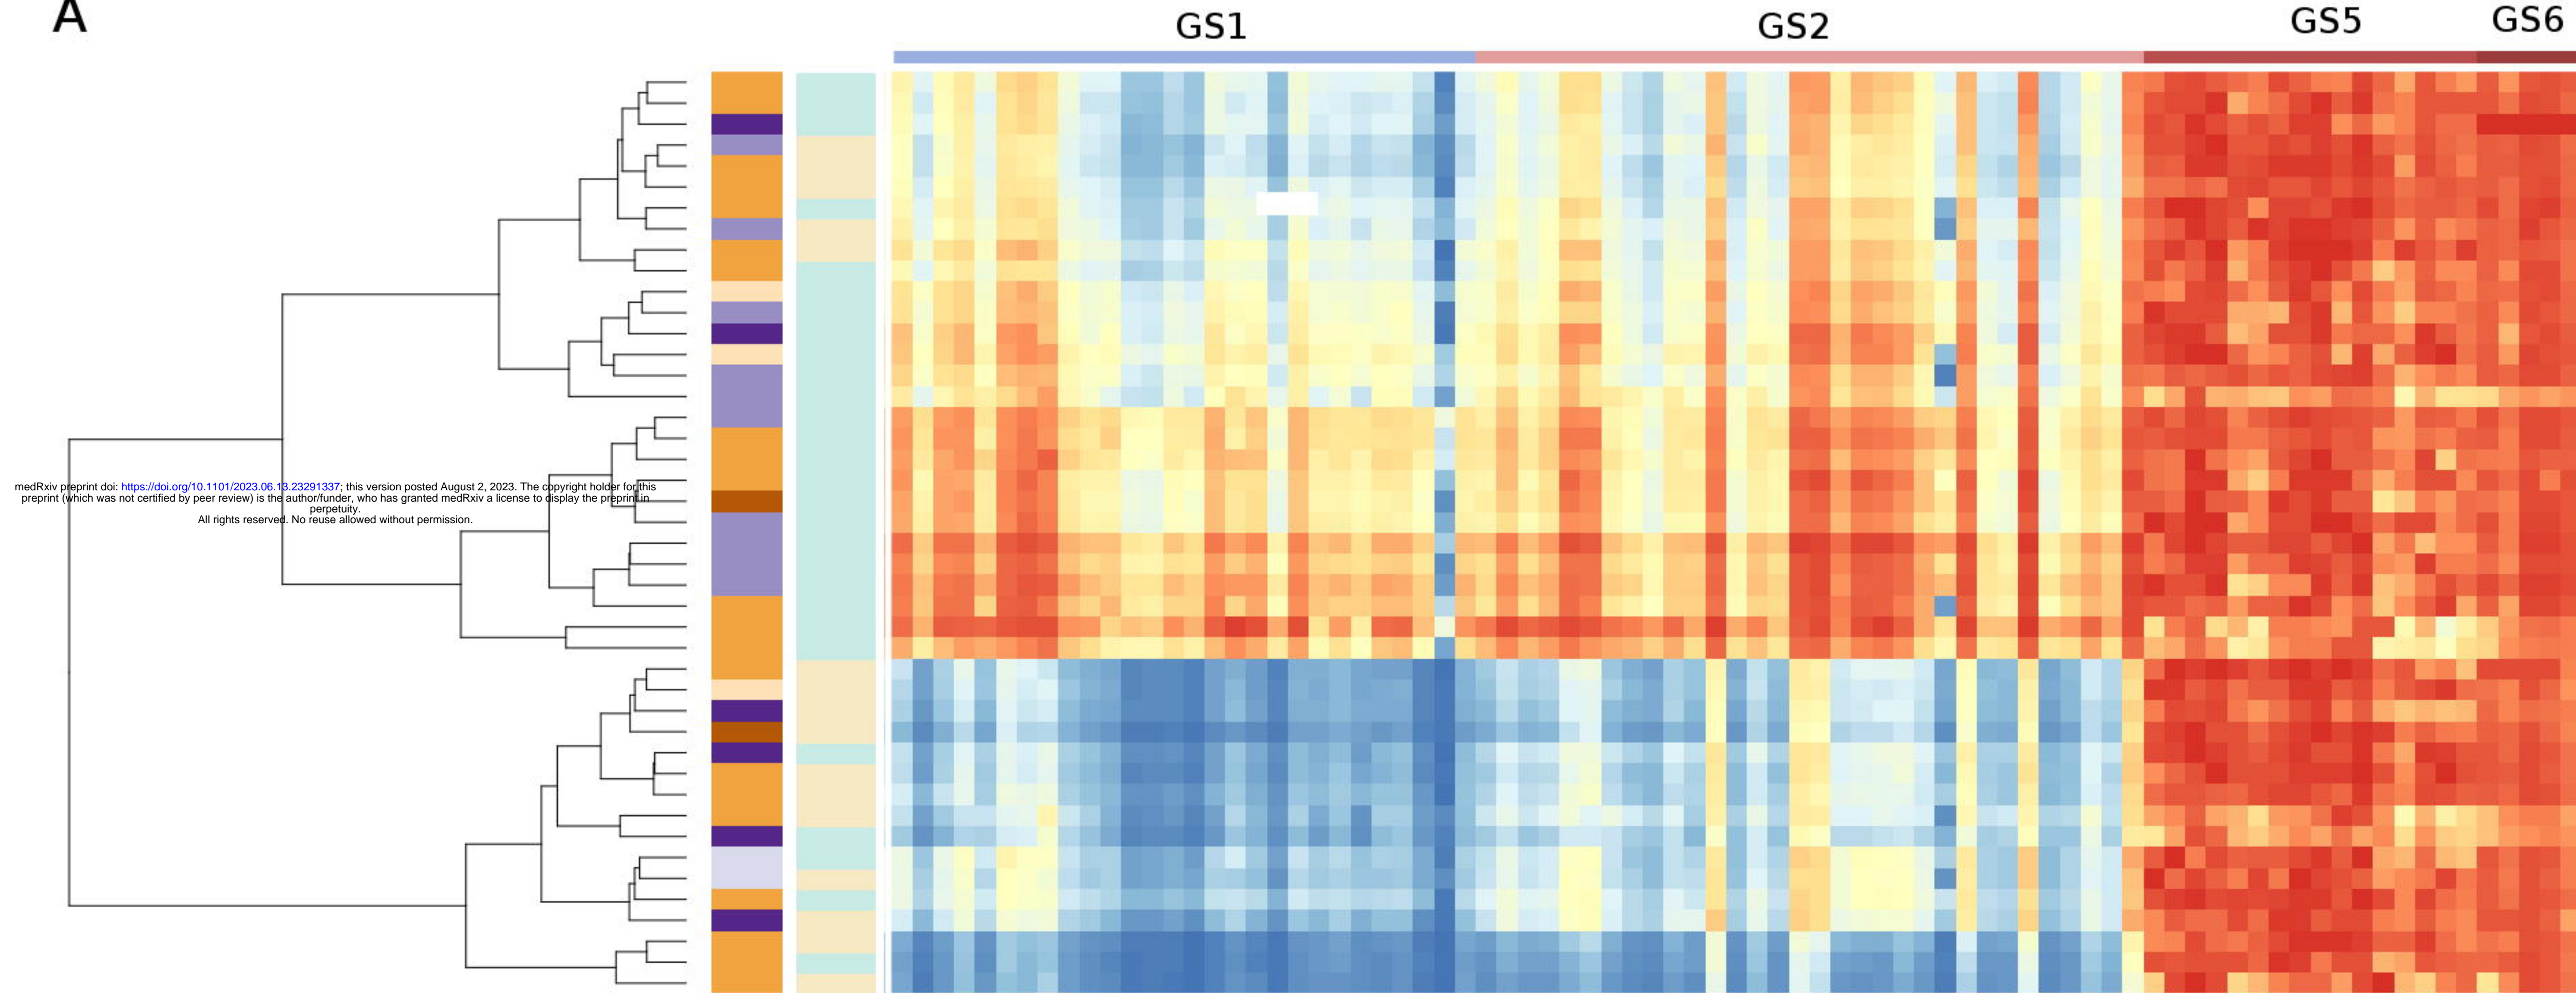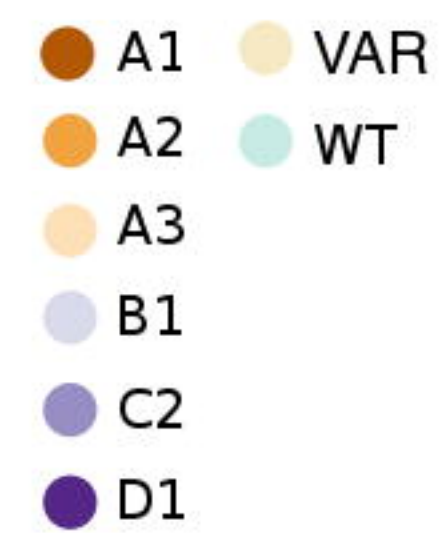**C**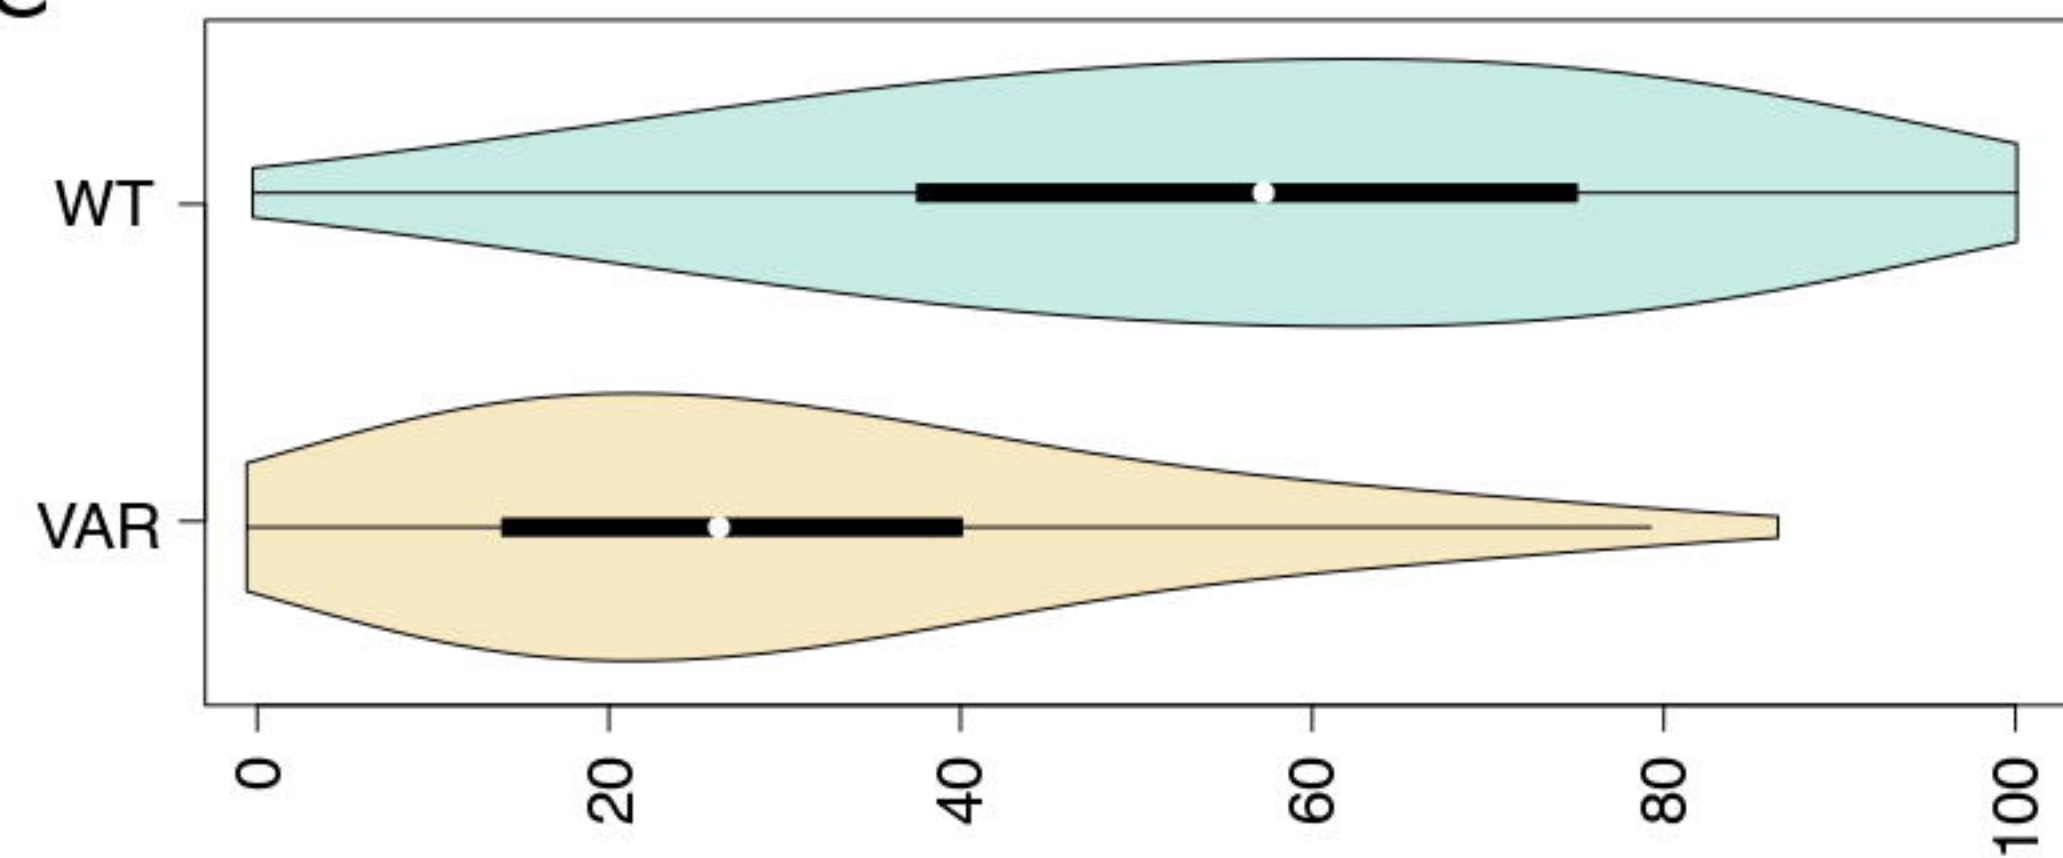**B**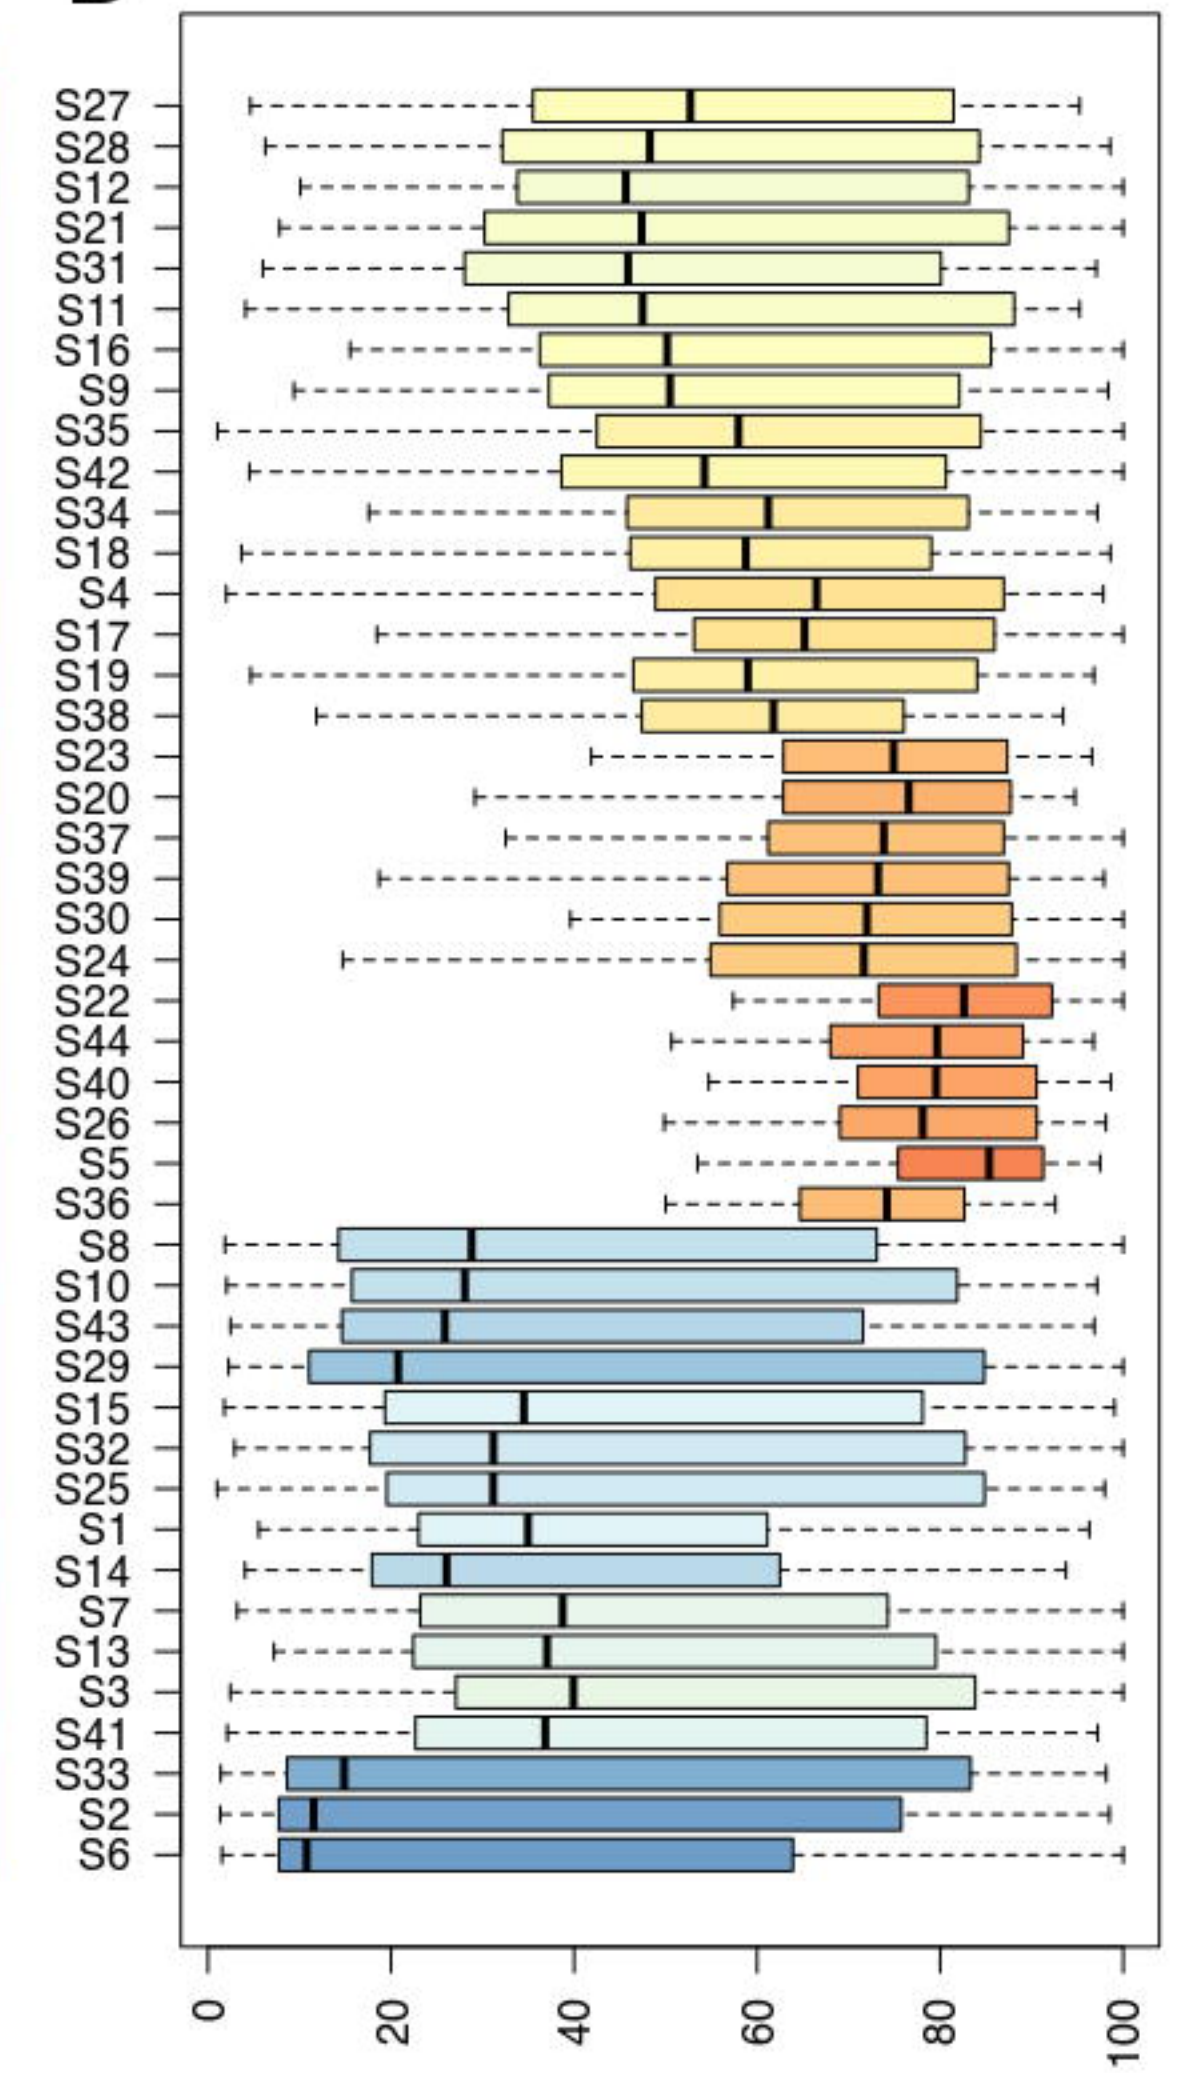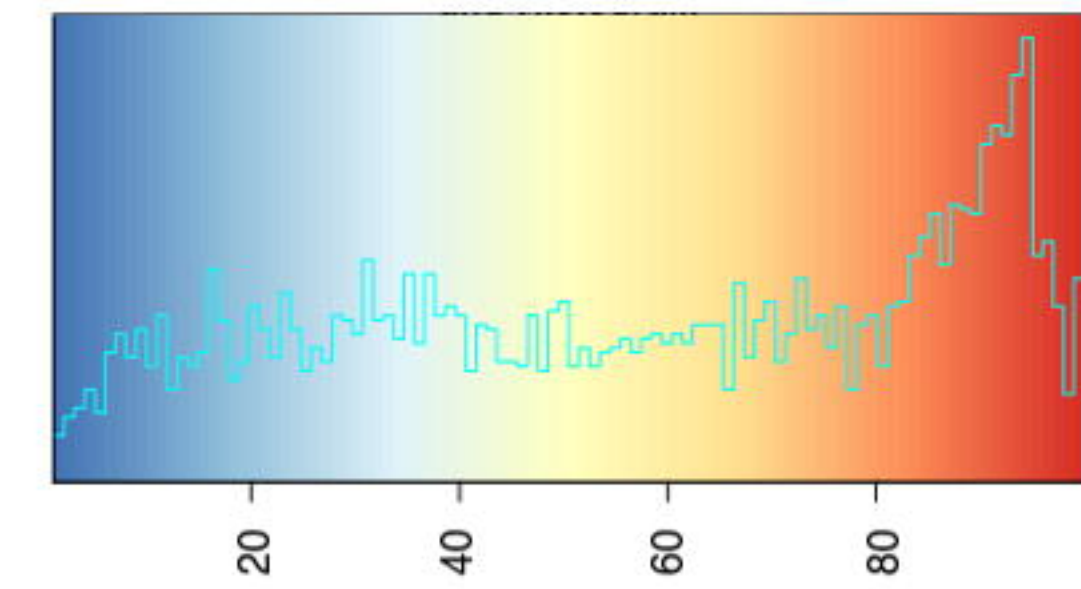



**A**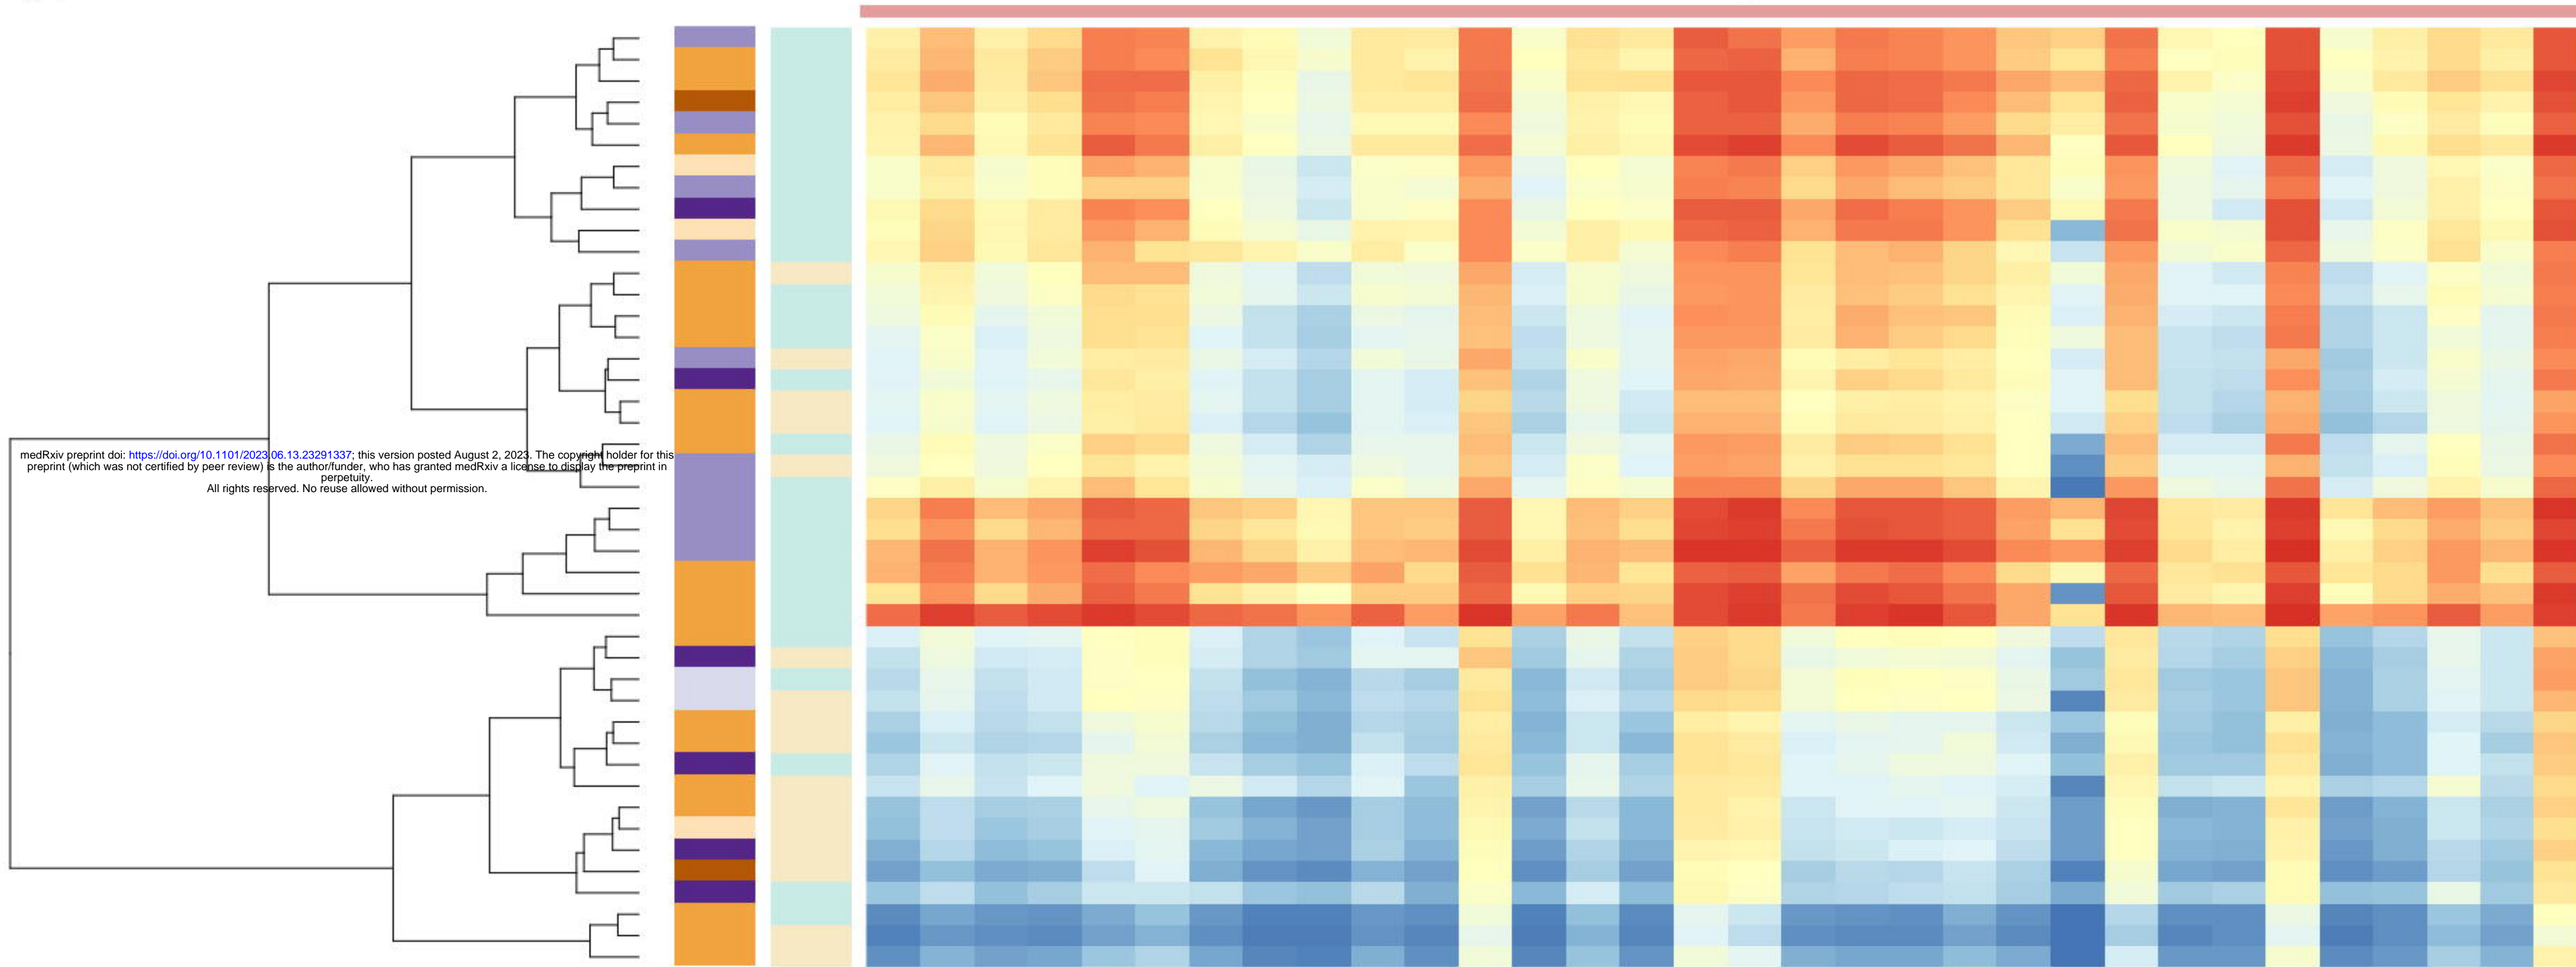**B**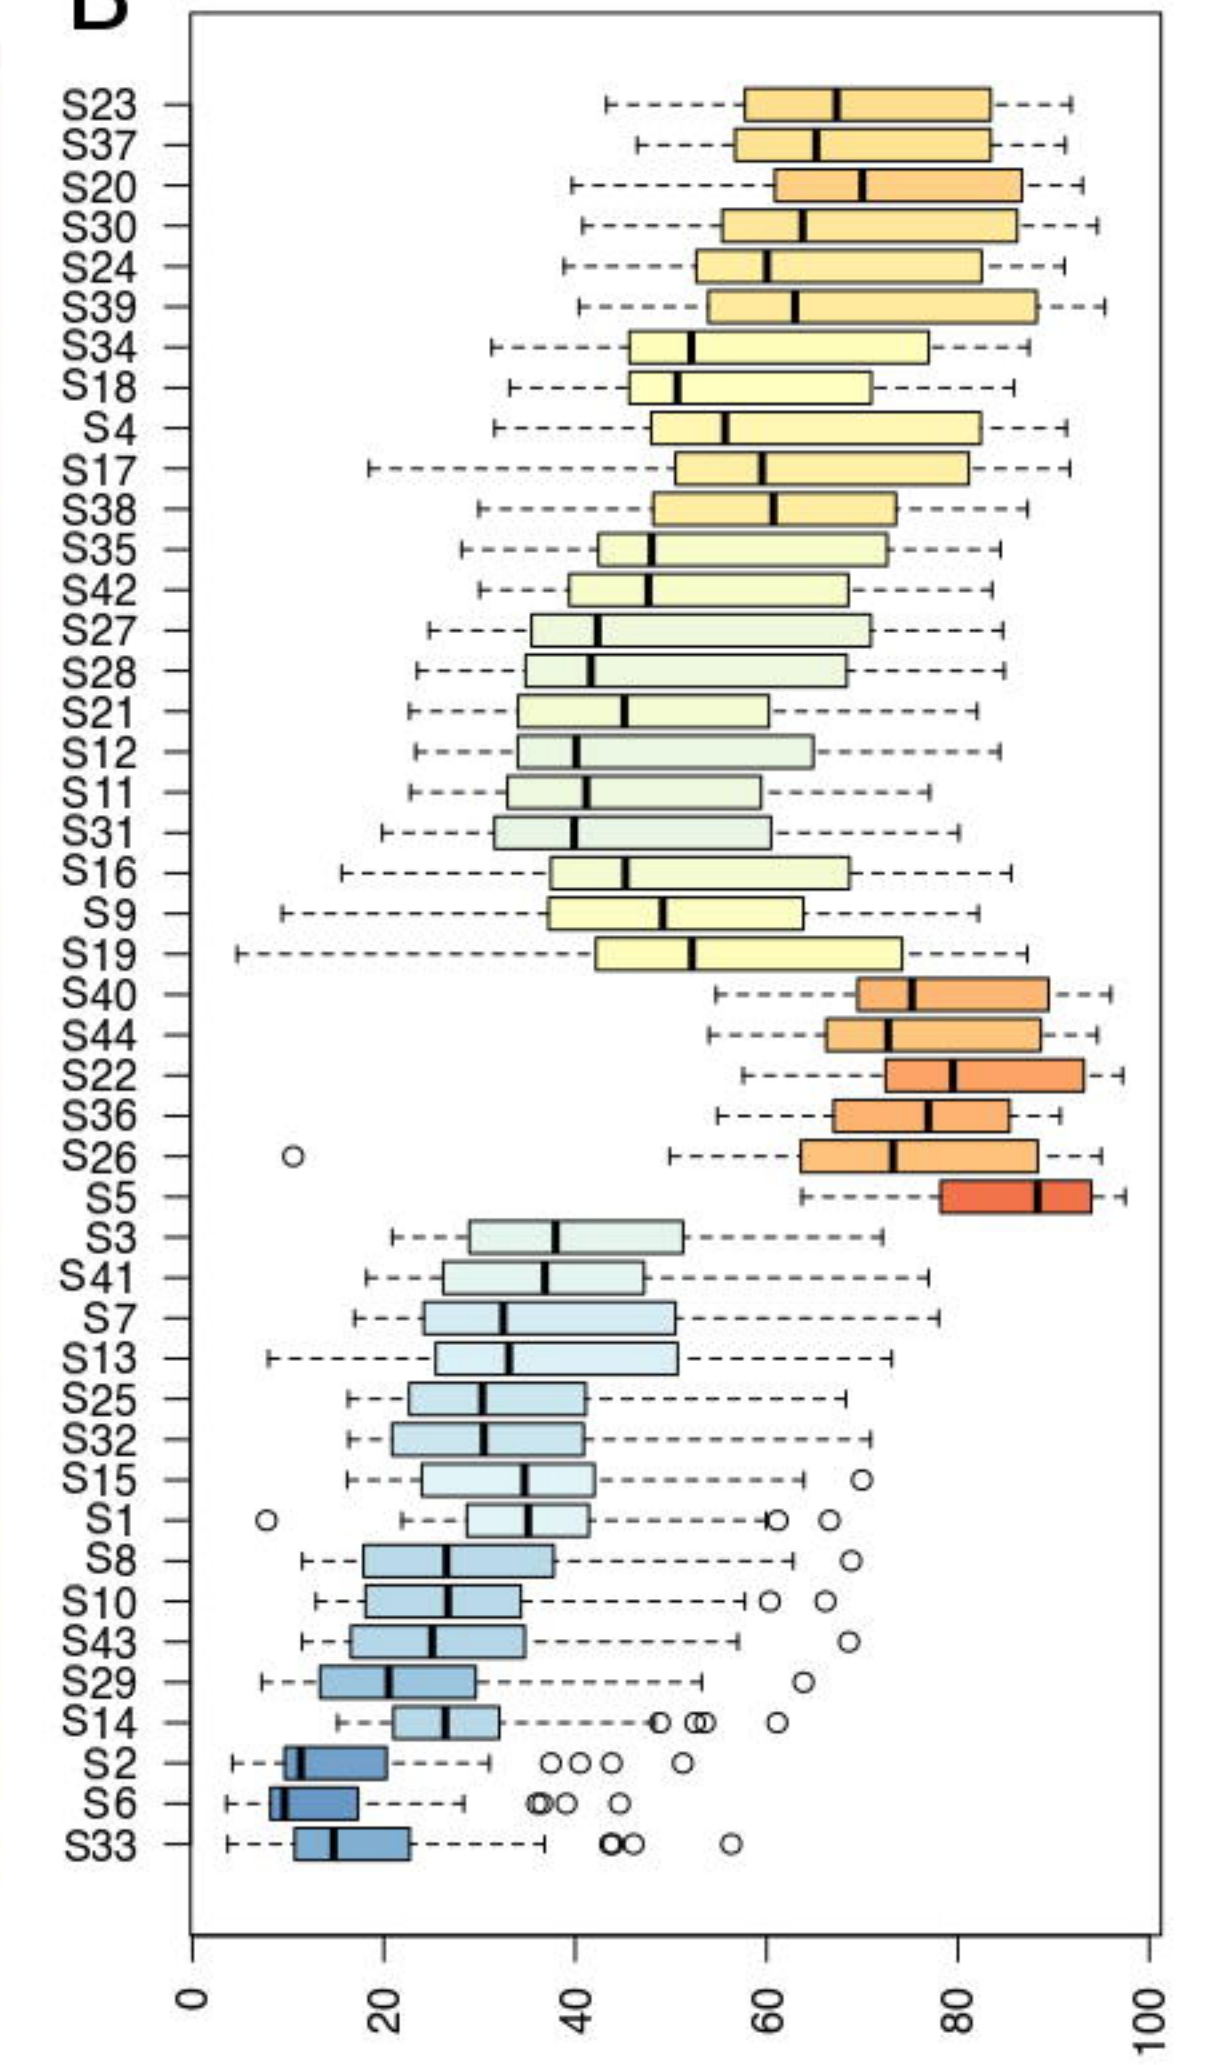**C**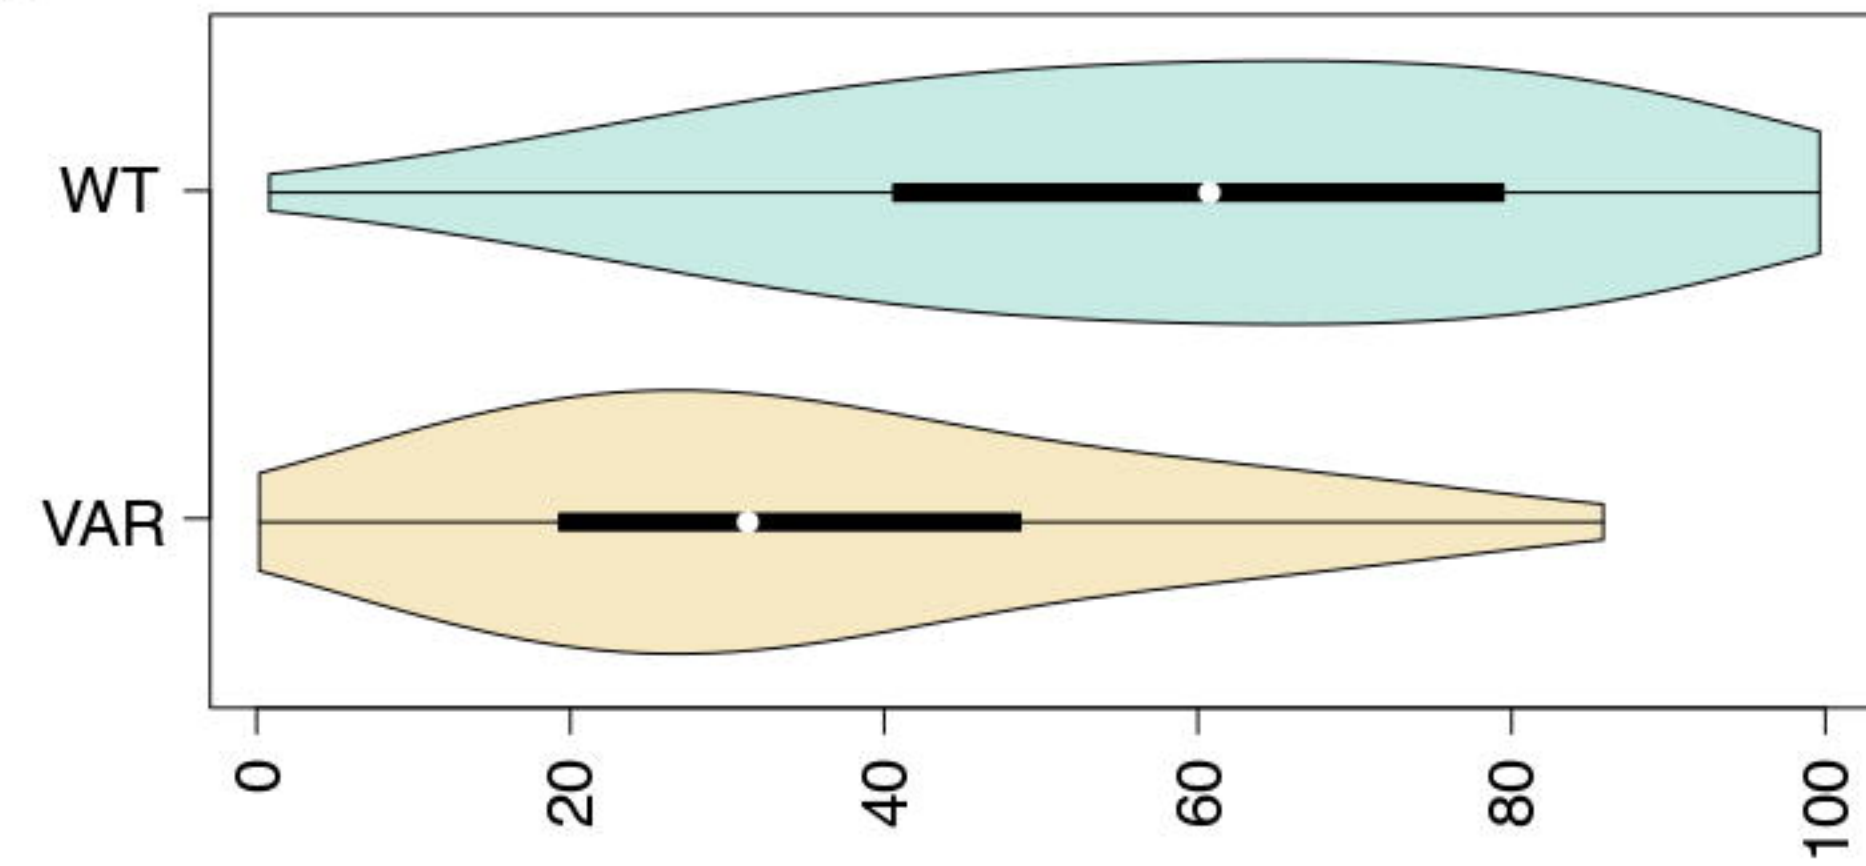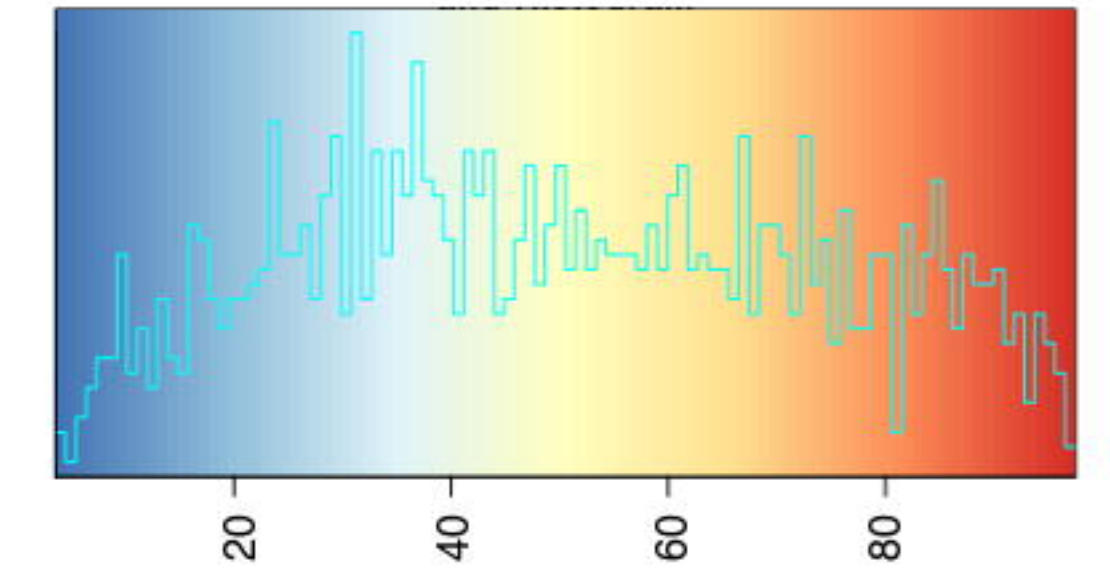



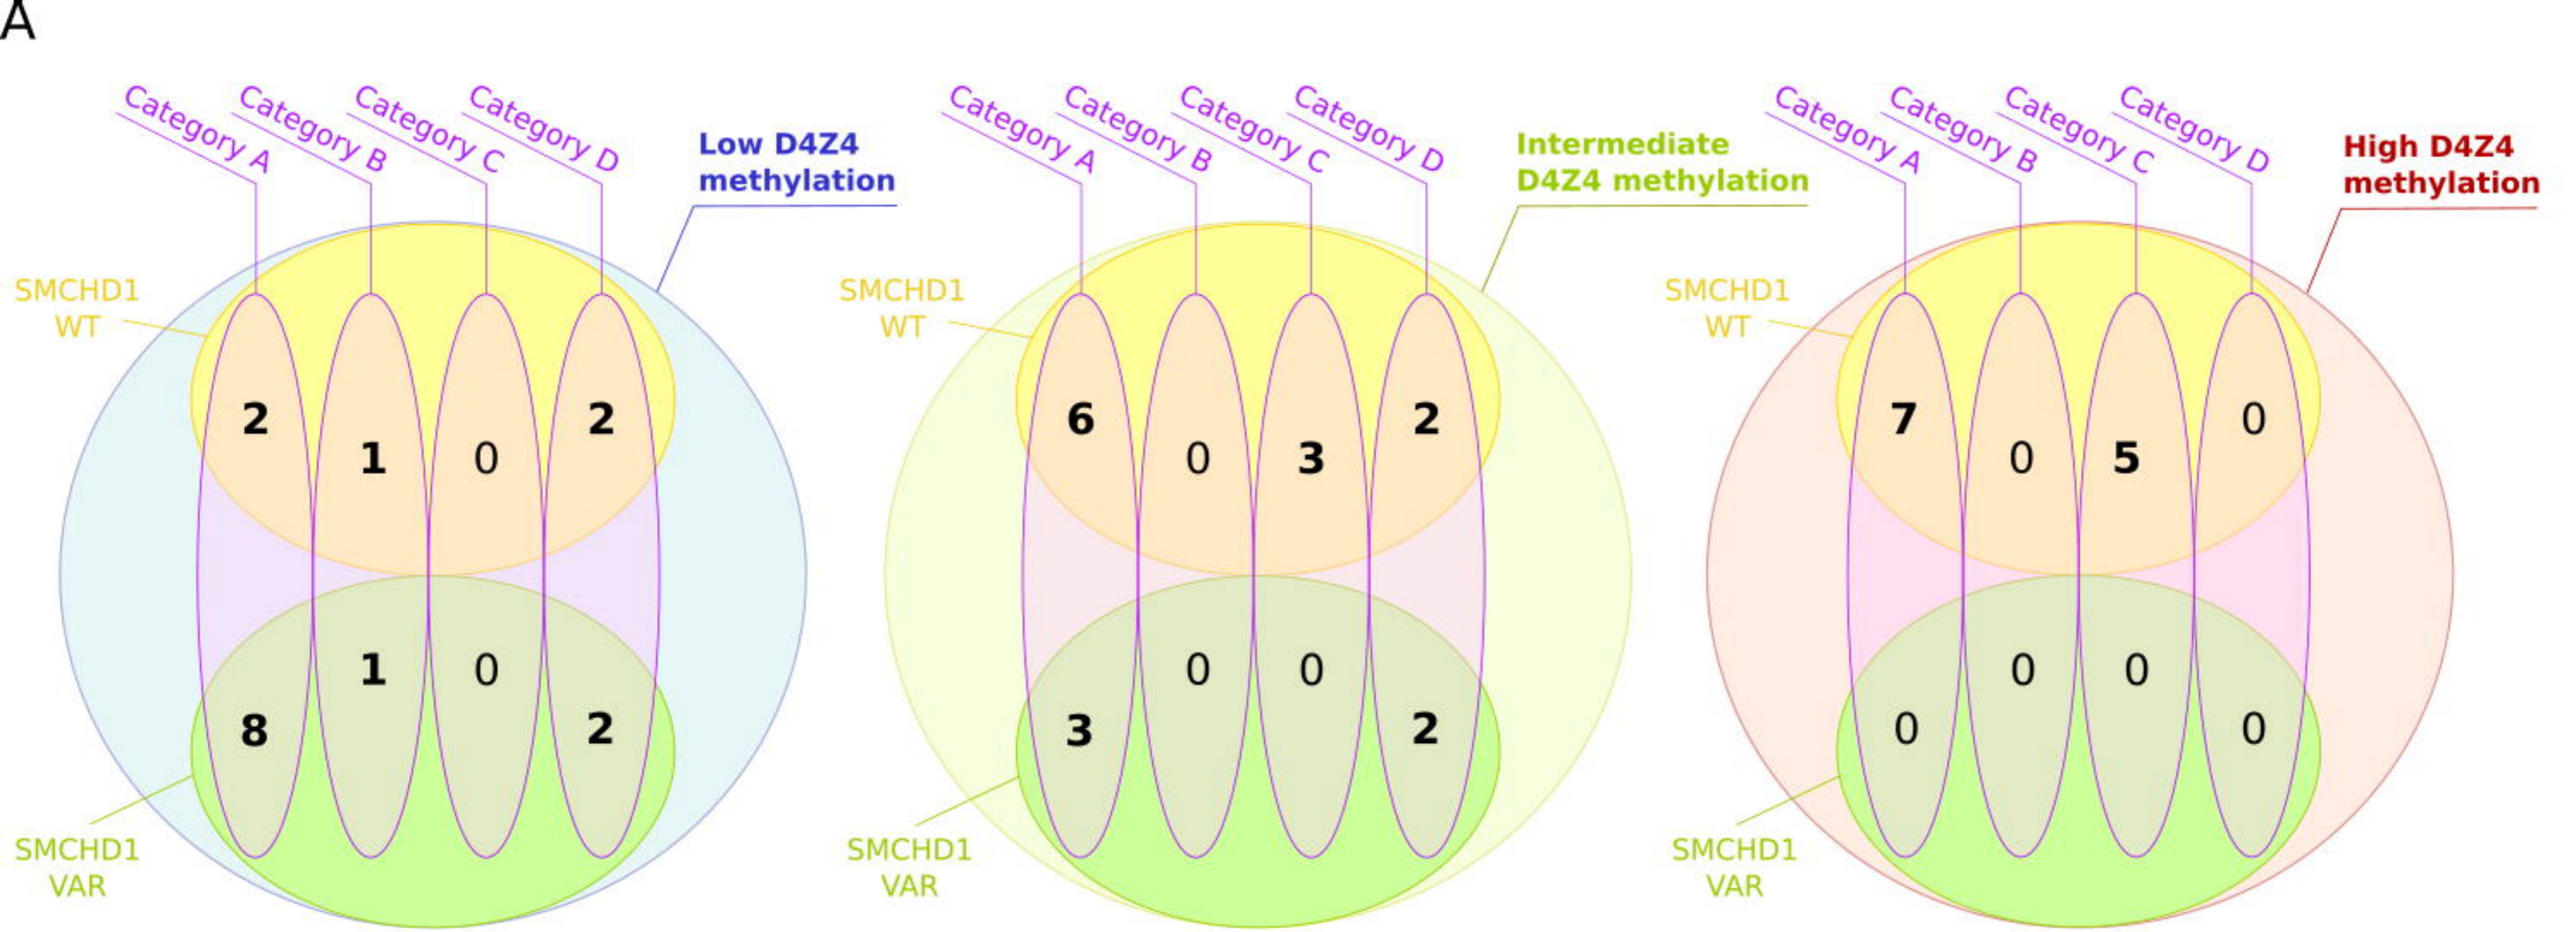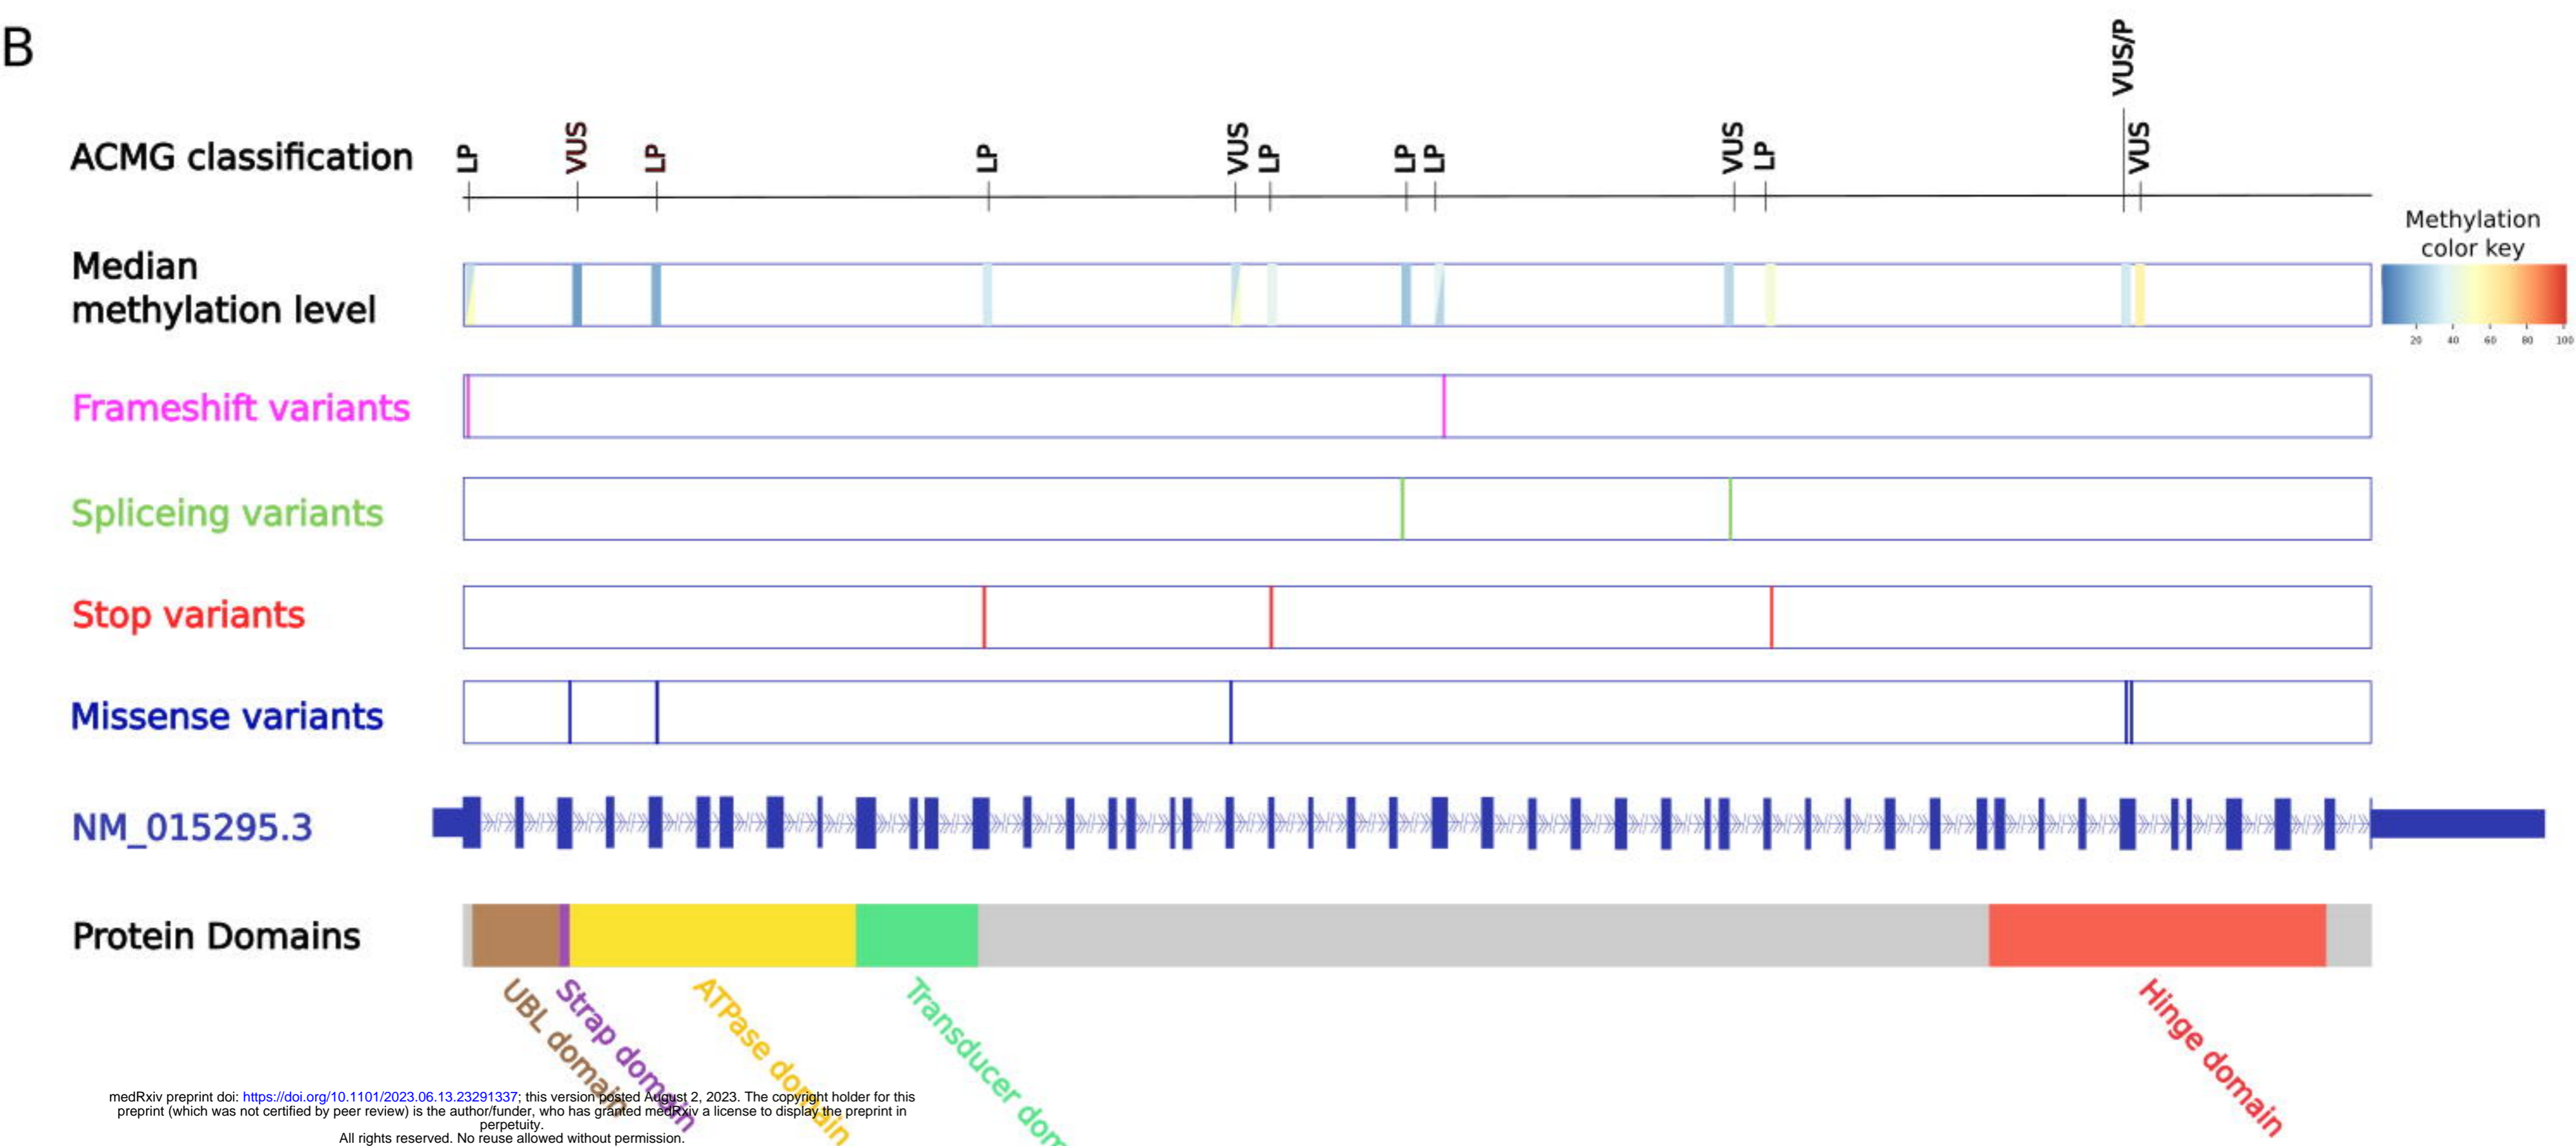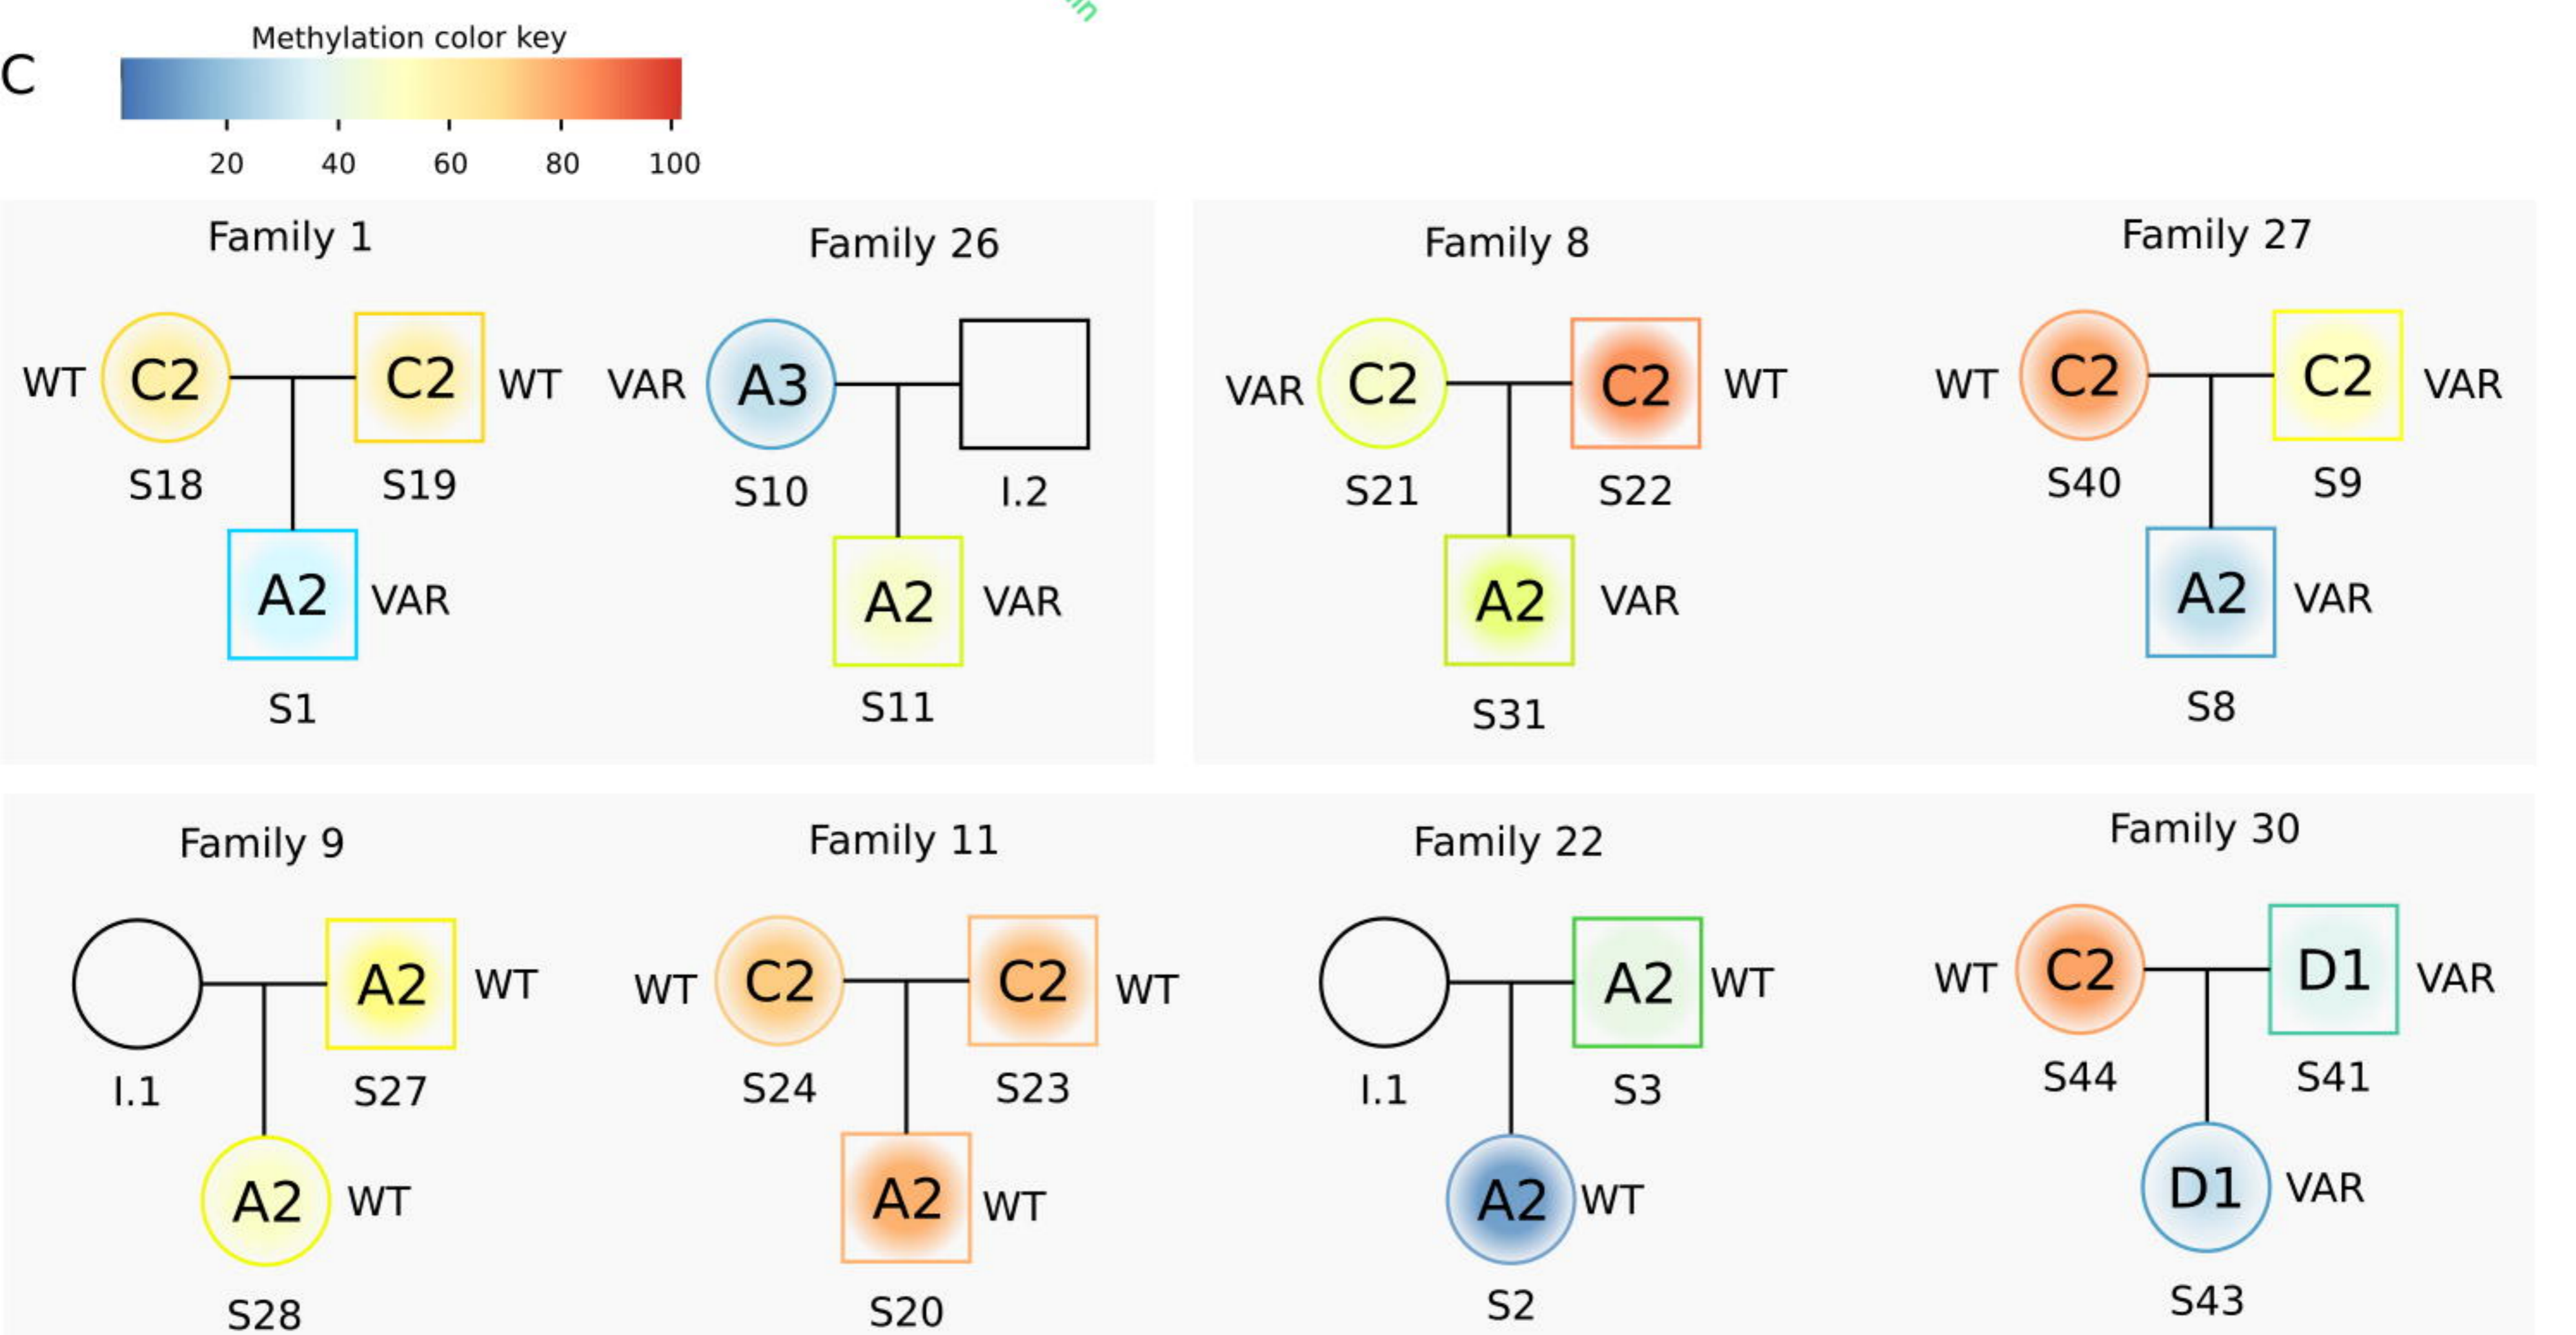

medRxiv preprint doi: <https://doi.org/10.1101/2023.06.13.23291337>; this version posted August 2, 2023. The copyright holder for this preprint (which was not certified by peer review) is the author/funder, who has granted medRxiv a license to display the preprint in perpetuity. All rights reserved. No reuse allowed without permission.



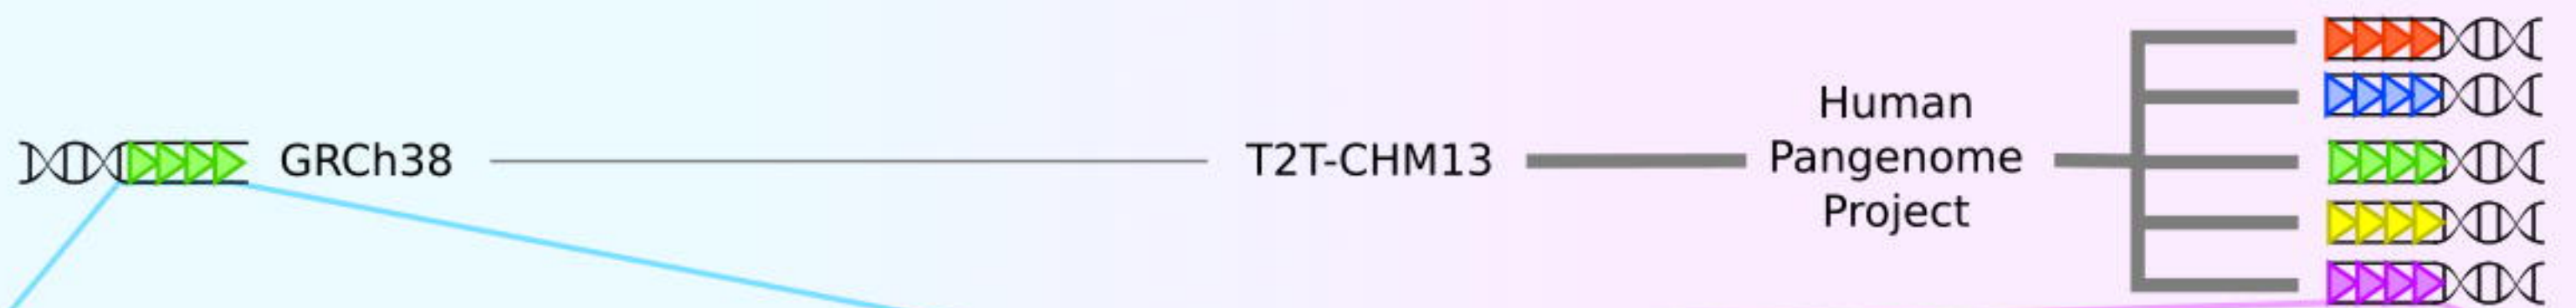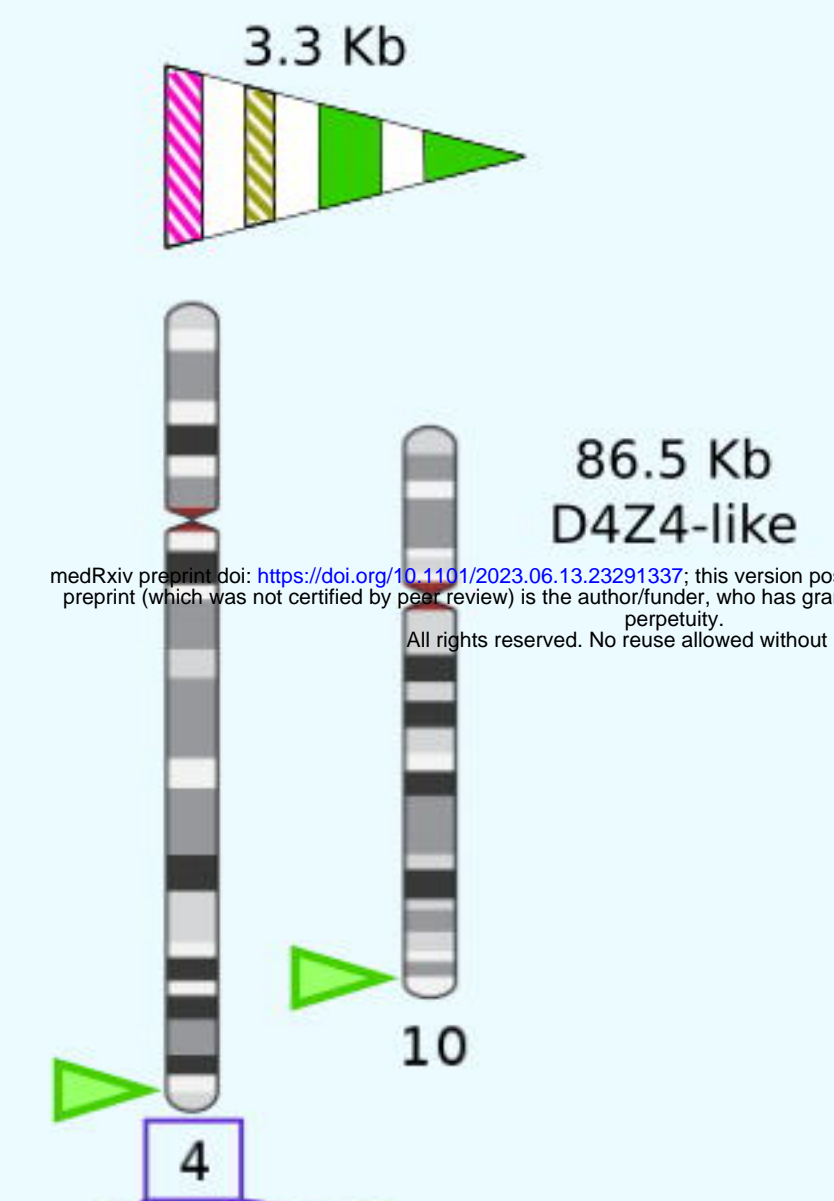

Genetic variability

0.7 - 1.5 Mb D4Z4-like

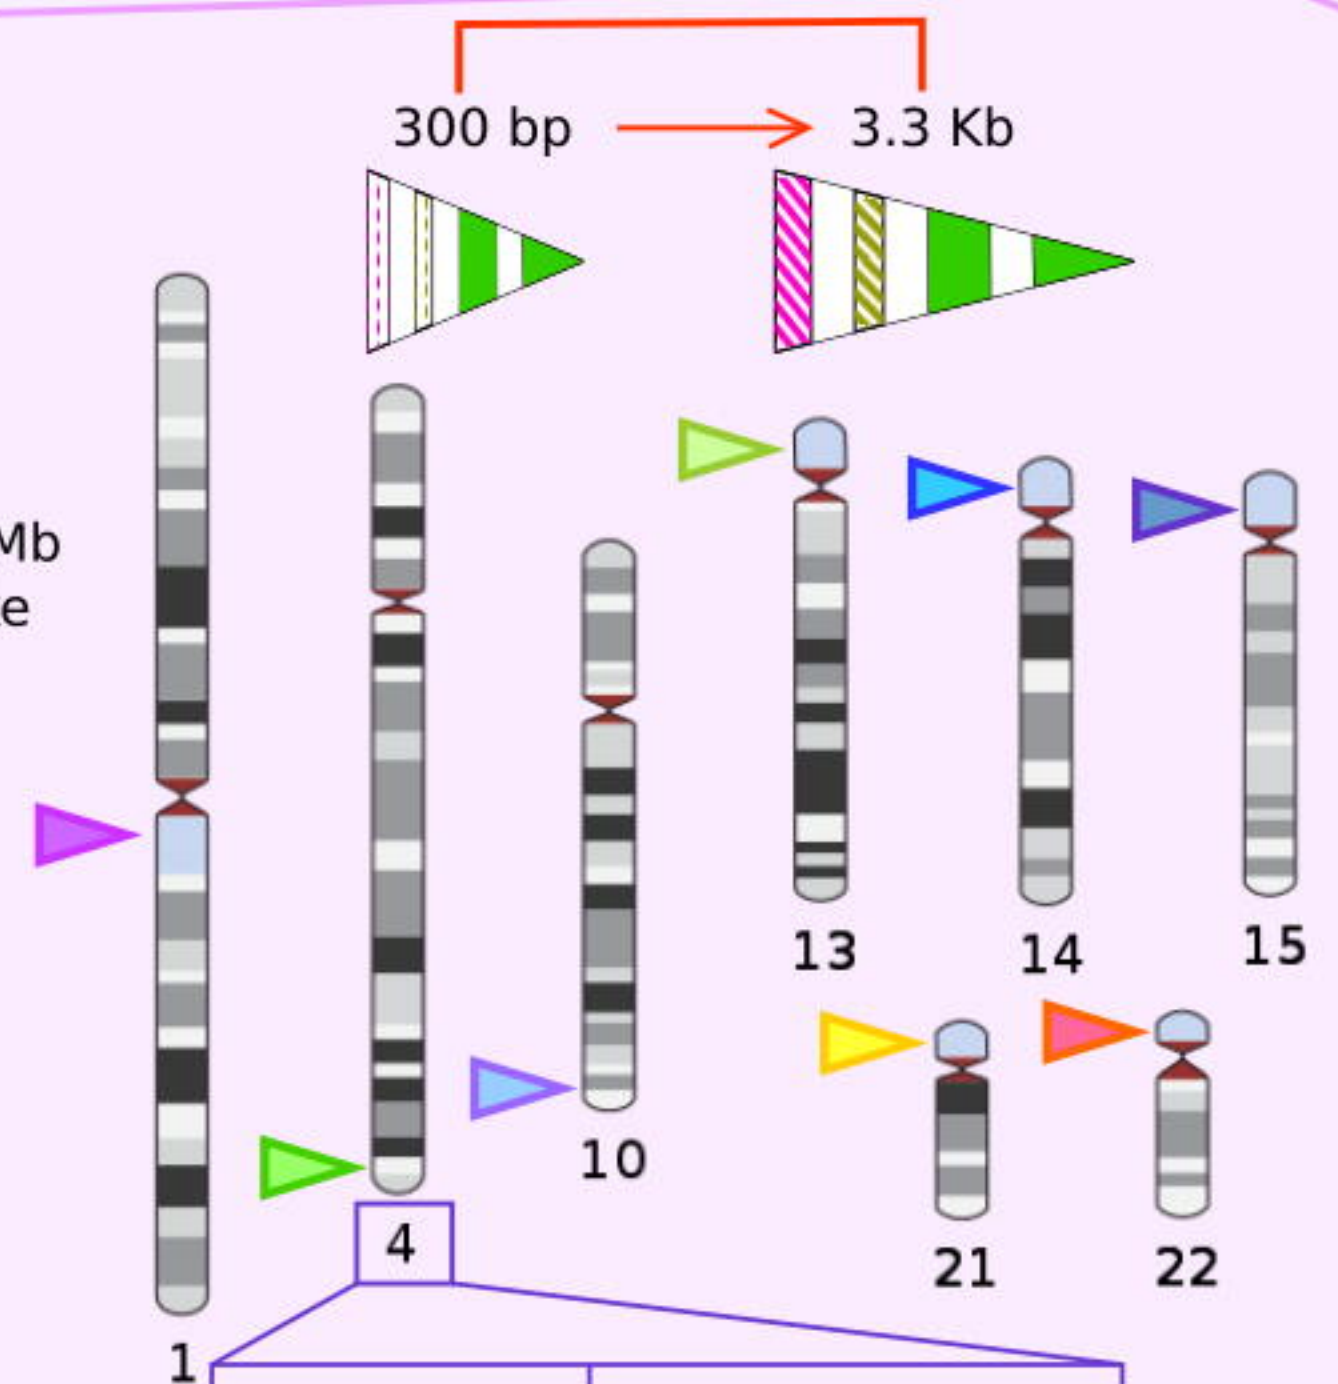

Phenotypic variability

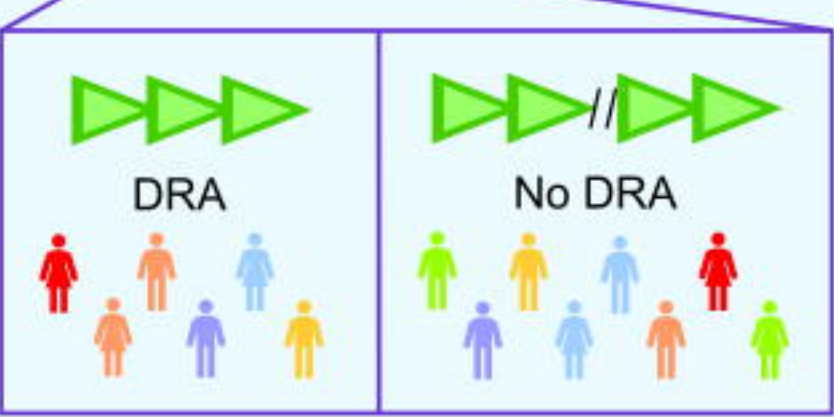

+4qA +SMCHD1 variants

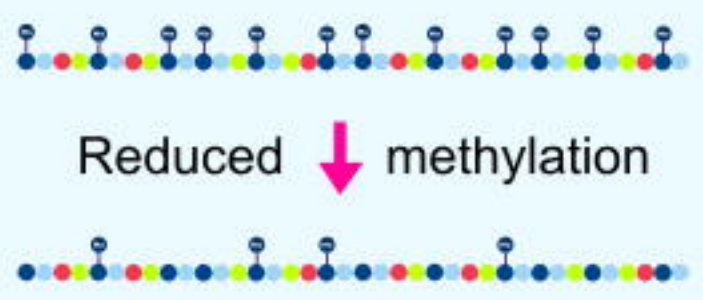

Transcriptional derepression

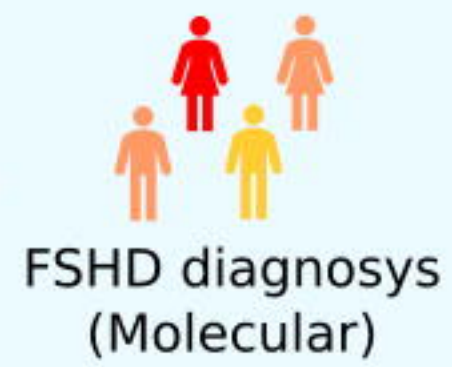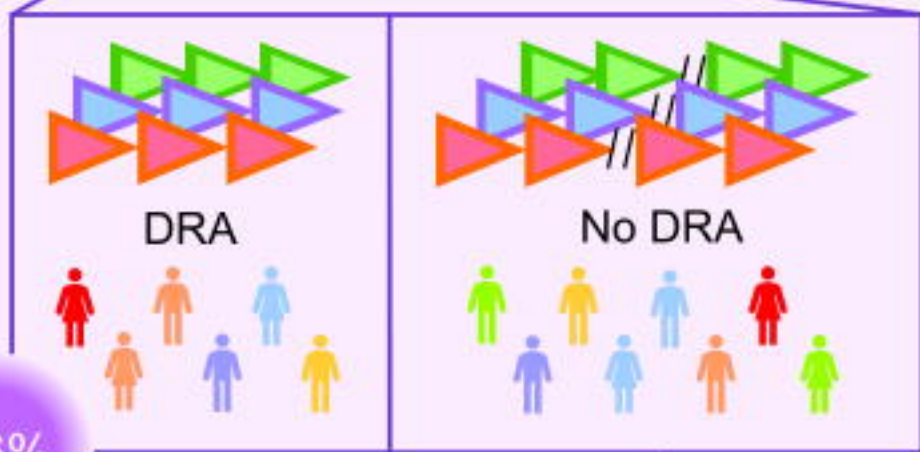

FSHD diagnosis (Clinical)

Other factors

+4qA +/-SMCHD1 variants

Transcriptional derepression

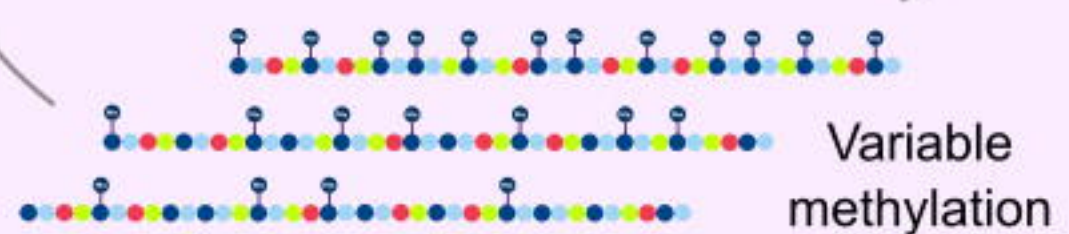

medRxiv preprint doi: <https://doi.org/10.1101/2023.06.13.23291337>; this version posted August 2, 2023. The copyright holder for this preprint (which was not certified by peer review) is the author/funder, who has granted medRxiv a license to display the preprint in perpetuity. All rights reserved. No reuse allowed without permission.
